# Supplementary material
Source: publisher figshare collection journal article supplement (https://karger.figshare.com/articles/dataset/_/6715517)
Supplement: Supplementary file 1 [file 1]

Table S3. Distribution of phylum level taxonomic classifications for surface, middle, and bottom layers metagenomes in 2016.

| Kingdom  | Phylum           | Surface |       |       |       |       |       |       | Middle |       |       |       |       |       |       | Bottom |       |       |       |       |       |       |
|----------|------------------|---------|-------|-------|-------|-------|-------|-------|--------|-------|-------|-------|-------|-------|-------|--------|-------|-------|-------|-------|-------|-------|
|          |                  | Jun     | Jul   | Aug   | Sep   | Oct   | Nov   | Dec   | Jun    | Jul   | Aug   | Sep   | Oct   | Nov   | Dec   | Jun    | Jul   | Aug   | Sep   | Oct   | Nov   | Dec   |
| Bacteria | Proteobacteria   | 40.51   | 41.80 | 43.41 | 33.04 | 48.65 | 40.81 | 63.19 | 41.17  | 44.66 | 34.52 | 35.16 | 54.28 | 37.94 | 35.69 | 40.68  | 49.52 | 53.72 | 44.18 | 51.28 | 44.88 | 22.38 |
| Bacteria | Cyanobacteria    | 26.83   | 17.65 | 16.11 | 26.80 | 25.18 | 27.84 | 2.60  | 28.97  | 8.18  | 19.07 | 27.11 | 25.40 | 27.15 | 5.64  | 21.26  | 4.35  | 3.52  | 7.28  | 17.06 | 20.19 | 2.46  |
| Bacteria | Bacteroidetes    | 9.04    | 18.83 | 24.47 | 12.94 | 16.87 | 15.00 | 20.36 | 7.01   | 16.53 | 22.40 | 9.62  | 13.17 | 17.15 | 27.13 | 11.98  | 13.14 | 17.68 | 8.71  | 15.33 | 12.23 | 17.57 |
| Bacteria | Actinobacteria   | 7.98    | 1.91  | 7.96  | 5.54  | 2.11  | 6.79  | 1.50  | 9.31   | 3.96  | 10.65 | 5.08  | 1.82  | 7.47  | 2.01  | 7.43   | 5.83  | 7.58  | 5.53  | 4.00  | 7.97  | 1.09  |
| Bacteria | Verrucomicrobia  | 9.99    | 10.03 | 2.58  | 7.60  | 1.45  | 1.40  | 4.99  | 7.76   | 14.97 | 5.00  | 7.26  | 2.11  | 2.11  | 7.92  | 7.38   | 6.35  | 4.90  | 7.14  | 2.22  | 2.31  | 6.44  |
| Bacteria | SAR406           | 1.12    | 0.11  | 0.13  | 0.83  | 0.40  | 0.92  |       | 1.14   | 1.33  | 0.72  | 1.39  | 0.51  | 0.91  | 0.01  | 2.61   | 2.56  | 1.88  | 2.24  | 0.99  | 2.17  |       |
| Bacteria | Planctomycetes   | 0.50    | 0.40  | 1.92  | 6.72  | 0.30  | 1.66  | 1.04  | 0.71   | 3.94  | 3.07  | 6.46  | 0.23  | 2.51  | 2.07  | 2.12   | 9.99  | 2.49  | 10.10 | 2.37  | 4.39  | 1.12  |
| Archaea  | Euryarchaeota    | 0.89    | 5.24  | 0.18  | 1.25  | 0.12  | 0.21  |       | 0.65   | 2.78  | 0.22  | 2.29  | 0.17  | 0.24  | 0.03  | 1.97   | 1.20  | 0.68  | 4.03  | 1.58  | 0.83  | 0.03  |
| Bacteria | Gemmatimonadetes | 0.00    |       |       | 0.02  | 0.00  | 0.00  | 0.00  | 0.00   | 0.00  |       | 0.04  |       | 0.02  | 0.00  | 0.35   | 0.13  | 0.04  | 0.11  | 0.21  | 0.12  | 0.01  |
| Bacteria | NKB19            | 0.00    | 0.00  | 0.00  | 0.02  |       | 0.00  |       | 0.05   | 0.03  | 0.00  | 0.01  |       | 0.00  | 0.00  | 0.24   | 0.07  | 0.06  | 0.14  | 0.02  | 0.01  | 0.00  |
| Bacteria | Firmicutes       | 0.03    | 0.02  | 0.22  | 0.06  | 0.31  | 1.33  | 1.79  | 0.03   | 0.05  | 0.13  | 0.06  | 0.01  | 0.05  | 13.83 | 0.16   | 0.10  | 0.64  | 0.19  | 0.07  | 0.11  | 42.62 |
| Bacteria | Chloroflexi      |         |       |       | 0.11  | 0.16  | 0.17  | 0.02  | 0.00   | 0.05  | 0.07  | 0.21  | 0.13  | 0.13  | 0.05  | 0.11   | 0.64  | 0.29  | 1.94  | 0.23  | 0.15  | 0.05  |
| Bacteria | Lentisphaerae    | 0.00    | 0.01  | 0.00  | 0.02  | 0.02  | 0.01  | 0.00  | 0.00   | 0.02  |       | 0.03  | 0.02  | 0.07  | 0.01  | 0.10   | 0.15  | 0.04  | 0.11  | 0.12  | 0.10  | 0.01  |
| Bacteria | ZB3              | 0.01    | 0.00  | 0.01  | 0.07  | 0.12  | 0.03  |       | 0.06   | 0.01  | 0.00  | 0.08  | 0.07  | 0.01  | 0.00  | 0.09   | 0.03  | 0.01  | 0.05  | 0.05  | 0.04  |       |
| Bacteria | OD1              | 0.00    |       |       | 0.01  | 0.00  | 0.01  | 0.01  | 0.00   | 0.00  | 0.00  | 0.01  | 0.01  | 0.02  | 0.03  | 0.07   | 0.14  | 0.30  | 0.22  | 0.03  | 0.06  | 0.01  |
| Bacteria | Acidobacteria    |         |       | 0.00  | 0.00  |       | 0.05  | 0.00  |        |       | 0.00  | 0.00  |       | 0.10  | 0.06  | 0.06   | 0.03  | 0.04  | 0.01  | 0.07  | 0.09  | 0.06  |
| Archaea  | Crenarchaeota    |         |       |       | 0.00  | 0.01  | 0.01  | 0.00  |        | 0.00  | 0.01  | 0.01  | 0.01  | 0.02  | 0.00  | 0.06   | 0.16  | 0.02  | 0.05  | 0.07  | 0.05  | 0.01  |
| Bacteria | Chlamydiae       | 0.01    | 0.00  | 0.01  | 0.01  | 0.00  | 0.09  |       | 0.01   | 0.01  | 0.01  | 0.02  | 0.01  | 0.12  | 0.02  | 0.05   | 0.03  | 0.10  | 0.05  | 0.07  | 0.10  | 0.02  |
| Bacteria | PAUC34f          |         |       |       | 0.01  | 0.00  |       |       | 0.00   |       |       | 0.02  | 0.01  |       |       | 0.03   | 0.01  |       | 0.03  | 0.00  | 0.00  |       |
| Bacteria | OP3              |         |       |       |       |       |       | 0.00  |        |       |       |       |       | 0.01  |       | 0.02   | 0.04  | 0.02  | 0.01  | 0.01  | 0.02  | 0.00  |
| Bacteria | Fusobacteria     | 0.00    | 0.00  | 0.00  | 0.00  | 0.02  | 0.02  |       | 0.00   | 0.01  | 0.00  | 0.01  |       | 0.00  | 0.03  | 0.02   | 0.15  | 0.09  | 0.02  | 0.06  | 0.02  | 0.01  |
| Bacteria | OP11             |         |       |       |       |       |       |       |        |       | 0.00  | 0.00  |       |       |       | 0.02   | 0.01  | 0.03  | 0.09  | 0.02  |       | 0.01  |
| Bacteria | TM7              |         |       | 0.00  | 0.01  | 0.01  | 0.40  |       |        |       |       |       |       | 0.42  | 0.15  | 0.01   |       | 0.01  | 0.00  |       | 0.11  | 0.06  |
| Bacteria | WS3              |         |       |       | 0.03  |       |       |       |        | 0.00  | 0.01  | 0.03  |       | 0.00  | 0.00  | 0.01   | 0.01  | 0.10  | 0.69  | 0.01  | 0.01  | 0.01  |
| Bacteria | GN02             |         | 0.01  | 0.01  | 0.00  | 0.03  | 0.03  | 0.37  |        | 0.01  | 0.02  | 0.01  | 0.01  | 0.10  | 0.50  | 0.01   | 0.07  | 0.28  | 0.19  | 0.08  | 0.47  | 0.21  |
| Bacteria | SBR1093          |         | 0.00  |       | 0.06  |       | 0.01  | 0.01  |        | 0.00  |       | 0.07  |       | 0.02  | 0.02  | 0.01   | 0.00  | 0.01  | 0.06  | 0.05  | 0.02  | 0.02  |
| Bacteria | Caldithrix       |         |       |       |       |       |       |       |        |       |       | 0.00  |       |       | 0.00  | 0.01   | 0.00  | 0.00  |       |       | 0.00  |       |
| Bacteria | Kazan-3B-28      |         |       |       | 0.00  |       |       |       |        |       |       |       |       |       |       | 0.01   |       |       |       |       |       |       |
| Bacteria | Tenericutes      | 0.00    |       | 0.00  | 0.02  | 0.00  | 0.00  | 0.04  | 0.00   | 0.01  | 0.48  | 0.02  |       | 0.02  | 0.08  | 0.01   | 0.04  | 0.96  | 0.11  |       | 0.01  | 0.48  |
| Bacteria | Chlorobi         |         |       | 0.00  | 0.02  |       |       |       |        |       | 0.00  | 0.03  |       | 0.00  | 0.01  | 0.01   | 0.01  | 0.02  | 0.69  | 0.04  | 0.03  | 0.00  |
| Bacteria | H-178            |         |       |       |       |       |       |       |        |       |       |       |       |       |       | 0.01   |       | 0.01  |       |       |       |       |
| Bacteria | Elusimicrobia    |         |       |       |       |       |       |       |        |       |       |       |       |       |       | 0.00   | 0.00  |       |       |       |       |       |
| Bacteria | SR1              |         |       |       |       | 0.00  |       |       |        |       |       | 0.00  |       |       |       | 0.00   |       | 0.01  | 0.01  | 0.00  |       |       |
| Bacteria | Nitrospirae      |         |       |       |       |       |       | 0.00  |        |       |       | 0.00  |       |       | 0.01  | 0.00   | 0.00  | 0.00  |       | 0.03  | 0.01  | 0.01  |
| Archaea  | [Parvarchaeota]  |         |       |       | 0.00  | 0.00  | 0.00  |       |        |       |       | 0.01  |       | 0.00  | 0.01  |        | 0.02  |       | 0.22  | 0.00  | 0.01  |       |
| Bacteria | AC1              |         |       |       |       |       |       |       |        |       |       |       |       |       |       |        |       |       |       | 0.01  |       |       |
| Bacteria | Armatimonadetes  |         |       |       |       |       |       |       |        |       |       | 0.00  |       |       |       |        |       | 0.00  |       |       |       |       |
| Bacteria | BHI80-139        |         |       |       |       |       |       |       |        |       |       |       |       |       |       |        |       |       | 0.00  |       |       |       |
| Bacteria | BRC1             |         |       |       |       |       |       |       |        |       |       |       |       |       |       |        |       |       | 0.00  | 0.00  |       |       |
| Bacteria | Deferribacteres  |         |       |       |       |       |       |       |        |       |       | 0.00  |       |       |       |        | 0.00  | 0.03  | 0.01  |       |       |       |
| Bacteria | Fibrobacteres    |         |       | 0.02  |       |       | 0.01  |       |        |       | 0.01  | 0.00  |       | 0.01  |       |        | 0.00  | 0.01  | 0.03  | 0.01  | 0.02  | 0.00  |

|            |                       |      |      |      |      |      |      |      |      |      |      |      |      |      |      |      |      |      |      |      |      |      |
|------------|-----------------------|------|------|------|------|------|------|------|------|------|------|------|------|------|------|------|------|------|------|------|------|------|
| Bacteria   | GN04                  |      |      |      |      |      |      |      |      |      |      |      |      |      |      |      |      | 0.01 |      | 0.00 |      |      |
| Bacteria   | Hyd24-12              |      |      |      |      |      |      |      |      |      |      |      |      |      |      |      |      |      | 0.00 |      |      |      |
| Bacteria   | KSB3                  |      |      |      |      |      |      |      |      |      |      |      |      |      |      |      | 0.00 |      |      |      |      |      |
| Bacteria   | OP1                   |      |      |      |      |      |      |      |      |      |      |      |      | 0.01 |      |      |      |      |      | 0.00 | 0.01 |      |
| Bacteria   | OP8                   |      |      |      |      |      |      |      | 0.00 |      |      |      |      |      |      |      | 0.00 |      |      | 0.00 | 0.01 |      |
| Bacteria   | Poribacteria          |      |      |      |      |      |      |      |      |      |      |      |      |      |      |      | 0.00 |      |      |      |      |      |
| Bacteria   | Spirochaetes          |      | 0.00 | 0.01 |      |      | 0.00 | 0.02 |      |      | 0.00 | 0.00 |      |      | 0.11 |      | 0.06 | 0.11 | 0.02 | 0.02 | 0.00 | 0.31 |
| Bacteria   | Synergistetes         |      |      |      |      | 0.00 |      | 0.01 |      |      |      |      |      |      | 0.01 |      |      | 0.00 |      | 0.00 | 0.01 |      |
| Bacteria   | TM6                   |      |      | 0.01 | 0.00 |      | 0.00 |      | 0.00 |      | 0.00 | 0.01 |      | 0.01 | 0.01 |      | 0.00 | 0.03 | 0.06 | 0.00 | 0.01 |      |
| Bacteria   | Thermotogae           |      |      |      |      | 0.00 |      |      |      |      |      |      |      |      |      |      |      | 0.01 |      |      |      |      |
| Bacteria   | WPS-2                 |      | 0.03 | 0.04 |      | 0.00 | 0.01 |      |      | 0.00 |      | 0.00 |      | 0.06 | 0.01 |      | 0.00 |      | 0.02 | 0.00 | 0.01 | 0.00 |
| Bacteria   | WS2                   |      |      |      |      |      |      |      |      |      |      |      |      |      |      |      | 0.00 | 0.01 |      |      | 0.01 |      |
| Bacteria   | WS5                   |      |      |      |      |      |      |      |      |      |      |      |      |      |      |      |      |      |      |      | 0.01 |      |
| Bacteria   | WS6                   |      |      |      | 0.00 |      |      |      |      |      |      |      |      |      |      |      |      | 0.01 | 0.11 | 0.01 |      |      |
| Bacteria   | WWE1                  |      |      |      |      |      |      |      |      |      |      |      |      |      |      |      | 0.01 | 0.04 | 0.01 |      |      |      |
| Bacteria   | [Caldithrix]          |      |      |      |      |      |      |      |      |      |      | 0.01 |      |      |      |      |      | 0.00 | 0.00 |      | 0.01 |      |
| Bacteria   | [Thermi]              |      |      |      |      |      |      |      |      |      |      |      |      |      | 0.00 |      |      | 0.02 |      |      |      |      |
| Bacteria   | Unclassified Bacteria | 0.02 | 0.00 | 0.00 | 0.00 | 0.00 | 0.00 |      | 0.04 | 0.00 |      | 0.00 |      | 0.01 | 0.01 | 0.03 | 0.00 |      | 0.00 |      | 0.00 | 0.02 |
| Unassigned | Unassigned            | 3.06 | 3.96 | 2.87 | 4.77 | 4.23 | 3.18 | 4.04 | 3.08 | 3.45 | 3.61 | 4.94 | 2.04 | 3.32 | 4.52 | 3.05 | 5.11 | 4.16 | 5.53 | 3.88 | 3.36 | 4.94 |
