# Supplementary material
Source: publisher figshare collection journal article supplement (https://karger.figshare.com/articles/dataset/_/6715517)
Supplement: Supplementary file 2 [file 1]

**Table S1. The taxonomic information including OTU identifiers represented in this study.**

| OTU identifier | Kingdom     | Phylum           | Class          | Order            | Family | Genus | Species |
|----------------|-------------|------------------|----------------|------------------|--------|-------|---------|
| 309271         | k__Bacteria | p__Cyanobacteria | c__Chloroplast | o__Stramenopiles | f__    | g__   | s__     |
| 1129121        | k__Bacteria | p__Cyanobacteria | c__Chloroplast | o__Stramenopiles | f__    | g__   | s__     |
| 101837         | k__Bacteria | p__Cyanobacteria | c__Chloroplast | o__Stramenopiles | f__    | g__   | s__     |
| 340298         | k__Bacteria | p__Cyanobacteria | c__Chloroplast | o__Stramenopiles | f__    | g__   | s__     |
| 338106         | k__Bacteria | p__Cyanobacteria | c__Chloroplast | o__Stramenopiles | f__    | g__   | s__     |
| 231911         | k__Bacteria | p__Cyanobacteria | c__Chloroplast | o__Stramenopiles | f__    | g__   | s__     |
| 232752         | k__Bacteria | p__Cyanobacteria | c__Chloroplast | o__Stramenopiles | f__    | g__   | s__     |
| 327536         | k__Bacteria | p__Cyanobacteria | c__Chloroplast | o__Stramenopiles | f__    | g__   | s__     |
| 109247         | k__Bacteria | p__Cyanobacteria | c__Chloroplast | o__Stramenopiles | f__    | g__   | s__     |
| 2914203        | k__Bacteria | p__Cyanobacteria | c__Chloroplast | o__Stramenopiles | f__    | g__   | s__     |
| 313351         | k__Bacteria | p__Cyanobacteria | c__Chloroplast | o__Stramenopiles | f__    | g__   | s__     |
| 2100829        | k__Bacteria | p__Cyanobacteria | c__Chloroplast | o__Stramenopiles | f__    | g__   | s__     |
| 148456         | k__Bacteria | p__Cyanobacteria | c__Chloroplast | o__Stramenopiles | f__    | g__   | s__     |
| 296128         | k__Bacteria | p__Cyanobacteria | c__Chloroplast | o__Stramenopiles | f__    | g__   | s__     |
| 1124799        | k__Bacteria | p__Cyanobacteria | c__Chloroplast | o__Stramenopiles | f__    | g__   | s__     |
| 106991         | k__Bacteria | p__Cyanobacteria | c__Chloroplast | o__Stramenopiles | f__    | g__   | s__     |
| 228252         | k__Bacteria | p__Cyanobacteria | c__Chloroplast | o__Stramenopiles | f__    | g__   | s__     |
| 2345806        | k__Bacteria | p__Cyanobacteria | c__Chloroplast | o__Stramenopiles | f__    | g__   | s__     |
| 1109647        | k__Bacteria | p__Cyanobacteria | c__Chloroplast | o__Stramenopiles | f__    | g__   | s__     |
| 340216         | k__Bacteria | p__Cyanobacteria | c__Chloroplast | o__Stramenopiles | f__    | g__   | s__     |
| 103868         | k__Bacteria | p__Cyanobacteria | c__Chloroplast | o__Stramenopiles | f__    | g__   | s__     |
| 1106681        | k__Bacteria | p__Cyanobacteria | c__Chloroplast | o__Stramenopiles | f__    | g__   | s__     |
| 106539         | k__Bacteria | p__Cyanobacteria | c__Chloroplast | o__Stramenopiles | f__    | g__   | s__     |
| 2224034        | k__Bacteria | p__Cyanobacteria | c__Chloroplast | o__Stramenopiles | f__    | g__   | s__     |
| 1663335        | k__Bacteria | p__Cyanobacteria | c__Chloroplast | o__Stramenopiles | f__    | g__   | s__     |
| 3439           | k__Bacteria | p__Cyanobacteria | c__Chloroplast | o__Stramenopiles | f__    | g__   | s__     |
| 1139492        | k__Bacteria | p__Cyanobacteria | c__Chloroplast | o__Stramenopiles | f__    | g__   | s__     |
| 317794         | k__Bacteria | p__Cyanobacteria | c__Chloroplast | o__Stramenopiles | f__    | g__   | s__     |
| 2986479        | k__Bacteria | p__Cyanobacteria | c__Chloroplast | o__Stramenopiles | f__    | g__   | s__     |
| 227965         | k__Bacteria | p__Cyanobacteria | c__Chloroplast | o__Stramenopiles | f__    | g__   | s__     |
| 316785         | k__Bacteria | p__Cyanobacteria | c__Chloroplast | o__Stramenopiles | f__    | g__   | s__     |
| 332009         | k__Bacteria | p__Cyanobacteria | c__Chloroplast | o__Stramenopiles | f__    | g__   | s__     |
| 308629         | k__Bacteria | p__Cyanobacteria | c__Chloroplast | o__Stramenopiles | f__    | g__   | s__     |
| 2140618        | k__Bacteria | p__Cyanobacteria | c__Chloroplast | o__Stramenopiles | f__    | g__   | s__     |
| 347310         | k__Bacteria | p__Cyanobacteria | c__Chloroplast | o__Stramenopiles | f__    | g__   | s__     |

|         |             |                  |                |                  |     |     |     |
|---------|-------------|------------------|----------------|------------------|-----|-----|-----|
| 337487  | k__Bacteria | p__Cyanobacteria | c__Chloroplast | o__Stramenopiles | f__ | g__ | s__ |
| 587648  | k__Bacteria | p__Cyanobacteria | c__Chloroplast | o__Stramenopiles | f__ | g__ | s__ |
| 361839  | k__Bacteria | p__Cyanobacteria | c__Chloroplast | o__Stramenopiles | f__ | g__ | s__ |
| 348903  | k__Bacteria | p__Cyanobacteria | c__Chloroplast | o__Stramenopiles | f__ | g__ | s__ |
| 4477200 | k__Bacteria | p__Cyanobacteria | c__Chloroplast | o__Stramenopiles | f__ | g__ | s__ |
| 560496  | k__Bacteria | p__Cyanobacteria | c__Chloroplast | o__Stramenopiles | f__ | g__ | s__ |
| 4150879 | k__Bacteria | p__Cyanobacteria | c__Chloroplast | o__Stramenopiles | f__ | g__ | s__ |
| 576419  | k__Bacteria | p__Cyanobacteria | c__Chloroplast | o__Stramenopiles | f__ | g__ | s__ |
| 4322607 | k__Bacteria | p__Cyanobacteria | c__Chloroplast | o__Stramenopiles | f__ | g__ | s__ |
| 589152  | k__Bacteria | p__Cyanobacteria | c__Chloroplast | o__Stramenopiles | f__ | g__ | s__ |
| 660336  | k__Bacteria | p__Cyanobacteria | c__Chloroplast | o__Stramenopiles | f__ | g__ | s__ |
| 4411706 | k__Bacteria | p__Cyanobacteria | c__Chloroplast | o__Stramenopiles | f__ | g__ | s__ |
| 532823  | k__Bacteria | p__Cyanobacteria | c__Chloroplast | o__Stramenopiles | f__ | g__ | s__ |
| 718321  | k__Bacteria | p__Cyanobacteria | c__Chloroplast | o__Stramenopiles | f__ | g__ | s__ |
| 549748  | k__Bacteria | p__Cyanobacteria | c__Chloroplast | o__Stramenopiles | f__ | g__ | s__ |
| 354695  | k__Bacteria | p__Cyanobacteria | c__Chloroplast | o__Stramenopiles | f__ | g__ | s__ |
| 585911  | k__Bacteria | p__Cyanobacteria | c__Chloroplast | o__Stramenopiles | f__ | g__ | s__ |
| 358682  | k__Bacteria | p__Cyanobacteria | c__Chloroplast | o__Stramenopiles | f__ | g__ | s__ |
| 583758  | k__Bacteria | p__Cyanobacteria | c__Chloroplast | o__Stramenopiles | f__ | g__ | s__ |
| 592855  | k__Bacteria | p__Cyanobacteria | c__Chloroplast | o__Stramenopiles | f__ | g__ | s__ |
| 4334010 | k__Bacteria | p__Cyanobacteria | c__Chloroplast | o__Stramenopiles | f__ | g__ | s__ |
| 38733   | k__Bacteria | p__Cyanobacteria | c__Chloroplast | o__Stramenopiles | f__ | g__ | s__ |
| 607386  | k__Bacteria | p__Cyanobacteria | c__Chloroplast | o__Stramenopiles | f__ | g__ | s__ |
| 4402734 | k__Bacteria | p__Cyanobacteria | c__Chloroplast | o__Stramenopiles | f__ | g__ | s__ |
| 4479504 | k__Bacteria | p__Cyanobacteria | c__Chloroplast | o__Stramenopiles | f__ | g__ | s__ |
| 579531  | k__Bacteria | p__Cyanobacteria | c__Chloroplast | o__Stramenopiles | f__ | g__ | s__ |
| 4315885 | k__Bacteria | p__Cyanobacteria | c__Chloroplast | o__Stramenopiles | f__ | g__ | s__ |
| 347931  | k__Bacteria | p__Cyanobacteria | c__Chloroplast | o__Stramenopiles | f__ | g__ | s__ |
| 564099  | k__Bacteria | p__Cyanobacteria | c__Chloroplast | o__Stramenopiles | f__ | g__ | s__ |
| 4350498 | k__Bacteria | p__Cyanobacteria | c__Chloroplast | o__Stramenopiles | f__ | g__ | s__ |
| 590936  | k__Bacteria | p__Cyanobacteria | c__Chloroplast | o__Stramenopiles | f__ | g__ | s__ |
| 549656  | k__Bacteria | p__Cyanobacteria | c__Chloroplast | o__Stramenopiles | f__ | g__ | s__ |
| 574920  | k__Bacteria | p__Cyanobacteria | c__Chloroplast | o__Stramenopiles | f__ | g__ | s__ |
| 569835  | k__Bacteria | p__Cyanobacteria | c__Chloroplast | o__Stramenopiles | f__ | g__ | s__ |
| 532888  | k__Bacteria | p__Cyanobacteria | c__Chloroplast | o__Stramenopiles | f__ | g__ | s__ |
| 4350193 | k__Bacteria | p__Cyanobacteria | c__Chloroplast | o__Stramenopiles | f__ | g__ | s__ |
| 367949  | k__Bacteria | p__Cyanobacteria | c__Chloroplast | o__Stramenopiles | f__ | g__ | s__ |

|                                |             |                  |                |                  |     |     |     |
|--------------------------------|-------------|------------------|----------------|------------------|-----|-----|-----|
| 4408667                        | k__Bacteria | p__Cyanobacteria | c__Chloroplast | o__Stramenopiles | f__ | g__ | s__ |
| New.CleanUp.ReferenceOTU101748 | k__Bacteria | p__Cyanobacteria | c__Chloroplast | o__Stramenopiles | f__ | g__ | s__ |
| 760006                         | k__Bacteria | p__Cyanobacteria | c__Chloroplast | o__Stramenopiles | f__ | g__ | s__ |
| New.ReferenceOTU586            | k__Bacteria | p__Cyanobacteria | c__Chloroplast | o__Stramenopiles | f__ | g__ | s__ |
| New.ReferenceOTU293            | k__Bacteria | p__Cyanobacteria | c__Chloroplast | o__Stramenopiles | f__ | g__ | s__ |
| New.CleanUp.ReferenceOTU101573 | k__Bacteria | p__Cyanobacteria | c__Chloroplast | o__Stramenopiles | f__ | g__ | s__ |
| New.CleanUp.ReferenceOTU100643 | k__Bacteria | p__Cyanobacteria | c__Chloroplast | o__Stramenopiles | f__ | g__ | s__ |
| New.ReferenceOTU442            | k__Bacteria | p__Cyanobacteria | c__Chloroplast | o__Stramenopiles | f__ | g__ | s__ |
| New.ReferenceOTU285            | k__Bacteria | p__Cyanobacteria | c__Chloroplast | o__Stramenopiles | f__ | g__ | s__ |
| New.CleanUp.ReferenceOTU102069 | k__Bacteria | p__Cyanobacteria | c__Chloroplast | o__Stramenopiles | f__ | g__ | s__ |
| 833871                         | k__Bacteria | p__Cyanobacteria | c__Chloroplast | o__Stramenopiles | f__ | g__ | s__ |
| 893745                         | k__Bacteria | p__Cyanobacteria | c__Chloroplast | o__Stramenopiles | f__ | g__ | s__ |
| New.ReferenceOTU124            | k__Bacteria | p__Cyanobacteria | c__Chloroplast | o__Stramenopiles | f__ | g__ | s__ |
| New.CleanUp.ReferenceOTU102252 | k__Bacteria | p__Cyanobacteria | c__Chloroplast | o__Stramenopiles | f__ | g__ | s__ |
| New.CleanUp.ReferenceOTU101835 | k__Bacteria | p__Cyanobacteria | c__Chloroplast | o__Stramenopiles | f__ | g__ | s__ |
| New.CleanUp.ReferenceOTU10206  | k__Bacteria | p__Cyanobacteria | c__Chloroplast | o__Stramenopiles | f__ | g__ | s__ |
| New.CleanUp.ReferenceOTU101622 | k__Bacteria | p__Cyanobacteria | c__Chloroplast | o__Stramenopiles | f__ | g__ | s__ |
| New.ReferenceOTU423            | k__Bacteria | p__Cyanobacteria | c__Chloroplast | o__Stramenopiles | f__ | g__ | s__ |
| New.CleanUp.ReferenceOTU102390 | k__Bacteria | p__Cyanobacteria | c__Chloroplast | o__Stramenopiles | f__ | g__ | s__ |
| New.CleanUp.ReferenceOTU100419 | k__Bacteria | p__Cyanobacteria | c__Chloroplast | o__Stramenopiles | f__ | g__ | s__ |
| New.CleanUp.ReferenceOTU100670 | k__Bacteria | p__Cyanobacteria | c__Chloroplast | o__Stramenopiles | f__ | g__ | s__ |
| 865146                         | k__Bacteria | p__Cyanobacteria | c__Chloroplast | o__Stramenopiles | f__ | g__ | s__ |
| New.ReferenceOTU386            | k__Bacteria | p__Cyanobacteria | c__Chloroplast | o__Stramenopiles | f__ | g__ | s__ |
| 929908                         | k__Bacteria | p__Cyanobacteria | c__Chloroplast | o__Stramenopiles | f__ | g__ | s__ |
| New.CleanUp.ReferenceOTU10187  | k__Bacteria | p__Cyanobacteria | c__Chloroplast | o__Stramenopiles | f__ | g__ | s__ |
| New.CleanUp.ReferenceOTU101643 | k__Bacteria | p__Cyanobacteria | c__Chloroplast | o__Stramenopiles | f__ | g__ | s__ |
| New.CleanUp.ReferenceOTU100284 | k__Bacteria | p__Cyanobacteria | c__Chloroplast | o__Stramenopiles | f__ | g__ | s__ |
| 91725                          | k__Bacteria | p__Cyanobacteria | c__Chloroplast | o__Stramenopiles | f__ | g__ | s__ |
| 988157                         | k__Bacteria | p__Cyanobacteria | c__Chloroplast | o__Stramenopiles | f__ | g__ | s__ |
| 827921                         | k__Bacteria | p__Cyanobacteria | c__Chloroplast | o__Stramenopiles | f__ | g__ | s__ |
| 817300                         | k__Bacteria | p__Cyanobacteria | c__Chloroplast | o__Stramenopiles | f__ | g__ | s__ |
| New.CleanUp.ReferenceOTU101412 | k__Bacteria | p__Cyanobacteria | c__Chloroplast | o__Stramenopiles | f__ | g__ | s__ |
| New.CleanUp.ReferenceOTU100616 | k__Bacteria | p__Cyanobacteria | c__Chloroplast | o__Stramenopiles | f__ | g__ | s__ |
| New.CleanUp.ReferenceOTU100278 | k__Bacteria | p__Cyanobacteria | c__Chloroplast | o__Stramenopiles | f__ | g__ | s__ |
| New.ReferenceOTU369            | k__Bacteria | p__Cyanobacteria | c__Chloroplast | o__Stramenopiles | f__ | g__ | s__ |
| New.ReferenceOTU501            | k__Bacteria | p__Cyanobacteria | c__Chloroplast | o__Stramenopiles | f__ | g__ | s__ |
| New.ReferenceOTU500            | k__Bacteria | p__Cyanobacteria | c__Chloroplast | o__Stramenopiles | f__ | g__ | s__ |

|                                |             |                  |                |                  |     |     |     |
|--------------------------------|-------------|------------------|----------------|------------------|-----|-----|-----|
| 834289                         | k__Bacteria | p__Cyanobacteria | c__Chloroplast | o__Stramenopiles | f__ | g__ | s__ |
| New.ReferenceOTU8              | k__Bacteria | p__Cyanobacteria | c__Chloroplast | o__Stramenopiles | f__ | g__ | s__ |
| 795504                         | k__Bacteria | p__Cyanobacteria | c__Chloroplast | o__Stramenopiles | f__ | g__ | s__ |
| New.CleanUp.ReferenceOTU101246 | k__Bacteria | p__Cyanobacteria | c__Chloroplast | o__Stramenopiles | f__ | g__ | s__ |
| New.ReferenceOTU374            | k__Bacteria | p__Cyanobacteria | c__Chloroplast | o__Stramenopiles | f__ | g__ | s__ |
| New.ReferenceOTU32             | k__Bacteria | p__Cyanobacteria | c__Chloroplast | o__Stramenopiles | f__ | g__ | s__ |
| New.CleanUp.ReferenceOTU101504 | k__Bacteria | p__Cyanobacteria | c__Chloroplast | o__Stramenopiles | f__ | g__ | s__ |
| New.CleanUp.ReferenceOTU101611 | k__Bacteria | p__Cyanobacteria | c__Chloroplast | o__Stramenopiles | f__ | g__ | s__ |
| New.CleanUp.ReferenceOTU101051 | k__Bacteria | p__Cyanobacteria | c__Chloroplast | o__Stramenopiles | f__ | g__ | s__ |
| 746239                         | k__Bacteria | p__Cyanobacteria | c__Chloroplast | o__Stramenopiles | f__ | g__ | s__ |
| New.ReferenceOTU23             | k__Bacteria | p__Cyanobacteria | c__Chloroplast | o__Stramenopiles | f__ | g__ | s__ |
| New.CleanUp.ReferenceOTU102513 | k__Bacteria | p__Cyanobacteria | c__Chloroplast | o__Stramenopiles | f__ | g__ | s__ |
| New.CleanUp.ReferenceOTU101261 | k__Bacteria | p__Cyanobacteria | c__Chloroplast | o__Stramenopiles | f__ | g__ | s__ |
| New.ReferenceOTU532            | k__Bacteria | p__Cyanobacteria | c__Chloroplast | o__Stramenopiles | f__ | g__ | s__ |
| 833743                         | k__Bacteria | p__Cyanobacteria | c__Chloroplast | o__Stramenopiles | f__ | g__ | s__ |
| 786099                         | k__Bacteria | p__Cyanobacteria | c__Chloroplast | o__Stramenopiles | f__ | g__ | s__ |
| New.CleanUp.ReferenceOTU101378 | k__Bacteria | p__Cyanobacteria | c__Chloroplast | o__Stramenopiles | f__ | g__ | s__ |
| New.CleanUp.ReferenceOTU101025 | k__Bacteria | p__Cyanobacteria | c__Chloroplast | o__Stramenopiles | f__ | g__ | s__ |
| New.CleanUp.ReferenceOTU101152 | k__Bacteria | p__Cyanobacteria | c__Chloroplast | o__Stramenopiles | f__ | g__ | s__ |
| New.ReferenceOTU43             | k__Bacteria | p__Cyanobacteria | c__Chloroplast | o__Stramenopiles | f__ | g__ | s__ |
| New.ReferenceOTU246            | k__Bacteria | p__Cyanobacteria | c__Chloroplast | o__Stramenopiles | f__ | g__ | s__ |
| 825656                         | k__Bacteria | p__Cyanobacteria | c__Chloroplast | o__Stramenopiles | f__ | g__ | s__ |
| 765141                         | k__Bacteria | p__Cyanobacteria | c__Chloroplast | o__Stramenopiles | f__ | g__ | s__ |
| New.CleanUp.ReferenceOTU100685 | k__Bacteria | p__Cyanobacteria | c__Chloroplast | o__Stramenopiles | f__ | g__ | s__ |
| New.ReferenceOTU95             | k__Bacteria | p__Cyanobacteria | c__Chloroplast | o__Stramenopiles | f__ | g__ | s__ |
| New.ReferenceOTU304            | k__Bacteria | p__Cyanobacteria | c__Chloroplast | o__Stramenopiles | f__ | g__ | s__ |
| 816408                         | k__Bacteria | p__Cyanobacteria | c__Chloroplast | o__Stramenopiles | f__ | g__ | s__ |
| New.CleanUp.ReferenceOTU10118  | k__Bacteria | p__Cyanobacteria | c__Chloroplast | o__Stramenopiles | f__ | g__ | s__ |
| New.ReferenceOTU475            | k__Bacteria | p__Cyanobacteria | c__Chloroplast | o__Stramenopiles | f__ | g__ | s__ |
| New.ReferenceOTU272            | k__Bacteria | p__Cyanobacteria | c__Chloroplast | o__Stramenopiles | f__ | g__ | s__ |
| New.ReferenceOTU275            | k__Bacteria | p__Cyanobacteria | c__Chloroplast | o__Stramenopiles | f__ | g__ | s__ |
| New.ReferenceOTU68             | k__Bacteria | p__Cyanobacteria | c__Chloroplast | o__Stramenopiles | f__ | g__ | s__ |
| 891804                         | k__Bacteria | p__Cyanobacteria | c__Chloroplast | o__Stramenopiles | f__ | g__ | s__ |
| New.ReferenceOTU88             | k__Bacteria | p__Cyanobacteria | c__Chloroplast | o__Stramenopiles | f__ | g__ | s__ |
| New.ReferenceOTU315            | k__Bacteria | p__Cyanobacteria | c__Chloroplast | o__Stramenopiles | f__ | g__ | s__ |
| New.CleanUp.ReferenceOTU100196 | k__Bacteria | p__Cyanobacteria | c__Chloroplast | o__Stramenopiles | f__ | g__ | s__ |
| New.ReferenceOTU260            | k__Bacteria | p__Cyanobacteria | c__Chloroplast | o__Stramenopiles | f__ | g__ | s__ |



[illegible]

[illegible]

[illegible]

[illegible]

[illegible]

[illegible]

[illegible]

[illegible]





















[illegible]

[illegible]

[illegible]

[illegible]

[illegible]

[illegible]

[illegible]

[illegible]



[illegible]

[illegible]

[illegible]

[illegible]

[illegible]

[illegible]

[illegible]

[illegible]



[illegible]

[illegible]

[illegible]

[illegible]

[illegible]

















































































[illegible]

[illegible]

[illegible]

[illegible]

[illegible]

[illegible]

[illegible]

[illegible]



[illegible]

[illegible]

[illegible]

[illegible]

[illegible]

[illegible]

[illegible]

[illegible]



[illegible]

[illegible]

[illegible]

[illegible]

[illegible]

[illegible]

[illegible]

[illegible]



[illegible]

[illegible]

[illegible]

[illegible]

[illegible]

[illegible]

[illegible]

[illegible]





















[illegible]

|         |             |                   |                        |     |     |     |     |
|---------|-------------|-------------------|------------------------|-----|-----|-----|-----|
| 339760  | k__Bacteria | p__Proteobacteria | c__Alphaproteobacteria | o__ | f__ | g__ | s__ |
| 245677  | k__Bacteria | p__Proteobacteria | c__Alphaproteobacteria | o__ | f__ | g__ | s__ |
| 227866  | k__Bacteria | p__Proteobacteria | c__Alphaproteobacteria | o__ | f__ | g__ | s__ |
| 233950  | k__Bacteria | p__Proteobacteria | c__Alphaproteobacteria | o__ | f__ | g__ | s__ |
| 327275  | k__Bacteria | p__Proteobacteria | c__Alphaproteobacteria | o__ | f__ | g__ | s__ |
| 347853  | k__Bacteria | p__Proteobacteria | c__Alphaproteobacteria | o__ | f__ | g__ | s__ |
| 234239  | k__Bacteria | p__Proteobacteria | c__Alphaproteobacteria | o__ | f__ | g__ | s__ |
| 337256  | k__Bacteria | p__Proteobacteria | c__Alphaproteobacteria | o__ | f__ | g__ | s__ |
| 303711  | k__Bacteria | p__Proteobacteria | c__Alphaproteobacteria | o__ | f__ | g__ | s__ |
| 236651  | k__Bacteria | p__Proteobacteria | c__Alphaproteobacteria | o__ | f__ | g__ | s__ |
| 316736  | k__Bacteria | p__Proteobacteria | c__Alphaproteobacteria | o__ | f__ | g__ | s__ |
| 1115987 | k__Bacteria | p__Proteobacteria | c__Alphaproteobacteria | o__ | f__ | g__ | s__ |
| 11266   | k__Bacteria | p__Proteobacteria | c__Alphaproteobacteria | o__ | f__ | g__ | s__ |
| 317449  | k__Bacteria | p__Proteobacteria | c__Alphaproteobacteria | o__ | f__ | g__ | s__ |
| 237131  | k__Bacteria | p__Proteobacteria | c__Alphaproteobacteria | o__ | f__ | g__ | s__ |
| 314474  | k__Bacteria | p__Proteobacteria | c__Alphaproteobacteria | o__ | f__ | g__ | s__ |
| 320821  | k__Bacteria | p__Proteobacteria | c__Alphaproteobacteria | o__ | f__ | g__ | s__ |
| 313798  | k__Bacteria | p__Proteobacteria | c__Alphaproteobacteria | o__ | f__ | g__ | s__ |
| 123788  | k__Bacteria | p__Proteobacteria | c__Alphaproteobacteria | o__ | f__ | g__ | s__ |
| 317827  | k__Bacteria | p__Proteobacteria | c__Alphaproteobacteria | o__ | f__ | g__ | s__ |
| 243903  | k__Bacteria | p__Proteobacteria | c__Alphaproteobacteria | o__ | f__ | g__ | s__ |
| 277092  | k__Bacteria | p__Proteobacteria | c__Alphaproteobacteria | o__ | f__ | g__ | s__ |
| 247781  | k__Bacteria | p__Proteobacteria | c__Alphaproteobacteria | o__ | f__ | g__ | s__ |
| 1813089 | k__Bacteria | p__Proteobacteria | c__Alphaproteobacteria | o__ | f__ | g__ | s__ |
| 111046  | k__Bacteria | p__Proteobacteria | c__Alphaproteobacteria | o__ | f__ | g__ | s__ |
| 344370  | k__Bacteria | p__Proteobacteria | c__Alphaproteobacteria | o__ | f__ | g__ | s__ |
| 320613  | k__Bacteria | p__Proteobacteria | c__Alphaproteobacteria | o__ | f__ | g__ | s__ |
| 325795  | k__Bacteria | p__Proteobacteria | c__Alphaproteobacteria | o__ | f__ | g__ | s__ |
| 230073  | k__Bacteria | p__Proteobacteria | c__Alphaproteobacteria | o__ | f__ | g__ | s__ |
| 329097  | k__Bacteria | p__Proteobacteria | c__Alphaproteobacteria | o__ | f__ | g__ | s__ |
| 263385  | k__Bacteria | p__Proteobacteria | c__Alphaproteobacteria | o__ | f__ | g__ | s__ |
| 347218  | k__Bacteria | p__Proteobacteria | c__Alphaproteobacteria | o__ | f__ | g__ | s__ |
| 127587  | k__Bacteria | p__Proteobacteria | c__Alphaproteobacteria | o__ | f__ | g__ | s__ |
| 336620  | k__Bacteria | p__Proteobacteria | c__Alphaproteobacteria | o__ | f__ | g__ | s__ |
| 344865  | k__Bacteria | p__Proteobacteria | c__Alphaproteobacteria | o__ | f__ | g__ | s__ |
| 124774  | k__Bacteria | p__Proteobacteria | c__Alphaproteobacteria | o__ | f__ | g__ | s__ |
| 289355  | k__Bacteria | p__Proteobacteria | c__Alphaproteobacteria | o__ | f__ | g__ | s__ |

|                                |             |                   |                        |     |     |     |     |
|--------------------------------|-------------|-------------------|------------------------|-----|-----|-----|-----|
| 304842                         | k__Bacteria | p__Proteobacteria | c__Alphaproteobacteria | o__ | f__ | g__ | s__ |
| 1108577                        | k__Bacteria | p__Proteobacteria | c__Alphaproteobacteria | o__ | f__ | g__ | s__ |
| 1111111                        | k__Bacteria | p__Proteobacteria | c__Alphaproteobacteria | o__ | f__ | g__ | s__ |
| 546944                         | k__Bacteria | p__Proteobacteria | c__Alphaproteobacteria | o__ | f__ | g__ | s__ |
| 60649                          | k__Bacteria | p__Proteobacteria | c__Alphaproteobacteria | o__ | f__ | g__ | s__ |
| 4447845                        | k__Bacteria | p__Proteobacteria | c__Alphaproteobacteria | o__ | f__ | g__ | s__ |
| 580691                         | k__Bacteria | p__Proteobacteria | c__Alphaproteobacteria | o__ | f__ | g__ | s__ |
| 567945                         | k__Bacteria | p__Proteobacteria | c__Alphaproteobacteria | o__ | f__ | g__ | s__ |
| 578143                         | k__Bacteria | p__Proteobacteria | c__Alphaproteobacteria | o__ | f__ | g__ | s__ |
| 60654                          | k__Bacteria | p__Proteobacteria | c__Alphaproteobacteria | o__ | f__ | g__ | s__ |
| 632133                         | k__Bacteria | p__Proteobacteria | c__Alphaproteobacteria | o__ | f__ | g__ | s__ |
| 354873                         | k__Bacteria | p__Proteobacteria | c__Alphaproteobacteria | o__ | f__ | g__ | s__ |
| 581316                         | k__Bacteria | p__Proteobacteria | c__Alphaproteobacteria | o__ | f__ | g__ | s__ |
| 355527                         | k__Bacteria | p__Proteobacteria | c__Alphaproteobacteria | o__ | f__ | g__ | s__ |
| 544626                         | k__Bacteria | p__Proteobacteria | c__Alphaproteobacteria | o__ | f__ | g__ | s__ |
| 538884                         | k__Bacteria | p__Proteobacteria | c__Alphaproteobacteria | o__ | f__ | g__ | s__ |
| 4184607                        | k__Bacteria | p__Proteobacteria | c__Alphaproteobacteria | o__ | f__ | g__ | s__ |
| 4357016                        | k__Bacteria | p__Proteobacteria | c__Alphaproteobacteria | o__ | f__ | g__ | s__ |
| 354693                         | k__Bacteria | p__Proteobacteria | c__Alphaproteobacteria | o__ | f__ | g__ | s__ |
| 543882                         | k__Bacteria | p__Proteobacteria | c__Alphaproteobacteria | o__ | f__ | g__ | s__ |
| 632126                         | k__Bacteria | p__Proteobacteria | c__Alphaproteobacteria | o__ | f__ | g__ | s__ |
| 4453874                        | k__Bacteria | p__Proteobacteria | c__Alphaproteobacteria | o__ | f__ | g__ | s__ |
| 593229                         | k__Bacteria | p__Proteobacteria | c__Alphaproteobacteria | o__ | f__ | g__ | s__ |
| 592269                         | k__Bacteria | p__Proteobacteria | c__Alphaproteobacteria | o__ | f__ | g__ | s__ |
| 4382994                        | k__Bacteria | p__Proteobacteria | c__Alphaproteobacteria | o__ | f__ | g__ | s__ |
| 352252                         | k__Bacteria | p__Proteobacteria | c__Alphaproteobacteria | o__ | f__ | g__ | s__ |
| 349161                         | k__Bacteria | p__Proteobacteria | c__Alphaproteobacteria | o__ | f__ | g__ | s__ |
| 4425766                        | k__Bacteria | p__Proteobacteria | c__Alphaproteobacteria | o__ | f__ | g__ | s__ |
| 583912                         | k__Bacteria | p__Proteobacteria | c__Alphaproteobacteria | o__ | f__ | g__ | s__ |
| 546060                         | k__Bacteria | p__Proteobacteria | c__Alphaproteobacteria | o__ | f__ | g__ | s__ |
| 356368                         | k__Bacteria | p__Proteobacteria | c__Alphaproteobacteria | o__ | f__ | g__ | s__ |
| 644018                         | k__Bacteria | p__Proteobacteria | c__Alphaproteobacteria | o__ | f__ | g__ | s__ |
| 550871                         | k__Bacteria | p__Proteobacteria | c__Alphaproteobacteria | o__ | f__ | g__ | s__ |
| New.CleanUp.ReferenceOTU10007  | k__Bacteria | p__Proteobacteria | c__Alphaproteobacteria | o__ | f__ | g__ | s__ |
| 830414                         | k__Bacteria | p__Proteobacteria | c__Alphaproteobacteria | o__ | f__ | g__ | s__ |
| New.ReferenceOTU103            | k__Bacteria | p__Proteobacteria | c__Alphaproteobacteria | o__ | f__ | g__ | s__ |
| New.CleanUp.ReferenceOTU101802 | k__Bacteria | p__Proteobacteria | c__Alphaproteobacteria | o__ | f__ | g__ | s__ |

[illegible]

[illegible]

[illegible]

[illegible]

[illegible]



[illegible]

[illegible]

[illegible]

[illegible]

[illegible]

[illegible]

|         |            |                  |                  |                |                 |    |    |
|---------|------------|------------------|------------------|----------------|-----------------|----|----|
| 1897002 | k_Bacteria | p_Planctomycetes | c_Planctomycetia | o_Pirellulales | f_Pirellulaceae | g_ | s_ |
| 2777    | k_Bacteria | p_Planctomycetes | c_Planctomycetia | o_Pirellulales | f_Pirellulaceae | g_ | s_ |
| 173437  | k_Bacteria | p_Planctomycetes | c_Planctomycetia | o_Pirellulales | f_Pirellulaceae | g_ | s_ |
| 246979  | k_Bacteria | p_Planctomycetes | c_Planctomycetia | o_Pirellulales | f_Pirellulaceae | g_ | s_ |
| 1111513 | k_Bacteria | p_Planctomycetes | c_Planctomycetia | o_Pirellulales | f_Pirellulaceae | g_ | s_ |
| 263866  | k_Bacteria | p_Planctomycetes | c_Planctomycetia | o_Pirellulales | f_Pirellulaceae | g_ | s_ |
| 3423659 | k_Bacteria | p_Planctomycetes | c_Planctomycetia | o_Pirellulales | f_Pirellulaceae | g_ | s_ |
| 167808  | k_Bacteria | p_Planctomycetes | c_Planctomycetia | o_Pirellulales | f_Pirellulaceae | g_ | s_ |
| 150691  | k_Bacteria | p_Planctomycetes | c_Planctomycetia | o_Pirellulales | f_Pirellulaceae | g_ | s_ |
| 245163  | k_Bacteria | p_Planctomycetes | c_Planctomycetia | o_Pirellulales | f_Pirellulaceae | g_ | s_ |
| 3390990 | k_Bacteria | p_Planctomycetes | c_Planctomycetia | o_Pirellulales | f_Pirellulaceae | g_ | s_ |
| 2793    | k_Bacteria | p_Planctomycetes | c_Planctomycetia | o_Pirellulales | f_Pirellulaceae | g_ | s_ |
| 252268  | k_Bacteria | p_Planctomycetes | c_Planctomycetia | o_Pirellulales | f_Pirellulaceae | g_ | s_ |
| 2813    | k_Bacteria | p_Planctomycetes | c_Planctomycetia | o_Pirellulales | f_Pirellulaceae | g_ | s_ |
| 4393300 | k_Bacteria | p_Planctomycetes | c_Planctomycetia | o_Pirellulales | f_Pirellulaceae | g_ | s_ |
| 69770   | k_Bacteria | p_Planctomycetes | c_Planctomycetia | o_Pirellulales | f_Pirellulaceae | g_ | s_ |
| 539493  | k_Bacteria | p_Planctomycetes | c_Planctomycetia | o_Pirellulales | f_Pirellulaceae | g_ | s_ |
| 4323373 | k_Bacteria | p_Planctomycetes | c_Planctomycetia | o_Pirellulales | f_Pirellulaceae | g_ | s_ |
| 4408871 | k_Bacteria | p_Planctomycetes | c_Planctomycetia | o_Pirellulales | f_Pirellulaceae | g_ | s_ |
| 4460376 | k_Bacteria | p_Planctomycetes | c_Planctomycetia | o_Pirellulales | f_Pirellulaceae | g_ | s_ |
| 591115  | k_Bacteria | p_Planctomycetes | c_Planctomycetia | o_Pirellulales | f_Pirellulaceae | g_ | s_ |
| 4319491 | k_Bacteria | p_Planctomycetes | c_Planctomycetia | o_Pirellulales | f_Pirellulaceae | g_ | s_ |
| 4102516 | k_Bacteria | p_Planctomycetes | c_Planctomycetia | o_Pirellulales | f_Pirellulaceae | g_ | s_ |
| 628299  | k_Bacteria | p_Planctomycetes | c_Planctomycetia | o_Pirellulales | f_Pirellulaceae | g_ | s_ |
| 4420326 | k_Bacteria | p_Planctomycetes | c_Planctomycetia | o_Pirellulales | f_Pirellulaceae | g_ | s_ |
| 4436883 | k_Bacteria | p_Planctomycetes | c_Planctomycetia | o_Pirellulales | f_Pirellulaceae | g_ | s_ |
| 3887094 | k_Bacteria | p_Planctomycetes | c_Planctomycetia | o_Pirellulales | f_Pirellulaceae | g_ | s_ |
| 4095168 | k_Bacteria | p_Planctomycetes | c_Planctomycetia | o_Pirellulales | f_Pirellulaceae | g_ | s_ |
| 4437176 | k_Bacteria | p_Planctomycetes | c_Planctomycetia | o_Pirellulales | f_Pirellulaceae | g_ | s_ |
| 569946  | k_Bacteria | p_Planctomycetes | c_Planctomycetia | o_Pirellulales | f_Pirellulaceae | g_ | s_ |
| 586939  | k_Bacteria | p_Planctomycetes | c_Planctomycetia | o_Pirellulales | f_Pirellulaceae | g_ | s_ |
| 543167  | k_Bacteria | p_Planctomycetes | c_Planctomycetia | o_Pirellulales | f_Pirellulaceae | g_ | s_ |
| 693641  | k_Bacteria | p_Planctomycetes | c_Planctomycetia | o_Pirellulales | f_Pirellulaceae | g_ | s_ |
| 399640  | k_Bacteria | p_Planctomycetes | c_Planctomycetia | o_Pirellulales | f_Pirellulaceae | g_ | s_ |
| 4417972 | k_Bacteria | p_Planctomycetes | c_Planctomycetia | o_Pirellulales | f_Pirellulaceae | g_ | s_ |
| 4423663 | k_Bacteria | p_Planctomycetes | c_Planctomycetia | o_Pirellulales | f_Pirellulaceae | g_ | s_ |
| 531452  | k_Bacteria | p_Planctomycetes | c_Planctomycetia | o_Pirellulales | f_Pirellulaceae | g_ | s_ |

[illegible]



[illegible]

[illegible]

[illegible]

[illegible]

[illegible]

[illegible]

[illegible]

[illegible]



[illegible]

[illegible]

[illegible]

|                                |             |                   |                   |                 |                     |     |     |
|--------------------------------|-------------|-------------------|-------------------|-----------------|---------------------|-----|-----|
| New.CleanUp.ReferenceOTU96512  | k__Bacteria | p__Planctomycetes | c__Planctomycetia | o__Pirellulales | f__Pirellulaceae    | g__ | s__ |
| New.CleanUp.ReferenceOTU96173  | k__Bacteria | p__Planctomycetes | c__Planctomycetia | o__Pirellulales | f__Pirellulaceae    | g__ | s__ |
| New.CleanUp.ReferenceOTU95997  | k__Bacteria | p__Planctomycetes | c__Planctomycetia | o__Pirellulales | f__Pirellulaceae    | g__ | s__ |
| New.CleanUp.ReferenceOTU97761  | k__Bacteria | p__Planctomycetes | c__Planctomycetia | o__Pirellulales | f__Pirellulaceae    | g__ | s__ |
| 2380278                        | k__Archaea  | p__Euryarchaeota  | c__Thermoplasmata | o__E2           | f__Marine group II  | g__ | s__ |
| 1524871                        | k__Archaea  | p__Euryarchaeota  | c__Thermoplasmata | o__E2           | f__Marine group II  | g__ | s__ |
| 250570                         | k__Archaea  | p__Euryarchaeota  | c__Thermoplasmata | o__E2           | f__Marine group II  | g__ | s__ |
| 2383442                        | k__Archaea  | p__Euryarchaeota  | c__Thermoplasmata | o__E2           | f__Marine group II  | g__ | s__ |
| 1100313                        | k__Archaea  | p__Euryarchaeota  | c__Thermoplasmata | o__E2           | f__Marine group II  | g__ | s__ |
| 1642861                        | k__Archaea  | p__Euryarchaeota  | c__Thermoplasmata | o__E2           | f__Marine group II  | g__ | s__ |
| 1014380                        | k__Archaea  | p__Euryarchaeota  | c__Thermoplasmata | o__E2           | f__Marine group II  | g__ | s__ |
| 112246                         | k__Archaea  | p__Euryarchaeota  | c__Thermoplasmata | o__E2           | f__Marine group II  | g__ | s__ |
| 110525                         | k__Archaea  | p__Euryarchaeota  | c__Thermoplasmata | o__E2           | f__Marine group III | g__ | s__ |
| 104364                         | k__Archaea  | p__Euryarchaeota  | c__Thermoplasmata | o__E2           | f__Marine group II  | g__ | s__ |
| 1547121                        | k__Archaea  | p__Euryarchaeota  | c__Thermoplasmata | o__E2           | f__Marine group II  | g__ | s__ |
| 147038                         | k__Archaea  | p__Euryarchaeota  | c__Thermoplasmata | o__E2           | f__Marine group II  | g__ | s__ |
| 146866                         | k__Archaea  | p__Euryarchaeota  | c__Thermoplasmata | o__E2           | f__Marine group II  | g__ | s__ |
| 2775893                        | k__Archaea  | p__Euryarchaeota  | c__Thermoplasmata | o__E2           | f__Marine group II  | g__ | s__ |
| 149368                         | k__Archaea  | p__Euryarchaeota  | c__Thermoplasmata | o__E2           | f__Marine group II  | g__ | s__ |
| 2781721                        | k__Archaea  | p__Euryarchaeota  | c__Thermoplasmata | o__E2           | f__Marine group II  | g__ | s__ |
| 285041                         | k__Archaea  | p__Euryarchaeota  | c__Thermoplasmata | o__E2           | f__Marine group II  | g__ | s__ |
| 147786                         | k__Archaea  | p__Euryarchaeota  | c__Thermoplasmata | o__E2           | f__Marine group II  | g__ | s__ |
| 1921157                        | k__Archaea  | p__Euryarchaeota  | c__Thermoplasmata | o__E2           | f__Marine group II  | g__ | s__ |
| 4032754                        | k__Archaea  | p__Euryarchaeota  | c__Thermoplasmata | o__E2           | f__Marine group II  | g__ | s__ |
| 4394385                        | k__Archaea  | p__Euryarchaeota  | c__Thermoplasmata | o__E2           | f__Marine group II  | g__ | s__ |
| 4324777                        | k__Archaea  | p__Euryarchaeota  | c__Thermoplasmata | o__E2           | f__Marine group II  | g__ | s__ |
| 3597424                        | k__Archaea  | p__Euryarchaeota  | c__Thermoplasmata | o__E2           | f__Marine group II  | g__ | s__ |
| 4462888                        | k__Archaea  | p__Euryarchaeota  | c__Thermoplasmata | o__E2           | f__Marine group II  | g__ | s__ |
| 4462887                        | k__Archaea  | p__Euryarchaeota  | c__Thermoplasmata | o__E2           | f__Marine group II  | g__ | s__ |
| 3733204                        | k__Archaea  | p__Euryarchaeota  | c__Thermoplasmata | o__E2           | f__Marine group II  | g__ | s__ |
| 4418192                        | k__Archaea  | p__Euryarchaeota  | c__Thermoplasmata | o__E2           | f__Marine group II  | g__ | s__ |
| 4394387                        | k__Archaea  | p__Euryarchaeota  | c__Thermoplasmata | o__E2           | f__Marine group II  | g__ | s__ |
| 4428688                        | k__Archaea  | p__Euryarchaeota  | c__Thermoplasmata | o__E2           | f__Marine group II  | g__ | s__ |
| 351294                         | k__Archaea  | p__Euryarchaeota  | c__Thermoplasmata | o__E2           | f__Marine group II  | g__ | s__ |
| 688231                         | k__Archaea  | p__Euryarchaeota  | c__Thermoplasmata | o__E2           | f__Marine group II  | g__ | s__ |
| New.CleanUp.ReferenceOTU101434 | k__Archaea  | p__Euryarchaeota  | c__Thermoplasmata | o__E2           | f__Marine group II  | g__ | s__ |
| New.ReferenceOTU143            | k__Archaea  | p__Euryarchaeota  | c__Thermoplasmata | o__E2           | f__Marine group II  | g__ | s__ |

[illegible]

[illegible]

[illegible]

[illegible]



|                                |             |                  |                   |                |                    |            |     |
|--------------------------------|-------------|------------------|-------------------|----------------|--------------------|------------|-----|
| New.CleanUp.ReferenceOTU80753  | k__Archaea  | p__Euryarchaeota | c__Thermoplasmata | o__E2          | f__Marine group II | g__        | s__ |
| New.CleanUp.ReferenceOTU78683  | k__Archaea  | p__Euryarchaeota | c__Thermoplasmata | o__E2          | f__Marine group II | g__        | s__ |
| New.CleanUp.ReferenceOTU80677  | k__Archaea  | p__Euryarchaeota | c__Thermoplasmata | o__E2          | f__Marine group II | g__        | s__ |
| New.CleanUp.ReferenceOTU90852  | k__Archaea  | p__Euryarchaeota | c__Thermoplasmata | o__E2          | f__Marine group II | g__        | s__ |
| New.CleanUp.ReferenceOTU8595   | k__Archaea  | p__Euryarchaeota | c__Thermoplasmata | o__E2          | f__Marine group II | g__        | s__ |
| New.CleanUp.ReferenceOTU89845  | k__Archaea  | p__Euryarchaeota | c__Thermoplasmata | o__E2          | f__Marine group II | g__        | s__ |
| New.CleanUp.ReferenceOTU91083  | k__Archaea  | p__Euryarchaeota | c__Thermoplasmata | o__E2          | f__Marine group II | g__        | s__ |
| New.CleanUp.ReferenceOTU90747  | k__Archaea  | p__Euryarchaeota | c__Thermoplasmata | o__E2          | f__Marine group II | g__        | s__ |
| New.CleanUp.ReferenceOTU88613  | k__Archaea  | p__Euryarchaeota | c__Thermoplasmata | o__E2          | f__Marine group II | g__        | s__ |
| New.CleanUp.ReferenceOTU9046   | k__Archaea  | p__Euryarchaeota | c__Thermoplasmata | o__E2          | f__Marine group II | g__        | s__ |
| New.CleanUp.ReferenceOTU92475  | k__Archaea  | p__Euryarchaeota | c__Thermoplasmata | o__E2          | f__Marine group II | g__        | s__ |
| New.CleanUp.ReferenceOTU92402  | k__Archaea  | p__Euryarchaeota | c__Thermoplasmata | o__E2          | f__Marine group II | g__        | s__ |
| New.CleanUp.ReferenceOTU87627  | k__Archaea  | p__Euryarchaeota | c__Thermoplasmata | o__E2          | f__Marine group II | g__        | s__ |
| New.CleanUp.ReferenceOTU98302  | k__Archaea  | p__Euryarchaeota | c__Thermoplasmata | o__E2          | f__Marine group II | g__        | s__ |
| New.CleanUp.ReferenceOTU92972  | k__Archaea  | p__Euryarchaeota | c__Thermoplasmata | o__E2          | f__Marine group II | g__        | s__ |
| New.CleanUp.ReferenceOTU95067  | k__Archaea  | p__Euryarchaeota | c__Thermoplasmata | o__E2          | f__Marine group II | g__        | s__ |
| 127240                         | k__Bacteria | p__SAR406        | c__AB16           | o__Arctic96B-7 | f__A714017         | g__ZA3312c | s__ |
| 227717                         | k__Bacteria | p__SAR406        | c__AB16           | o__Arctic96B-7 | f__A714017         | g__ZA3312c | s__ |
| 229118                         | k__Bacteria | p__SAR406        | c__AB16           | o__Arctic96B-7 | f__A714017         | g__ZA3312c | s__ |
| 830400                         | k__Bacteria | p__SAR406        | c__AB16           | o__Arctic96B-7 | f__A714017         | g__ZA3312c | s__ |
| New.ReferenceOTU142            | k__Bacteria | p__SAR406        | c__AB16           | o__Arctic96B-7 | f__A714017         | g__ZA3312c | s__ |
| 79575                          | k__Bacteria | p__SAR406        | c__AB16           | o__Arctic96B-7 | f__A714017         | g__ZA3312c | s__ |
| New.CleanUp.ReferenceOTU100469 | k__Bacteria | p__SAR406        | c__AB16           | o__Arctic96B-7 | f__A714017         | g__ZA3312c | s__ |
| 822413                         | k__Bacteria | p__SAR406        | c__AB16           | o__Arctic96B-7 | f__A714017         | g__ZA3312c | s__ |
| New.CleanUp.ReferenceOTU104087 | k__Bacteria | p__SAR406        | c__AB16           | o__Arctic96B-7 | f__A714017         | g__ZA3312c | s__ |
| New.CleanUp.ReferenceOTU109410 | k__Bacteria | p__SAR406        | c__AB16           | o__Arctic96B-7 | f__A714017         | g__ZA3312c | s__ |
| New.CleanUp.ReferenceOTU105350 | k__Bacteria | p__SAR406        | c__AB16           | o__Arctic96B-7 | f__A714017         | g__ZA3312c | s__ |
| New.CleanUp.ReferenceOTU107229 | k__Bacteria | p__SAR406        | c__AB16           | o__Arctic96B-7 | f__A714017         | g__ZA3312c | s__ |
| New.CleanUp.ReferenceOTU108497 | k__Bacteria | p__SAR406        | c__AB16           | o__Arctic96B-7 | f__A714017         | g__ZA3312c | s__ |
| New.CleanUp.ReferenceOTU106241 | k__Bacteria | p__SAR406        | c__AB16           | o__Arctic96B-7 | f__A714017         | g__ZA3312c | s__ |
| New.CleanUp.ReferenceOTU107272 | k__Bacteria | p__SAR406        | c__AB16           | o__Arctic96B-7 | f__A714017         | g__ZA3312c | s__ |
| New.CleanUp.ReferenceOTU104206 | k__Bacteria | p__SAR406        | c__AB16           | o__Arctic96B-7 | f__A714017         | g__ZA3312c | s__ |
| New.CleanUp.ReferenceOTU109806 | k__Bacteria | p__SAR406        | c__AB16           | o__Arctic96B-7 | f__A714017         | g__ZA3312c | s__ |
| New.CleanUp.ReferenceOTU106929 | k__Bacteria | p__SAR406        | c__AB16           | o__Arctic96B-7 | f__A714017         | g__ZA3312c | s__ |
| New.CleanUp.ReferenceOTU115134 | k__Bacteria | p__SAR406        | c__AB16           | o__Arctic96B-7 | f__A714017         | g__ZA3312c | s__ |
| New.CleanUp.ReferenceOTU116038 | k__Bacteria | p__SAR406        | c__AB16           | o__Arctic96B-7 | f__A714017         | g__ZA3312c | s__ |
| New.CleanUp.ReferenceOTU116463 | k__Bacteria | p__SAR406        | c__AB16           | o__Arctic96B-7 | f__A714017         | g__ZA3312c | s__ |

[illegible]

[illegible]

[illegible]

|                                |             |                   |                        |                      |            |            |     |
|--------------------------------|-------------|-------------------|------------------------|----------------------|------------|------------|-----|
| New.CleanUp.ReferenceOTU86945  | k__Bacteria | p__SAR406         | c__AB16                | o__Arctic96B-7       | f__A714017 | g__ZA3312c | s__ |
| New.CleanUp.ReferenceOTU89129  | k__Bacteria | p__SAR406         | c__AB16                | o__Arctic96B-7       | f__A714017 | g__ZA3312c | s__ |
| New.CleanUp.ReferenceOTU94505  | k__Bacteria | p__SAR406         | c__AB16                | o__Arctic96B-7       | f__A714017 | g__ZA3312c | s__ |
| New.CleanUp.ReferenceOTU93423  | k__Bacteria | p__SAR406         | c__AB16                | o__Arctic96B-7       | f__A714017 | g__ZA3312c | s__ |
| New.CleanUp.ReferenceOTU9991   | k__Bacteria | p__SAR406         | c__AB16                | o__Arctic96B-7       | f__A714017 | g__ZA3312c | s__ |
| New.CleanUp.ReferenceOTU99414  | k__Bacteria | p__SAR406         | c__AB16                | o__Arctic96B-7       | f__A714017 | g__ZA3312c | s__ |
| New.CleanUp.ReferenceOTU95199  | k__Bacteria | p__SAR406         | c__AB16                | o__Arctic96B-7       | f__A714017 | g__ZA3312c | s__ |
| 1712364                        | k__Bacteria | p__Proteobacteria | c__Gammaproteobacteria | o__Oceanospirillales | f__        | g__        | s__ |
| 1112543                        | k__Bacteria | p__Proteobacteria | c__Gammaproteobacteria | o__Oceanospirillales | f__        | g__        | s__ |
| 257069                         | k__Bacteria | p__Proteobacteria | c__Gammaproteobacteria | o__Oceanospirillales | f__        | g__        | s__ |
| 274135                         | k__Bacteria | p__Proteobacteria | c__Gammaproteobacteria | o__Oceanospirillales | f__        | g__        | s__ |
| 213080                         | k__Bacteria | p__Proteobacteria | c__Gammaproteobacteria | o__Oceanospirillales | f__        | g__        | s__ |
| 255543                         | k__Bacteria | p__Proteobacteria | c__Gammaproteobacteria | o__Oceanospirillales | f__        | g__        | s__ |
| 247229                         | k__Bacteria | p__Proteobacteria | c__Gammaproteobacteria | o__Oceanospirillales | f__        | g__        | s__ |
| 582861                         | k__Bacteria | p__Proteobacteria | c__Gammaproteobacteria | o__Oceanospirillales | f__        | g__        | s__ |
| 581514                         | k__Bacteria | p__Proteobacteria | c__Gammaproteobacteria | o__Oceanospirillales | f__        | g__        | s__ |
| 354518                         | k__Bacteria | p__Proteobacteria | c__Gammaproteobacteria | o__Oceanospirillales | f__        | g__        | s__ |
| 547808                         | k__Bacteria | p__Proteobacteria | c__Gammaproteobacteria | o__Oceanospirillales | f__        | g__        | s__ |
| 535589                         | k__Bacteria | p__Proteobacteria | c__Gammaproteobacteria | o__Oceanospirillales | f__        | g__        | s__ |
| 589767                         | k__Bacteria | p__Proteobacteria | c__Gammaproteobacteria | o__Oceanospirillales | f__        | g__        | s__ |
| 573691                         | k__Bacteria | p__Proteobacteria | c__Gammaproteobacteria | o__Oceanospirillales | f__        | g__        | s__ |
| 559320                         | k__Bacteria | p__Proteobacteria | c__Gammaproteobacteria | o__Oceanospirillales | f__        | g__        | s__ |
| 542922                         | k__Bacteria | p__Proteobacteria | c__Gammaproteobacteria | o__Oceanospirillales | f__        | g__        | s__ |
| 722984                         | k__Bacteria | p__Proteobacteria | c__Gammaproteobacteria | o__Oceanospirillales | f__        | g__        | s__ |
| 573977                         | k__Bacteria | p__Proteobacteria | c__Gammaproteobacteria | o__Oceanospirillales | f__        | g__        | s__ |
| 4306324                        | k__Bacteria | p__Proteobacteria | c__Gammaproteobacteria | o__Oceanospirillales | f__        | g__        | s__ |
| 567623                         | k__Bacteria | p__Proteobacteria | c__Gammaproteobacteria | o__Oceanospirillales | f__        | g__        | s__ |
| 568706                         | k__Bacteria | p__Proteobacteria | c__Gammaproteobacteria | o__Oceanospirillales | f__        | g__        | s__ |
| 4481997                        | k__Bacteria | p__Proteobacteria | c__Gammaproteobacteria | o__Oceanospirillales | f__        | g__        | s__ |
| 41094                          | k__Bacteria | p__Proteobacteria | c__Gammaproteobacteria | o__Oceanospirillales | f__        | g__        | s__ |
| 70494                          | k__Bacteria | p__Proteobacteria | c__Gammaproteobacteria | o__Oceanospirillales | f__        | g__        | s__ |
| New.CleanUp.ReferenceOTU102019 | k__Bacteria | p__Proteobacteria | c__Gammaproteobacteria | o__Oceanospirillales | f__        | g__        | s__ |
| 837781                         | k__Bacteria | p__Proteobacteria | c__Gammaproteobacteria | o__Oceanospirillales | f__        | g__        | s__ |
| New.ReferenceOTU590            | k__Bacteria | p__Proteobacteria | c__Gammaproteobacteria | o__Oceanospirillales | f__        | g__        | s__ |
| New.ReferenceOTU283            | k__Bacteria | p__Proteobacteria | c__Gammaproteobacteria | o__Oceanospirillales | f__        | g__        | s__ |
| New.CleanUp.ReferenceOTU102444 | k__Bacteria | p__Proteobacteria | c__Gammaproteobacteria | o__Oceanospirillales | f__        | g__        | s__ |
| New.CleanUp.ReferenceOTU102016 | k__Bacteria | p__Proteobacteria | c__Gammaproteobacteria | o__Oceanospirillales | f__        | g__        | s__ |

[illegible]

[illegible]

[illegible]



[illegible]

[illegible]

[illegible]

[illegible]

[illegible]

[illegible]

[illegible]

[illegible]



[illegible]

[illegible]

[illegible]

[illegible]

[illegible]

|                                |             |                  |                |                 |     |     |     |
|--------------------------------|-------------|------------------|----------------|-----------------|-----|-----|-----|
| 1102212                        | k__Bacteria | p__Cyanobacteria | c__Chloroplast | o__Haptophyceae | f__ | g__ | s__ |
| 1799396                        | k__Bacteria | p__Cyanobacteria | c__Chloroplast | o__Haptophyceae | f__ | g__ | s__ |
| 229102                         | k__Bacteria | p__Cyanobacteria | c__Chloroplast | o__Haptophyceae | f__ | g__ | s__ |
| 233100                         | k__Bacteria | p__Cyanobacteria | c__Chloroplast | o__Haptophyceae | f__ | g__ | s__ |
| 229165                         | k__Bacteria | p__Cyanobacteria | c__Chloroplast | o__Haptophyceae | f__ | g__ | s__ |
| 229766                         | k__Bacteria | p__Cyanobacteria | c__Chloroplast | o__Haptophyceae | f__ | g__ | s__ |
| 3372085                        | k__Bacteria | p__Cyanobacteria | c__Chloroplast | o__Haptophyceae | f__ | g__ | s__ |
| 351106                         | k__Bacteria | p__Cyanobacteria | c__Chloroplast | o__Haptophyceae | f__ | g__ | s__ |
| 673756                         | k__Bacteria | p__Cyanobacteria | c__Chloroplast | o__Haptophyceae | f__ | g__ | s__ |
| 646279                         | k__Bacteria | p__Cyanobacteria | c__Chloroplast | o__Haptophyceae | f__ | g__ | s__ |
| 587965                         | k__Bacteria | p__Cyanobacteria | c__Chloroplast | o__Haptophyceae | f__ | g__ | s__ |
| 590118                         | k__Bacteria | p__Cyanobacteria | c__Chloroplast | o__Haptophyceae | f__ | g__ | s__ |
| 831421                         | k__Bacteria | p__Cyanobacteria | c__Chloroplast | o__Haptophyceae | f__ | g__ | s__ |
| 830253                         | k__Bacteria | p__Cyanobacteria | c__Chloroplast | o__Haptophyceae | f__ | g__ | s__ |
| New.CleanUp.ReferenceOTU101128 | k__Bacteria | p__Cyanobacteria | c__Chloroplast | o__Haptophyceae | f__ | g__ | s__ |
| 837770                         | k__Bacteria | p__Cyanobacteria | c__Chloroplast | o__Haptophyceae | f__ | g__ | s__ |
| 829438                         | k__Bacteria | p__Cyanobacteria | c__Chloroplast | o__Haptophyceae | f__ | g__ | s__ |
| 828880                         | k__Bacteria | p__Cyanobacteria | c__Chloroplast | o__Haptophyceae | f__ | g__ | s__ |
| New.CleanUp.ReferenceOTU101728 | k__Bacteria | p__Cyanobacteria | c__Chloroplast | o__Haptophyceae | f__ | g__ | s__ |
| 837749                         | k__Bacteria | p__Cyanobacteria | c__Chloroplast | o__Haptophyceae | f__ | g__ | s__ |
| New.ReferenceOTU398            | k__Bacteria | p__Cyanobacteria | c__Chloroplast | o__Haptophyceae | f__ | g__ | s__ |
| 826143                         | k__Bacteria | p__Cyanobacteria | c__Chloroplast | o__Haptophyceae | f__ | g__ | s__ |
| New.ReferenceOTU508            | k__Bacteria | p__Cyanobacteria | c__Chloroplast | o__Haptophyceae | f__ | g__ | s__ |
| New.ReferenceOTU377            | k__Bacteria | p__Cyanobacteria | c__Chloroplast | o__Haptophyceae | f__ | g__ | s__ |
| 833961                         | k__Bacteria | p__Cyanobacteria | c__Chloroplast | o__Haptophyceae | f__ | g__ | s__ |
| New.CleanUp.ReferenceOTU102434 | k__Bacteria | p__Cyanobacteria | c__Chloroplast | o__Haptophyceae | f__ | g__ | s__ |
| 826653                         | k__Bacteria | p__Cyanobacteria | c__Chloroplast | o__Haptophyceae | f__ | g__ | s__ |
| 826430                         | k__Bacteria | p__Cyanobacteria | c__Chloroplast | o__Haptophyceae | f__ | g__ | s__ |
| 832816                         | k__Bacteria | p__Cyanobacteria | c__Chloroplast | o__Haptophyceae | f__ | g__ | s__ |
| New.CleanUp.ReferenceOTU10485  | k__Bacteria | p__Cyanobacteria | c__Chloroplast | o__Haptophyceae | f__ | g__ | s__ |
| New.CleanUp.ReferenceOTU106749 | k__Bacteria | p__Cyanobacteria | c__Chloroplast | o__Haptophyceae | f__ | g__ | s__ |
| New.CleanUp.ReferenceOTU10982  | k__Bacteria | p__Cyanobacteria | c__Chloroplast | o__Haptophyceae | f__ | g__ | s__ |
| New.CleanUp.ReferenceOTU10543  | k__Bacteria | p__Cyanobacteria | c__Chloroplast | o__Haptophyceae | f__ | g__ | s__ |
| New.CleanUp.ReferenceOTU103244 | k__Bacteria | p__Cyanobacteria | c__Chloroplast | o__Haptophyceae | f__ | g__ | s__ |
| New.CleanUp.ReferenceOTU103223 | k__Bacteria | p__Cyanobacteria | c__Chloroplast | o__Haptophyceae | f__ | g__ | s__ |
| New.CleanUp.ReferenceOTU104016 | k__Bacteria | p__Cyanobacteria | c__Chloroplast | o__Haptophyceae | f__ | g__ | s__ |
| New.CleanUp.ReferenceOTU106621 | k__Bacteria | p__Cyanobacteria | c__Chloroplast | o__Haptophyceae | f__ | g__ | s__ |

[illegible]

[illegible]



[illegible]

[illegible]

[illegible]

[illegible]

[illegible]

[illegible]

[illegible]

[illegible]



[illegible]

[illegible]







[illegible]



[illegible]



[illegible]

[illegible]

[illegible]

[illegible]

[illegible]

[illegible]

[illegible]

[illegible]



[illegible]

[illegible]

[illegible]

[illegible]

[illegible]

[illegible]







[illegible]

[illegible]

[illegible]

[illegible]

[illegible]

[illegible]

[illegible]

[illegible]



[illegible]

[illegible]

[illegible]

[illegible]

[illegible]

[illegible]

[illegible]

[illegible]



[illegible]

[illegible]

[illegible]

[illegible]

[illegible]

[illegible]

[illegible]

[illegible]



|                                |            |              |           |                   |                    |                 |    |
|--------------------------------|------------|--------------|-----------|-------------------|--------------------|-----------------|----|
| 553352                         | k_Bacteria | p_Firmicutes | c_Bacilli | o_Lactobacillales | f_Lactobacillaceae | g_Lactobacillus | s_ |
| 536754                         | k_Bacteria | p_Firmicutes | c_Bacilli | o_Lactobacillales | f_Lactobacillaceae | g_Lactobacillus | s_ |
| 433676                         | k_Bacteria | p_Firmicutes | c_Bacilli | o_Lactobacillales | f_Lactobacillaceae | g_Lactobacillus | s_ |
| 463361                         | k_Bacteria | p_Firmicutes | c_Bacilli | o_Lactobacillales | f_Lactobacillaceae | g_Lactobacillus | s_ |
| 549756                         | k_Bacteria | p_Firmicutes | c_Bacilli | o_Lactobacillales | f_Lactobacillaceae | g_Lactobacillus | s_ |
| 3946926                        | k_Bacteria | p_Firmicutes | c_Bacilli | o_Lactobacillales | f_Lactobacillaceae | g_Lactobacillus | s_ |
| 703741                         | k_Bacteria | p_Firmicutes | c_Bacilli | o_Lactobacillales | f_Lactobacillaceae | g_Lactobacillus | s_ |
| 4416659                        | k_Bacteria | p_Firmicutes | c_Bacilli | o_Lactobacillales | f_Lactobacillaceae | g_Lactobacillus | s_ |
| 577716                         | k_Bacteria | p_Firmicutes | c_Bacilli | o_Lactobacillales | f_Lactobacillaceae | g_Lactobacillus | s_ |
| 463794                         | k_Bacteria | p_Firmicutes | c_Bacilli | o_Lactobacillales | f_Lactobacillaceae | g_Lactobacillus | s_ |
| 538223                         | k_Bacteria | p_Firmicutes | c_Bacilli | o_Lactobacillales | f_Lactobacillaceae | g_Lactobacillus | s_ |
| 589114                         | k_Bacteria | p_Firmicutes | c_Bacilli | o_Lactobacillales | f_Lactobacillaceae | g_Lactobacillus | s_ |
| 456393                         | k_Bacteria | p_Firmicutes | c_Bacilli | o_Lactobacillales | f_Lactobacillaceae | g_Lactobacillus | s_ |
| 4321285                        | k_Bacteria | p_Firmicutes | c_Bacilli | o_Lactobacillales | f_Lactobacillaceae | g_Lactobacillus | s_ |
| 354905                         | k_Bacteria | p_Firmicutes | c_Bacilli | o_Lactobacillales | f_Lactobacillaceae | g_Lactobacillus | s_ |
| 588197                         | k_Bacteria | p_Firmicutes | c_Bacilli | o_Lactobacillales | f_Lactobacillaceae | g_Lactobacillus | s_ |
| 354971                         | k_Bacteria | p_Firmicutes | c_Bacilli | o_Lactobacillales | f_Lactobacillaceae | g_Lactobacillus | s_ |
| 581474                         | k_Bacteria | p_Firmicutes | c_Bacilli | o_Lactobacillales | f_Lactobacillaceae | g_Lactobacillus | s_ |
| 484444                         | k_Bacteria | p_Firmicutes | c_Bacilli | o_Lactobacillales | f_Lactobacillaceae | g_Lactobacillus | s_ |
| 586093                         | k_Bacteria | p_Firmicutes | c_Bacilli | o_Lactobacillales | f_Lactobacillaceae | g_Lactobacillus | s_ |
| 509452                         | k_Bacteria | p_Firmicutes | c_Bacilli | o_Lactobacillales | f_Lactobacillaceae | g_Lactobacillus | s_ |
| 4300206                        | k_Bacteria | p_Firmicutes | c_Bacilli | o_Lactobacillales | f_Lactobacillaceae | g_Lactobacillus | s_ |
| 411486                         | k_Bacteria | p_Firmicutes | c_Bacilli | o_Lactobacillales | f_Lactobacillaceae | g_Lactobacillus | s_ |
| 537734                         | k_Bacteria | p_Firmicutes | c_Bacilli | o_Lactobacillales | f_Lactobacillaceae | g_Lactobacillus | s_ |
| 509149                         | k_Bacteria | p_Firmicutes | c_Bacilli | o_Lactobacillales | f_Lactobacillaceae | g_Lactobacillus | s_ |
| 545371                         | k_Bacteria | p_Firmicutes | c_Bacilli | o_Lactobacillales | f_Lactobacillaceae | g_Lactobacillus | s_ |
| New.CleanUp.ReferenceOTU102266 | k_Bacteria | p_Firmicutes | c_Bacilli | o_Lactobacillales | f_Lactobacillaceae | g_Lactobacillus | s_ |
| New.CleanUp.ReferenceOTU101569 | k_Bacteria | p_Firmicutes | c_Bacilli | o_Lactobacillales | f_Lactobacillaceae | g_Lactobacillus | s_ |
| 806179                         | k_Bacteria | p_Firmicutes | c_Bacilli | o_Lactobacillales | f_Lactobacillaceae | g_Lactobacillus | s_ |
| New.ReferenceOTU594            | k_Bacteria | p_Firmicutes | c_Bacilli | o_Lactobacillales | f_Lactobacillaceae | g_Lactobacillus | s_ |
| 807795                         | k_Bacteria | p_Firmicutes | c_Bacilli | o_Lactobacillales | f_Lactobacillaceae | g_Lactobacillus | s_ |
| 84709                          | k_Bacteria | p_Firmicutes | c_Bacilli | o_Lactobacillales | f_Lactobacillaceae | g_Lactobacillus | s_ |
| New.ReferenceOTU186            | k_Bacteria | p_Firmicutes | c_Bacilli | o_Lactobacillales | f_Lactobacillaceae | g_Lactobacillus | s_ |
| 958496                         | k_Bacteria | p_Firmicutes | c_Bacilli | o_Lactobacillales | f_Lactobacillaceae | g_Lactobacillus | s_ |
| 819507                         | k_Bacteria | p_Firmicutes | c_Bacilli | o_Lactobacillales | f_Lactobacillaceae | g_Lactobacillus | s_ |
| New.CleanUp.ReferenceOTU101529 | k_Bacteria | p_Firmicutes | c_Bacilli | o_Lactobacillales | f_Lactobacillaceae | g_Lactobacillus | s_ |
| 851794                         | k_Bacteria | p_Firmicutes | c_Bacilli | o_Lactobacillales | f_Lactobacillaceae | g_Lactobacillus | s_ |

[illegible]

[illegible]

[illegible]

[illegible]

[illegible]

[illegible]

[illegible]



[illegible]

[illegible]

|                                |             |                   |                        |                      |                     |                  |                   |
|--------------------------------|-------------|-------------------|------------------------|----------------------|---------------------|------------------|-------------------|
| New.CleanUp.ReferenceOTU9776   | k__Bacteria | p__Firmicutes     | c__Bacilli             | o__Lactobacillales   | f__Lactobacillaceae | g__Lactobacillus | s__               |
| New.CleanUp.ReferenceOTU956    | k__Bacteria | p__Firmicutes     | c__Bacilli             | o__Lactobacillales   | f__Lactobacillaceae | g__Lactobacillus | s__               |
| New.CleanUp.ReferenceOTU95113  | k__Bacteria | p__Firmicutes     | c__Bacilli             | o__Lactobacillales   | f__Lactobacillaceae | g__Lactobacillus | s__               |
| New.CleanUp.ReferenceOTU95607  | k__Bacteria | p__Firmicutes     | c__Bacilli             | o__Lactobacillales   | f__Lactobacillaceae | g__Lactobacillus | s__               |
| New.CleanUp.ReferenceOTU97602  | k__Bacteria | p__Firmicutes     | c__Bacilli             | o__Lactobacillales   | f__Lactobacillaceae | g__Lactobacillus | s__               |
| New.CleanUp.ReferenceOTU9908   | k__Bacteria | p__Firmicutes     | c__Bacilli             | o__Lactobacillales   | f__Lactobacillaceae | g__Lactobacillus | s__               |
| New.CleanUp.ReferenceOTU93209  | k__Bacteria | p__Firmicutes     | c__Bacilli             | o__Lactobacillales   | f__Lactobacillaceae | g__Lactobacillus | s__               |
| New.CleanUp.ReferenceOTU98110  | k__Bacteria | p__Firmicutes     | c__Bacilli             | o__Lactobacillales   | f__Lactobacillaceae | g__Lactobacillus | s__               |
| New.CleanUp.ReferenceOTU96610  | k__Bacteria | p__Firmicutes     | c__Bacilli             | o__Lactobacillales   | f__Lactobacillaceae | g__Lactobacillus | s__               |
| New.CleanUp.ReferenceOTU9910   | k__Bacteria | p__Firmicutes     | c__Bacilli             | o__Lactobacillales   | f__Lactobacillaceae | g__Lactobacillus | s__               |
| New.CleanUp.ReferenceOTU99030  | k__Bacteria | p__Firmicutes     | c__Bacilli             | o__Lactobacillales   | f__Lactobacillaceae | g__Lactobacillus | s__               |
| New.CleanUp.ReferenceOTU98126  | k__Bacteria | p__Firmicutes     | c__Bacilli             | o__Lactobacillales   | f__Lactobacillaceae | g__Lactobacillus | s__               |
| 342801                         | k__Bacteria | p__Firmicutes     | c__Bacilli             | o__Lactobacillales   | f__Lactobacillaceae | g__Lactobacillus | s__agilis         |
| New.CleanUp.ReferenceOTU78091  | k__Bacteria | p__Firmicutes     | c__Bacilli             | o__Lactobacillales   | f__Lactobacillaceae | g__Lactobacillus | s__manihotivorans |
| 338852                         | k__Bacteria | p__Firmicutes     | c__Bacilli             | o__Lactobacillales   | f__Lactobacillaceae | g__Lactobacillus | s__reuteri        |
| 332720                         | k__Bacteria | p__Firmicutes     | c__Bacilli             | o__Lactobacillales   | f__Lactobacillaceae | g__Lactobacillus | s__reuteri        |
| 725198                         | k__Bacteria | p__Firmicutes     | c__Bacilli             | o__Lactobacillales   | f__Lactobacillaceae | g__Lactobacillus | s__reuteri        |
| 355089                         | k__Bacteria | p__Firmicutes     | c__Bacilli             | o__Lactobacillales   | f__Lactobacillaceae | g__Lactobacillus | s__reuteri        |
| 584001                         | k__Bacteria | p__Firmicutes     | c__Bacilli             | o__Lactobacillales   | f__Lactobacillaceae | g__Lactobacillus | s__reuteri        |
| New.CleanUp.ReferenceOTU10055  | k__Bacteria | p__Firmicutes     | c__Bacilli             | o__Lactobacillales   | f__Lactobacillaceae | g__Lactobacillus | s__reuteri        |
| New.CleanUp.ReferenceOTU100325 | k__Bacteria | p__Firmicutes     | c__Bacilli             | o__Lactobacillales   | f__Lactobacillaceae | g__Lactobacillus | s__reuteri        |
| New.CleanUp.ReferenceOTU128631 | k__Bacteria | p__Firmicutes     | c__Bacilli             | o__Lactobacillales   | f__Lactobacillaceae | g__Lactobacillus | s__reuteri        |
| New.CleanUp.ReferenceOTU186316 | k__Bacteria | p__Firmicutes     | c__Bacilli             | o__Lactobacillales   | f__Lactobacillaceae | g__Lactobacillus | s__reuteri        |
| New.CleanUp.ReferenceOTU218772 | k__Bacteria | p__Firmicutes     | c__Bacilli             | o__Lactobacillales   | f__Lactobacillaceae | g__Lactobacillus | s__reuteri        |
| New.CleanUp.ReferenceOTU23224  | k__Bacteria | p__Firmicutes     | c__Bacilli             | o__Lactobacillales   | f__Lactobacillaceae | g__Lactobacillus | s__reuteri        |
| New.CleanUp.ReferenceOTU25689  | k__Bacteria | p__Firmicutes     | c__Bacilli             | o__Lactobacillales   | f__Lactobacillaceae | g__Lactobacillus | s__reuteri        |
| 178213                         | k__Bacteria | p__Firmicutes     | c__Bacilli             | o__Lactobacillales   | f__Lactobacillaceae | g__Lactobacillus | s__ruminis        |
| New.CleanUp.ReferenceOTU147519 | k__Bacteria | p__Firmicutes     | c__Bacilli             | o__Lactobacillales   | f__Lactobacillaceae | g__Lactobacillus | s__vaginalis      |
| 679245                         | k__Bacteria | p__Firmicutes     | c__Bacilli             | o__Lactobacillales   | f__Lactobacillaceae | g__Lactobacillus | s__zeae           |
| 518033                         | k__Bacteria | p__Firmicutes     | c__Bacilli             | o__Lactobacillales   | f__Lactobacillaceae | g__Lactobacillus | s__zeae           |
| 1113297                        | k__Bacteria | p__Proteobacteria | c__Gammaproteobacteria | o__Oceanospirillales | f__Halomonadaceae   | g__              | s__               |
| 156865                         | k__Bacteria | p__Proteobacteria | c__Gammaproteobacteria | o__Oceanospirillales | f__Halomonadaceae   | g__              | s__               |
| 4377242                        | k__Bacteria | p__Proteobacteria | c__Gammaproteobacteria | o__Oceanospirillales | f__Halomonadaceae   | g__              | s__               |
| 676045                         | k__Bacteria | p__Proteobacteria | c__Gammaproteobacteria | o__Oceanospirillales | f__Halomonadaceae   | g__              | s__               |
| 3846492                        | k__Bacteria | p__Proteobacteria | c__Gammaproteobacteria | o__Oceanospirillales | f__Halomonadaceae   | g__              | s__               |
| New.ReferenceOTU449            | k__Bacteria | p__Proteobacteria | c__Gammaproteobacteria | o__Oceanospirillales | f__Halomonadaceae   | g__              | s__               |
| New.CleanUp.ReferenceOTU100088 | k__Bacteria | p__Proteobacteria | c__Gammaproteobacteria | o__Oceanospirillales | f__Halomonadaceae   | g__              | s__               |

[illegible]

[illegible]

[illegible]

[illegible]

[illegible]



[illegible]

[illegible]

[illegible]

[illegible]

[illegible]

[illegible]

[illegible]

[illegible]



|         |             |               |               |                  |                   |     |     |
|---------|-------------|---------------|---------------|------------------|-------------------|-----|-----|
| 2949920 | k__Bacteria | p__Firmicutes | c__Clostridia | o__Clostridiales | f__Clostridiaceae | g__ | s__ |
| 252144  | k__Bacteria | p__Firmicutes | c__Clostridia | o__Clostridiales | f__Clostridiaceae | g__ | s__ |
| 194487  | k__Bacteria | p__Firmicutes | c__Clostridia | o__Clostridiales | f__Clostridiaceae | g__ | s__ |
| 2122726 | k__Bacteria | p__Firmicutes | c__Clostridia | o__Clostridiales | f__Clostridiaceae | g__ | s__ |
| 1625448 | k__Bacteria | p__Firmicutes | c__Clostridia | o__Clostridiales | f__Clostridiaceae | g__ | s__ |
| 211947  | k__Bacteria | p__Firmicutes | c__Clostridia | o__Clostridiales | f__Clostridiaceae | g__ | s__ |
| 300662  | k__Bacteria | p__Firmicutes | c__Clostridia | o__Clostridiales | f__Clostridiaceae | g__ | s__ |
| 225316  | k__Bacteria | p__Firmicutes | c__Clostridia | o__Clostridiales | f__Clostridiaceae | g__ | s__ |
| 276044  | k__Bacteria | p__Firmicutes | c__Clostridia | o__Clostridiales | f__Clostridiaceae | g__ | s__ |
| 1521602 | k__Bacteria | p__Firmicutes | c__Clostridia | o__Clostridiales | f__Clostridiaceae | g__ | s__ |
| 3358082 | k__Bacteria | p__Firmicutes | c__Clostridia | o__Clostridiales | f__Clostridiaceae | g__ | s__ |
| 177051  | k__Bacteria | p__Firmicutes | c__Clostridia | o__Clostridiales | f__Clostridiaceae | g__ | s__ |
| 238205  | k__Bacteria | p__Firmicutes | c__Clostridia | o__Clostridiales | f__Clostridiaceae | g__ | s__ |
| 342666  | k__Bacteria | p__Firmicutes | c__Clostridia | o__Clostridiales | f__Clostridiaceae | g__ | s__ |
| 290647  | k__Bacteria | p__Firmicutes | c__Clostridia | o__Clostridiales | f__Clostridiaceae | g__ | s__ |
| 1838560 | k__Bacteria | p__Firmicutes | c__Clostridia | o__Clostridiales | f__Clostridiaceae | g__ | s__ |
| 304779  | k__Bacteria | p__Firmicutes | c__Clostridia | o__Clostridiales | f__Clostridiaceae | g__ | s__ |
| 196346  | k__Bacteria | p__Firmicutes | c__Clostridia | o__Clostridiales | f__Clostridiaceae | g__ | s__ |
| 2272791 | k__Bacteria | p__Firmicutes | c__Clostridia | o__Clostridiales | f__Clostridiaceae | g__ | s__ |
| 290211  | k__Bacteria | p__Firmicutes | c__Clostridia | o__Clostridiales | f__Clostridiaceae | g__ | s__ |
| 1133519 | k__Bacteria | p__Firmicutes | c__Clostridia | o__Clostridiales | f__Clostridiaceae | g__ | s__ |
| 2869170 | k__Bacteria | p__Firmicutes | c__Clostridia | o__Clostridiales | f__Clostridiaceae | g__ | s__ |
| 296837  | k__Bacteria | p__Firmicutes | c__Clostridia | o__Clostridiales | f__Clostridiaceae | g__ | s__ |
| 179930  | k__Bacteria | p__Firmicutes | c__Clostridia | o__Clostridiales | f__Clostridiaceae | g__ | s__ |
| 338222  | k__Bacteria | p__Firmicutes | c__Clostridia | o__Clostridiales | f__Clostridiaceae | g__ | s__ |
| 290375  | k__Bacteria | p__Firmicutes | c__Clostridia | o__Clostridiales | f__Clostridiaceae | g__ | s__ |
| 290379  | k__Bacteria | p__Firmicutes | c__Clostridia | o__Clostridiales | f__Clostridiaceae | g__ | s__ |
| 248563  | k__Bacteria | p__Firmicutes | c__Clostridia | o__Clostridiales | f__Clostridiaceae | g__ | s__ |
| 1788776 | k__Bacteria | p__Firmicutes | c__Clostridia | o__Clostridiales | f__Clostridiaceae | g__ | s__ |
| 341134  | k__Bacteria | p__Firmicutes | c__Clostridia | o__Clostridiales | f__Clostridiaceae | g__ | s__ |
| 239771  | k__Bacteria | p__Firmicutes | c__Clostridia | o__Clostridiales | f__Clostridiaceae | g__ | s__ |
| 322367  | k__Bacteria | p__Firmicutes | c__Clostridia | o__Clostridiales | f__Clostridiaceae | g__ | s__ |
| 314204  | k__Bacteria | p__Firmicutes | c__Clostridia | o__Clostridiales | f__Clostridiaceae | g__ | s__ |
| 187956  | k__Bacteria | p__Firmicutes | c__Clostridia | o__Clostridiales | f__Clostridiaceae | g__ | s__ |
| 316014  | k__Bacteria | p__Firmicutes | c__Clostridia | o__Clostridiales | f__Clostridiaceae | g__ | s__ |
| 289622  | k__Bacteria | p__Firmicutes | c__Clostridia | o__Clostridiales | f__Clostridiaceae | g__ | s__ |
| 311207  | k__Bacteria | p__Firmicutes | c__Clostridia | o__Clostridiales | f__Clostridiaceae | g__ | s__ |

|                                |             |               |               |                  |                   |     |     |
|--------------------------------|-------------|---------------|---------------|------------------|-------------------|-----|-----|
| 236734                         | k__Bacteria | p__Firmicutes | c__Clostridia | o__Clostridiales | f__Clostridiaceae | g__ | s__ |
| 2225203                        | k__Bacteria | p__Firmicutes | c__Clostridia | o__Clostridiales | f__Clostridiaceae | g__ | s__ |
| 196848                         | k__Bacteria | p__Firmicutes | c__Clostridia | o__Clostridiales | f__Clostridiaceae | g__ | s__ |
| 1503693                        | k__Bacteria | p__Firmicutes | c__Clostridia | o__Clostridiales | f__Clostridiaceae | g__ | s__ |
| 189793                         | k__Bacteria | p__Firmicutes | c__Clostridia | o__Clostridiales | f__Clostridiaceae | g__ | s__ |
| 325326                         | k__Bacteria | p__Firmicutes | c__Clostridia | o__Clostridiales | f__Clostridiaceae | g__ | s__ |
| 256232                         | k__Bacteria | p__Firmicutes | c__Clostridia | o__Clostridiales | f__Clostridiaceae | g__ | s__ |
| 2201955                        | k__Bacteria | p__Firmicutes | c__Clostridia | o__Clostridiales | f__Clostridiaceae | g__ | s__ |
| 337379                         | k__Bacteria | p__Firmicutes | c__Clostridia | o__Clostridiales | f__Clostridiaceae | g__ | s__ |
| 1763286                        | k__Bacteria | p__Firmicutes | c__Clostridia | o__Clostridiales | f__Clostridiaceae | g__ | s__ |
| 325419                         | k__Bacteria | p__Firmicutes | c__Clostridia | o__Clostridiales | f__Clostridiaceae | g__ | s__ |
| 2167415                        | k__Bacteria | p__Firmicutes | c__Clostridia | o__Clostridiales | f__Clostridiaceae | g__ | s__ |
| 182861                         | k__Bacteria | p__Firmicutes | c__Clostridia | o__Clostridiales | f__Clostridiaceae | g__ | s__ |
| 182643                         | k__Bacteria | p__Firmicutes | c__Clostridia | o__Clostridiales | f__Clostridiaceae | g__ | s__ |
| 326569                         | k__Bacteria | p__Firmicutes | c__Clostridia | o__Clostridiales | f__Clostridiaceae | g__ | s__ |
| 307204                         | k__Bacteria | p__Firmicutes | c__Clostridia | o__Clostridiales | f__Clostridiaceae | g__ | s__ |
| 349144                         | k__Bacteria | p__Firmicutes | c__Clostridia | o__Clostridiales | f__Clostridiaceae | g__ | s__ |
| 555945                         | k__Bacteria | p__Firmicutes | c__Clostridia | o__Clostridiales | f__Clostridiaceae | g__ | s__ |
| 659634                         | k__Bacteria | p__Firmicutes | c__Clostridia | o__Clostridiales | f__Clostridiaceae | g__ | s__ |
| 36226                          | k__Bacteria | p__Firmicutes | c__Clostridia | o__Clostridiales | f__Clostridiaceae | g__ | s__ |
| 524842                         | k__Bacteria | p__Firmicutes | c__Clostridia | o__Clostridiales | f__Clostridiaceae | g__ | s__ |
| 541328                         | k__Bacteria | p__Firmicutes | c__Clostridia | o__Clostridiales | f__Clostridiaceae | g__ | s__ |
| 4374853                        | k__Bacteria | p__Firmicutes | c__Clostridia | o__Clostridiales | f__Clostridiaceae | g__ | s__ |
| 4355971                        | k__Bacteria | p__Firmicutes | c__Clostridia | o__Clostridiales | f__Clostridiaceae | g__ | s__ |
| 4289859                        | k__Bacteria | p__Firmicutes | c__Clostridia | o__Clostridiales | f__Clostridiaceae | g__ | s__ |
| 4468461                        | k__Bacteria | p__Firmicutes | c__Clostridia | o__Clostridiales | f__Clostridiaceae | g__ | s__ |
| 606927                         | k__Bacteria | p__Firmicutes | c__Clostridia | o__Clostridiales | f__Clostridiaceae | g__ | s__ |
| 4375710                        | k__Bacteria | p__Firmicutes | c__Clostridia | o__Clostridiales | f__Clostridiaceae | g__ | s__ |
| 426638                         | k__Bacteria | p__Firmicutes | c__Clostridia | o__Clostridiales | f__Clostridiaceae | g__ | s__ |
| 4393466                        | k__Bacteria | p__Firmicutes | c__Clostridia | o__Clostridiales | f__Clostridiaceae | g__ | s__ |
| 4381092                        | k__Bacteria | p__Firmicutes | c__Clostridia | o__Clostridiales | f__Clostridiaceae | g__ | s__ |
| 4396656                        | k__Bacteria | p__Firmicutes | c__Clostridia | o__Clostridiales | f__Clostridiaceae | g__ | s__ |
| 4438951                        | k__Bacteria | p__Firmicutes | c__Clostridia | o__Clostridiales | f__Clostridiaceae | g__ | s__ |
| 965696                         | k__Bacteria | p__Firmicutes | c__Clostridia | o__Clostridiales | f__Clostridiaceae | g__ | s__ |
| 843459                         | k__Bacteria | p__Firmicutes | c__Clostridia | o__Clostridiales | f__Clostridiaceae | g__ | s__ |
| New.CleanUp.ReferenceOTU101540 | k__Bacteria | p__Firmicutes | c__Clostridia | o__Clostridiales | f__Clostridiaceae | g__ | s__ |
| 780650                         | k__Bacteria | p__Firmicutes | c__Clostridia | o__Clostridiales | f__Clostridiaceae | g__ | s__ |

[illegible]

[illegible]

[illegible]

[illegible]

|                               |             |               |               |                  |                    |     |     |
|-------------------------------|-------------|---------------|---------------|------------------|--------------------|-----|-----|
| New.CleanUp.ReferenceOTU92378 | k__Bacteria | p__Firmicutes | c__Clostridia | o__Clostridiales | f__Clostridiaceae  | g__ | s__ |
| New.CleanUp.ReferenceOTU98929 | k__Bacteria | p__Firmicutes | c__Clostridia | o__Clostridiales | f__Clostridiaceae  | g__ | s__ |
| New.CleanUp.ReferenceOTU99473 | k__Bacteria | p__Firmicutes | c__Clostridia | o__Clostridiales | f__Clostridiaceae  | g__ | s__ |
| New.CleanUp.ReferenceOTU93201 | k__Bacteria | p__Firmicutes | c__Clostridia | o__Clostridiales | f__Clostridiaceae  | g__ | s__ |
| New.CleanUp.ReferenceOTU9339  | k__Bacteria | p__Firmicutes | c__Clostridia | o__Clostridiales | f__Clostridiaceae  | g__ | s__ |
| 182674                        | k__Bacteria | p__Firmicutes | c__Clostridia | o__Clostridiales | f__Ruminococcaceae | g__ | s__ |
| 1062061                       | k__Bacteria | p__Firmicutes | c__Clostridia | o__Clostridiales | f__Ruminococcaceae | g__ | s__ |
| 329729                        | k__Bacteria | p__Firmicutes | c__Clostridia | o__Clostridiales | f__Ruminococcaceae | g__ | s__ |
| 194320                        | k__Bacteria | p__Firmicutes | c__Clostridia | o__Clostridiales | f__Ruminococcaceae | g__ | s__ |
| 296394                        | k__Bacteria | p__Firmicutes | c__Clostridia | o__Clostridiales | f__Ruminococcaceae | g__ | s__ |
| 194648                        | k__Bacteria | p__Firmicutes | c__Clostridia | o__Clostridiales | f__Ruminococcaceae | g__ | s__ |
| 188348                        | k__Bacteria | p__Firmicutes | c__Clostridia | o__Clostridiales | f__Ruminococcaceae | g__ | s__ |
| 322004                        | k__Bacteria | p__Firmicutes | c__Clostridia | o__Clostridiales | f__Ruminococcaceae | g__ | s__ |
| 309720                        | k__Bacteria | p__Firmicutes | c__Clostridia | o__Clostridiales | f__Ruminococcaceae | g__ | s__ |
| 279534                        | k__Bacteria | p__Firmicutes | c__Clostridia | o__Clostridiales | f__Ruminococcaceae | g__ | s__ |
| 306633                        | k__Bacteria | p__Firmicutes | c__Clostridia | o__Clostridiales | f__Ruminococcaceae | g__ | s__ |
| 191216                        | k__Bacteria | p__Firmicutes | c__Clostridia | o__Clostridiales | f__Ruminococcaceae | g__ | s__ |
| 198151                        | k__Bacteria | p__Firmicutes | c__Clostridia | o__Clostridiales | f__Ruminococcaceae | g__ | s__ |
| 341263                        | k__Bacteria | p__Firmicutes | c__Clostridia | o__Clostridiales | f__Ruminococcaceae | g__ | s__ |
| 194497                        | k__Bacteria | p__Firmicutes | c__Clostridia | o__Clostridiales | f__Ruminococcaceae | g__ | s__ |
| 318190                        | k__Bacteria | p__Firmicutes | c__Clostridia | o__Clostridiales | f__Ruminococcaceae | g__ | s__ |
| 194875                        | k__Bacteria | p__Firmicutes | c__Clostridia | o__Clostridiales | f__Ruminococcaceae | g__ | s__ |
| 177061                        | k__Bacteria | p__Firmicutes | c__Clostridia | o__Clostridiales | f__Ruminococcaceae | g__ | s__ |
| 345118                        | k__Bacteria | p__Firmicutes | c__Clostridia | o__Clostridiales | f__Ruminococcaceae | g__ | s__ |
| 324244                        | k__Bacteria | p__Firmicutes | c__Clostridia | o__Clostridiales | f__Ruminococcaceae | g__ | s__ |
| 293621                        | k__Bacteria | p__Firmicutes | c__Clostridia | o__Clostridiales | f__Ruminococcaceae | g__ | s__ |
| 176994                        | k__Bacteria | p__Firmicutes | c__Clostridia | o__Clostridiales | f__Ruminococcaceae | g__ | s__ |
| 288198                        | k__Bacteria | p__Firmicutes | c__Clostridia | o__Clostridiales | f__Ruminococcaceae | g__ | s__ |
| 347735                        | k__Bacteria | p__Firmicutes | c__Clostridia | o__Clostridiales | f__Ruminococcaceae | g__ | s__ |
| 184287                        | k__Bacteria | p__Firmicutes | c__Clostridia | o__Clostridiales | f__Ruminococcaceae | g__ | s__ |
| 336890                        | k__Bacteria | p__Firmicutes | c__Clostridia | o__Clostridiales | f__Ruminococcaceae | g__ | s__ |
| 332831                        | k__Bacteria | p__Firmicutes | c__Clostridia | o__Clostridiales | f__Ruminococcaceae | g__ | s__ |
| 19611                         | k__Bacteria | p__Firmicutes | c__Clostridia | o__Clostridiales | f__Ruminococcaceae | g__ | s__ |
| 194326                        | k__Bacteria | p__Firmicutes | c__Clostridia | o__Clostridiales | f__Ruminococcaceae | g__ | s__ |
| 333363                        | k__Bacteria | p__Firmicutes | c__Clostridia | o__Clostridiales | f__Ruminococcaceae | g__ | s__ |
| 175298                        | k__Bacteria | p__Firmicutes | c__Clostridia | o__Clostridiales | f__Ruminococcaceae | g__ | s__ |
| 317065                        | k__Bacteria | p__Firmicutes | c__Clostridia | o__Clostridiales | f__Ruminococcaceae | g__ | s__ |

|         |             |               |               |                  |                    |     |     |
|---------|-------------|---------------|---------------|------------------|--------------------|-----|-----|
| 192323  | k__Bacteria | p__Firmicutes | c__Clostridia | o__Clostridiales | f__Ruminococcaceae | g__ | s__ |
| 175962  | k__Bacteria | p__Firmicutes | c__Clostridia | o__Clostridiales | f__Ruminococcaceae | g__ | s__ |
| 166689  | k__Bacteria | p__Firmicutes | c__Clostridia | o__Clostridiales | f__Ruminococcaceae | g__ | s__ |
| 312628  | k__Bacteria | p__Firmicutes | c__Clostridia | o__Clostridiales | f__Ruminococcaceae | g__ | s__ |
| 191792  | k__Bacteria | p__Firmicutes | c__Clostridia | o__Clostridiales | f__Ruminococcaceae | g__ | s__ |
| 346370  | k__Bacteria | p__Firmicutes | c__Clostridia | o__Clostridiales | f__Ruminococcaceae | g__ | s__ |
| 193950  | k__Bacteria | p__Firmicutes | c__Clostridia | o__Clostridiales | f__Ruminococcaceae | g__ | s__ |
| 346720  | k__Bacteria | p__Firmicutes | c__Clostridia | o__Clostridiales | f__Ruminococcaceae | g__ | s__ |
| 212619  | k__Bacteria | p__Firmicutes | c__Clostridia | o__Clostridiales | f__Ruminococcaceae | g__ | s__ |
| 1501336 | k__Bacteria | p__Firmicutes | c__Clostridia | o__Clostridiales | f__Ruminococcaceae | g__ | s__ |
| 321960  | k__Bacteria | p__Firmicutes | c__Clostridia | o__Clostridiales | f__Ruminococcaceae | g__ | s__ |
| 341024  | k__Bacteria | p__Firmicutes | c__Clostridia | o__Clostridiales | f__Ruminococcaceae | g__ | s__ |
| 319262  | k__Bacteria | p__Firmicutes | c__Clostridia | o__Clostridiales | f__Ruminococcaceae | g__ | s__ |
| 337167  | k__Bacteria | p__Firmicutes | c__Clostridia | o__Clostridiales | f__Ruminococcaceae | g__ | s__ |
| 335816  | k__Bacteria | p__Firmicutes | c__Clostridia | o__Clostridiales | f__Ruminococcaceae | g__ | s__ |
| 2835813 | k__Bacteria | p__Firmicutes | c__Clostridia | o__Clostridiales | f__Ruminococcaceae | g__ | s__ |
| 346598  | k__Bacteria | p__Firmicutes | c__Clostridia | o__Clostridiales | f__Ruminococcaceae | g__ | s__ |
| 1599042 | k__Bacteria | p__Firmicutes | c__Clostridia | o__Clostridiales | f__Ruminococcaceae | g__ | s__ |
| 190649  | k__Bacteria | p__Firmicutes | c__Clostridia | o__Clostridiales | f__Ruminococcaceae | g__ | s__ |
| 302144  | k__Bacteria | p__Firmicutes | c__Clostridia | o__Clostridiales | f__Ruminococcaceae | g__ | s__ |
| 291202  | k__Bacteria | p__Firmicutes | c__Clostridia | o__Clostridiales | f__Ruminococcaceae | g__ | s__ |
| 291206  | k__Bacteria | p__Firmicutes | c__Clostridia | o__Clostridiales | f__Ruminococcaceae | g__ | s__ |
| 15976   | k__Bacteria | p__Firmicutes | c__Clostridia | o__Clostridiales | f__Ruminococcaceae | g__ | s__ |
| 347085  | k__Bacteria | p__Firmicutes | c__Clostridia | o__Clostridiales | f__Ruminococcaceae | g__ | s__ |
| 193679  | k__Bacteria | p__Firmicutes | c__Clostridia | o__Clostridiales | f__Ruminococcaceae | g__ | s__ |
| 192818  | k__Bacteria | p__Firmicutes | c__Clostridia | o__Clostridiales | f__Ruminococcaceae | g__ | s__ |
| 344523  | k__Bacteria | p__Firmicutes | c__Clostridia | o__Clostridiales | f__Ruminococcaceae | g__ | s__ |
| 302809  | k__Bacteria | p__Firmicutes | c__Clostridia | o__Clostridiales | f__Ruminococcaceae | g__ | s__ |
| 196017  | k__Bacteria | p__Firmicutes | c__Clostridia | o__Clostridiales | f__Ruminococcaceae | g__ | s__ |
| 301280  | k__Bacteria | p__Firmicutes | c__Clostridia | o__Clostridiales | f__Ruminococcaceae | g__ | s__ |
| 309745  | k__Bacteria | p__Firmicutes | c__Clostridia | o__Clostridiales | f__Ruminococcaceae | g__ | s__ |
| 335906  | k__Bacteria | p__Firmicutes | c__Clostridia | o__Clostridiales | f__Ruminococcaceae | g__ | s__ |
| 339914  | k__Bacteria | p__Firmicutes | c__Clostridia | o__Clostridiales | f__Ruminococcaceae | g__ | s__ |
| 235212  | k__Bacteria | p__Firmicutes | c__Clostridia | o__Clostridiales | f__Ruminococcaceae | g__ | s__ |
| 347791  | k__Bacteria | p__Firmicutes | c__Clostridia | o__Clostridiales | f__Ruminococcaceae | g__ | s__ |
| 342543  | k__Bacteria | p__Firmicutes | c__Clostridia | o__Clostridiales | f__Ruminococcaceae | g__ | s__ |
| 291266  | k__Bacteria | p__Firmicutes | c__Clostridia | o__Clostridiales | f__Ruminococcaceae | g__ | s__ |



|        |            |              |              |                 |                   |     |     |
|--------|------------|--------------|--------------|-----------------|-------------------|-----|-----|
| 215269 | k_Bacteria | p_Firmicutes | c_Clostridia | o_Clostridiales | f_Ruminococcaceae | g__ | s__ |
| 176582 | k_Bacteria | p_Firmicutes | c_Clostridia | o_Clostridiales | f_Ruminococcaceae | g__ | s__ |
| 342575 | k_Bacteria | p_Firmicutes | c_Clostridia | o_Clostridiales | f_Ruminococcaceae | g__ | s__ |
| 257774 | k_Bacteria | p_Firmicutes | c_Clostridia | o_Clostridiales | f_Ruminococcaceae | g__ | s__ |
| 328659 | k_Bacteria | p_Firmicutes | c_Clostridia | o_Clostridiales | f_Ruminococcaceae | g__ | s__ |
| 210647 | k_Bacteria | p_Firmicutes | c_Clostridia | o_Clostridiales | f_Ruminococcaceae | g__ | s__ |
| 186143 | k_Bacteria | p_Firmicutes | c_Clostridia | o_Clostridiales | f_Ruminococcaceae | g__ | s__ |
| 335670 | k_Bacteria | p_Firmicutes | c_Clostridia | o_Clostridiales | f_Ruminococcaceae | g__ | s__ |
| 253471 | k_Bacteria | p_Firmicutes | c_Clostridia | o_Clostridiales | f_Ruminococcaceae | g__ | s__ |
| 182797 | k_Bacteria | p_Firmicutes | c_Clostridia | o_Clostridiales | f_Ruminococcaceae | g__ | s__ |
| 184897 | k_Bacteria | p_Firmicutes | c_Clostridia | o_Clostridiales | f_Ruminococcaceae | g__ | s__ |
| 186020 | k_Bacteria | p_Firmicutes | c_Clostridia | o_Clostridiales | f_Ruminococcaceae | g__ | s__ |
| 344329 | k_Bacteria | p_Firmicutes | c_Clostridia | o_Clostridiales | f_Ruminococcaceae | g__ | s__ |
| 27355  | k_Bacteria | p_Firmicutes | c_Clostridia | o_Clostridiales | f_Ruminococcaceae | g__ | s__ |
| 196982 | k_Bacteria | p_Firmicutes | c_Clostridia | o_Clostridiales | f_Ruminococcaceae | g__ | s__ |
| 294169 | k_Bacteria | p_Firmicutes | c_Clostridia | o_Clostridiales | f_Ruminococcaceae | g__ | s__ |
| 313452 | k_Bacteria | p_Firmicutes | c_Clostridia | o_Clostridiales | f_Ruminococcaceae | g__ | s__ |
| 322258 | k_Bacteria | p_Firmicutes | c_Clostridia | o_Clostridiales | f_Ruminococcaceae | g__ | s__ |
| 171547 | k_Bacteria | p_Firmicutes | c_Clostridia | o_Clostridiales | f_Ruminococcaceae | g__ | s__ |
| 185203 | k_Bacteria | p_Firmicutes | c_Clostridia | o_Clostridiales | f_Ruminococcaceae | g__ | s__ |
| 192370 | k_Bacteria | p_Firmicutes | c_Clostridia | o_Clostridiales | f_Ruminococcaceae | g__ | s__ |
| 304531 | k_Bacteria | p_Firmicutes | c_Clostridia | o_Clostridiales | f_Ruminococcaceae | g__ | s__ |
| 277215 | k_Bacteria | p_Firmicutes | c_Clostridia | o_Clostridiales | f_Ruminococcaceae | g__ | s__ |
| 341724 | k_Bacteria | p_Firmicutes | c_Clostridia | o_Clostridiales | f_Ruminococcaceae | g__ | s__ |
| 208739 | k_Bacteria | p_Firmicutes | c_Clostridia | o_Clostridiales | f_Ruminococcaceae | g__ | s__ |
| 182920 | k_Bacteria | p_Firmicutes | c_Clostridia | o_Clostridiales | f_Ruminococcaceae | g__ | s__ |
| 262563 | k_Bacteria | p_Firmicutes | c_Clostridia | o_Clostridiales | f_Ruminococcaceae | g__ | s__ |
| 267718 | k_Bacteria | p_Firmicutes | c_Clostridia | o_Clostridiales | f_Ruminococcaceae | g__ | s__ |
| 355450 | k_Bacteria | p_Firmicutes | c_Clostridia | o_Clostridiales | f_Ruminococcaceae | g__ | s__ |
| 641783 | k_Bacteria | p_Firmicutes | c_Clostridia | o_Clostridiales | f_Ruminococcaceae | g__ | s__ |
| 559659 | k_Bacteria | p_Firmicutes | c_Clostridia | o_Clostridiales | f_Ruminococcaceae | g__ | s__ |
| 353982 | k_Bacteria | p_Firmicutes | c_Clostridia | o_Clostridiales | f_Ruminococcaceae | g__ | s__ |
| 579541 | k_Bacteria | p_Firmicutes | c_Clostridia | o_Clostridiales | f_Ruminococcaceae | g__ | s__ |
| 560535 | k_Bacteria | p_Firmicutes | c_Clostridia | o_Clostridiales | f_Ruminococcaceae | g__ | s__ |
| 566155 | k_Bacteria | p_Firmicutes | c_Clostridia | o_Clostridiales | f_Ruminococcaceae | g__ | s__ |
| 392918 | k_Bacteria | p_Firmicutes | c_Clostridia | o_Clostridiales | f_Ruminococcaceae | g__ | s__ |
| 564941 | k_Bacteria | p_Firmicutes | c_Clostridia | o_Clostridiales | f_Ruminococcaceae | g__ | s__ |

|         |             |               |               |                  |                    |     |     |
|---------|-------------|---------------|---------------|------------------|--------------------|-----|-----|
| 362078  | k__Bacteria | p__Firmicutes | c__Clostridia | o__Clostridiales | f__Ruminococcaceae | g__ | s__ |
| 356245  | k__Bacteria | p__Firmicutes | c__Clostridia | o__Clostridiales | f__Ruminococcaceae | g__ | s__ |
| 355685  | k__Bacteria | p__Firmicutes | c__Clostridia | o__Clostridiales | f__Ruminococcaceae | g__ | s__ |
| 359175  | k__Bacteria | p__Firmicutes | c__Clostridia | o__Clostridiales | f__Ruminococcaceae | g__ | s__ |
| 509723  | k__Bacteria | p__Firmicutes | c__Clostridia | o__Clostridiales | f__Ruminococcaceae | g__ | s__ |
| 583572  | k__Bacteria | p__Firmicutes | c__Clostridia | o__Clostridiales | f__Ruminococcaceae | g__ | s__ |
| 4288931 | k__Bacteria | p__Firmicutes | c__Clostridia | o__Clostridiales | f__Ruminococcaceae | g__ | s__ |
| 357028  | k__Bacteria | p__Firmicutes | c__Clostridia | o__Clostridiales | f__Ruminococcaceae | g__ | s__ |
| 361966  | k__Bacteria | p__Firmicutes | c__Clostridia | o__Clostridiales | f__Ruminococcaceae | g__ | s__ |
| 523244  | k__Bacteria | p__Firmicutes | c__Clostridia | o__Clostridiales | f__Ruminococcaceae | g__ | s__ |
| 375106  | k__Bacteria | p__Firmicutes | c__Clostridia | o__Clostridiales | f__Ruminococcaceae | g__ | s__ |
| 519246  | k__Bacteria | p__Firmicutes | c__Clostridia | o__Clostridiales | f__Ruminococcaceae | g__ | s__ |
| 592139  | k__Bacteria | p__Firmicutes | c__Clostridia | o__Clostridiales | f__Ruminococcaceae | g__ | s__ |
| 581201  | k__Bacteria | p__Firmicutes | c__Clostridia | o__Clostridiales | f__Ruminococcaceae | g__ | s__ |
| 515953  | k__Bacteria | p__Firmicutes | c__Clostridia | o__Clostridiales | f__Ruminococcaceae | g__ | s__ |
| 350681  | k__Bacteria | p__Firmicutes | c__Clostridia | o__Clostridiales | f__Ruminococcaceae | g__ | s__ |
| 370086  | k__Bacteria | p__Firmicutes | c__Clostridia | o__Clostridiales | f__Ruminococcaceae | g__ | s__ |
| 355510  | k__Bacteria | p__Firmicutes | c__Clostridia | o__Clostridiales | f__Ruminococcaceae | g__ | s__ |
| 359984  | k__Bacteria | p__Firmicutes | c__Clostridia | o__Clostridiales | f__Ruminococcaceae | g__ | s__ |
| 579462  | k__Bacteria | p__Firmicutes | c__Clostridia | o__Clostridiales | f__Ruminococcaceae | g__ | s__ |
| 558420  | k__Bacteria | p__Firmicutes | c__Clostridia | o__Clostridiales | f__Ruminococcaceae | g__ | s__ |
| 509788  | k__Bacteria | p__Firmicutes | c__Clostridia | o__Clostridiales | f__Ruminococcaceae | g__ | s__ |
| 4315789 | k__Bacteria | p__Firmicutes | c__Clostridia | o__Clostridiales | f__Ruminococcaceae | g__ | s__ |
| 553080  | k__Bacteria | p__Firmicutes | c__Clostridia | o__Clostridiales | f__Ruminococcaceae | g__ | s__ |
| 4056429 | k__Bacteria | p__Firmicutes | c__Clostridia | o__Clostridiales | f__Ruminococcaceae | g__ | s__ |
| 367213  | k__Bacteria | p__Firmicutes | c__Clostridia | o__Clostridiales | f__Ruminococcaceae | g__ | s__ |
| 720093  | k__Bacteria | p__Firmicutes | c__Clostridia | o__Clostridiales | f__Ruminococcaceae | g__ | s__ |
| 561607  | k__Bacteria | p__Firmicutes | c__Clostridia | o__Clostridiales | f__Ruminococcaceae | g__ | s__ |
| 520840  | k__Bacteria | p__Firmicutes | c__Clostridia | o__Clostridiales | f__Ruminococcaceae | g__ | s__ |
| 46910   | k__Bacteria | p__Firmicutes | c__Clostridia | o__Clostridiales | f__Ruminococcaceae | g__ | s__ |
| 369109  | k__Bacteria | p__Firmicutes | c__Clostridia | o__Clostridiales | f__Ruminococcaceae | g__ | s__ |
| 366584  | k__Bacteria | p__Firmicutes | c__Clostridia | o__Clostridiales | f__Ruminococcaceae | g__ | s__ |
| 365965  | k__Bacteria | p__Firmicutes | c__Clostridia | o__Clostridiales | f__Ruminococcaceae | g__ | s__ |
| 551902  | k__Bacteria | p__Firmicutes | c__Clostridia | o__Clostridiales | f__Ruminococcaceae | g__ | s__ |
| 363358  | k__Bacteria | p__Firmicutes | c__Clostridia | o__Clostridiales | f__Ruminococcaceae | g__ | s__ |
| 4439489 | k__Bacteria | p__Firmicutes | c__Clostridia | o__Clostridiales | f__Ruminococcaceae | g__ | s__ |
| 355120  | k__Bacteria | p__Firmicutes | c__Clostridia | o__Clostridiales | f__Ruminococcaceae | g__ | s__ |

|                                |            |              |              |                 |                   |     |     |
|--------------------------------|------------|--------------|--------------|-----------------|-------------------|-----|-----|
| 350036                         | k_Bacteria | p_Firmicutes | c_Clostridia | o_Clostridiales | f_Ruminococcaceae | g__ | s__ |
| 358639                         | k_Bacteria | p_Firmicutes | c_Clostridia | o_Clostridiales | f_Ruminococcaceae | g__ | s__ |
| 519882                         | k_Bacteria | p_Firmicutes | c_Clostridia | o_Clostridiales | f_Ruminococcaceae | g__ | s__ |
| 558397                         | k_Bacteria | p_Firmicutes | c_Clostridia | o_Clostridiales | f_Ruminococcaceae | g__ | s__ |
| 584951                         | k_Bacteria | p_Firmicutes | c_Clostridia | o_Clostridiales | f_Ruminococcaceae | g__ | s__ |
| 355837                         | k_Bacteria | p_Firmicutes | c_Clostridia | o_Clostridiales | f_Ruminococcaceae | g__ | s__ |
| 712142                         | k_Bacteria | p_Firmicutes | c_Clostridia | o_Clostridiales | f_Ruminococcaceae | g__ | s__ |
| 540055                         | k_Bacteria | p_Firmicutes | c_Clostridia | o_Clostridiales | f_Ruminococcaceae | g__ | s__ |
| 361811                         | k_Bacteria | p_Firmicutes | c_Clostridia | o_Clostridiales | f_Ruminococcaceae | g__ | s__ |
| 580121                         | k_Bacteria | p_Firmicutes | c_Clostridia | o_Clostridiales | f_Ruminococcaceae | g__ | s__ |
| 4315186                        | k_Bacteria | p_Firmicutes | c_Clostridia | o_Clostridiales | f_Ruminococcaceae | g__ | s__ |
| 367946                         | k_Bacteria | p_Firmicutes | c_Clostridia | o_Clostridiales | f_Ruminococcaceae | g__ | s__ |
| 766113                         | k_Bacteria | p_Firmicutes | c_Clostridia | o_Clostridiales | f_Ruminococcaceae | g__ | s__ |
| 870421                         | k_Bacteria | p_Firmicutes | c_Clostridia | o_Clostridiales | f_Ruminococcaceae | g__ | s__ |
| 817995                         | k_Bacteria | p_Firmicutes | c_Clostridia | o_Clostridiales | f_Ruminococcaceae | g__ | s__ |
| New.ReferenceOTU416            | k_Bacteria | p_Firmicutes | c_Clostridia | o_Clostridiales | f_Ruminococcaceae | g__ | s__ |
| 958505                         | k_Bacteria | p_Firmicutes | c_Clostridia | o_Clostridiales | f_Ruminococcaceae | g__ | s__ |
| New.CleanUp.ReferenceOTU101478 | k_Bacteria | p_Firmicutes | c_Clostridia | o_Clostridiales | f_Ruminococcaceae | g__ | s__ |
| 844006                         | k_Bacteria | p_Firmicutes | c_Clostridia | o_Clostridiales | f_Ruminococcaceae | g__ | s__ |
| 819181                         | k_Bacteria | p_Firmicutes | c_Clostridia | o_Clostridiales | f_Ruminococcaceae | g__ | s__ |
| New.CleanUp.ReferenceOTU100929 | k_Bacteria | p_Firmicutes | c_Clostridia | o_Clostridiales | f_Ruminococcaceae | g__ | s__ |
| 887025                         | k_Bacteria | p_Firmicutes | c_Clostridia | o_Clostridiales | f_Ruminococcaceae | g__ | s__ |
| New.CleanUp.ReferenceOTU102295 | k_Bacteria | p_Firmicutes | c_Clostridia | o_Clostridiales | f_Ruminococcaceae | g__ | s__ |
| New.CleanUp.ReferenceOTU104256 | k_Bacteria | p_Firmicutes | c_Clostridia | o_Clostridiales | f_Ruminococcaceae | g__ | s__ |
| New.CleanUp.ReferenceOTU10774  | k_Bacteria | p_Firmicutes | c_Clostridia | o_Clostridiales | f_Ruminococcaceae | g__ | s__ |
| New.CleanUp.ReferenceOTU114451 | k_Bacteria | p_Firmicutes | c_Clostridia | o_Clostridiales | f_Ruminococcaceae | g__ | s__ |
| New.CleanUp.ReferenceOTU115910 | k_Bacteria | p_Firmicutes | c_Clostridia | o_Clostridiales | f_Ruminococcaceae | g__ | s__ |
| New.CleanUp.ReferenceOTU11667  | k_Bacteria | p_Firmicutes | c_Clostridia | o_Clostridiales | f_Ruminococcaceae | g__ | s__ |
| New.CleanUp.ReferenceOTU113150 | k_Bacteria | p_Firmicutes | c_Clostridia | o_Clostridiales | f_Ruminococcaceae | g__ | s__ |
| New.CleanUp.ReferenceOTU112956 | k_Bacteria | p_Firmicutes | c_Clostridia | o_Clostridiales | f_Ruminococcaceae | g__ | s__ |
| New.CleanUp.ReferenceOTU112097 | k_Bacteria | p_Firmicutes | c_Clostridia | o_Clostridiales | f_Ruminococcaceae | g__ | s__ |
| New.CleanUp.ReferenceOTU11359  | k_Bacteria | p_Firmicutes | c_Clostridia | o_Clostridiales | f_Ruminococcaceae | g__ | s__ |
| New.CleanUp.ReferenceOTU123816 | k_Bacteria | p_Firmicutes | c_Clostridia | o_Clostridiales | f_Ruminococcaceae | g__ | s__ |
| New.CleanUp.ReferenceOTU120378 | k_Bacteria | p_Firmicutes | c_Clostridia | o_Clostridiales | f_Ruminococcaceae | g__ | s__ |
| New.CleanUp.ReferenceOTU118291 | k_Bacteria | p_Firmicutes | c_Clostridia | o_Clostridiales | f_Ruminococcaceae | g__ | s__ |
| New.CleanUp.ReferenceOTU120778 | k_Bacteria | p_Firmicutes | c_Clostridia | o_Clostridiales | f_Ruminococcaceae | g__ | s__ |
| New.CleanUp.ReferenceOTU117825 | k_Bacteria | p_Firmicutes | c_Clostridia | o_Clostridiales | f_Ruminococcaceae | g__ | s__ |

[illegible]

[illegible]

[illegible]

[illegible]

|         |             |               |               |                  |     |     |     |
|---------|-------------|---------------|---------------|------------------|-----|-----|-----|
| 108482  | k__Bacteria | p__Firmicutes | c__Clostridia | o__Clostridiales | f__ | g__ | s__ |
| 273806  | k__Bacteria | p__Firmicutes | c__Clostridia | o__Clostridiales | f__ | g__ | s__ |
| 295861  | k__Bacteria | p__Firmicutes | c__Clostridia | o__Clostridiales | f__ | g__ | s__ |
| 229459  | k__Bacteria | p__Firmicutes | c__Clostridia | o__Clostridiales | f__ | g__ | s__ |
| 325213  | k__Bacteria | p__Firmicutes | c__Clostridia | o__Clostridiales | f__ | g__ | s__ |
| 1571092 | k__Bacteria | p__Firmicutes | c__Clostridia | o__Clostridiales | f__ | g__ | s__ |
| 262247  | k__Bacteria | p__Firmicutes | c__Clostridia | o__Clostridiales | f__ | g__ | s__ |
| 183169  | k__Bacteria | p__Firmicutes | c__Clostridia | o__Clostridiales | f__ | g__ | s__ |
| 343811  | k__Bacteria | p__Firmicutes | c__Clostridia | o__Clostridiales | f__ | g__ | s__ |
| 1040889 | k__Bacteria | p__Firmicutes | c__Clostridia | o__Clostridiales | f__ | g__ | s__ |
| 318470  | k__Bacteria | p__Firmicutes | c__Clostridia | o__Clostridiales | f__ | g__ | s__ |
| 329712  | k__Bacteria | p__Firmicutes | c__Clostridia | o__Clostridiales | f__ | g__ | s__ |
| 210867  | k__Bacteria | p__Firmicutes | c__Clostridia | o__Clostridiales | f__ | g__ | s__ |
| 210262  | k__Bacteria | p__Firmicutes | c__Clostridia | o__Clostridiales | f__ | g__ | s__ |
| 312490  | k__Bacteria | p__Firmicutes | c__Clostridia | o__Clostridiales | f__ | g__ | s__ |
| 299306  | k__Bacteria | p__Firmicutes | c__Clostridia | o__Clostridiales | f__ | g__ | s__ |
| 249776  | k__Bacteria | p__Firmicutes | c__Clostridia | o__Clostridiales | f__ | g__ | s__ |
| 337403  | k__Bacteria | p__Firmicutes | c__Clostridia | o__Clostridiales | f__ | g__ | s__ |
| 193075  | k__Bacteria | p__Firmicutes | c__Clostridia | o__Clostridiales | f__ | g__ | s__ |
| 276597  | k__Bacteria | p__Firmicutes | c__Clostridia | o__Clostridiales | f__ | g__ | s__ |
| 2368865 | k__Bacteria | p__Firmicutes | c__Clostridia | o__Clostridiales | f__ | g__ | s__ |
| 333426  | k__Bacteria | p__Firmicutes | c__Clostridia | o__Clostridiales | f__ | g__ | s__ |
| 198380  | k__Bacteria | p__Firmicutes | c__Clostridia | o__Clostridiales | f__ | g__ | s__ |
| 195934  | k__Bacteria | p__Firmicutes | c__Clostridia | o__Clostridiales | f__ | g__ | s__ |
| 342786  | k__Bacteria | p__Firmicutes | c__Clostridia | o__Clostridiales | f__ | g__ | s__ |
| 261574  | k__Bacteria | p__Firmicutes | c__Clostridia | o__Clostridiales | f__ | g__ | s__ |
| 271811  | k__Bacteria | p__Firmicutes | c__Clostridia | o__Clostridiales | f__ | g__ | s__ |
| 185961  | k__Bacteria | p__Firmicutes | c__Clostridia | o__Clostridiales | f__ | g__ | s__ |
| 1106861 | k__Bacteria | p__Firmicutes | c__Clostridia | o__Clostridiales | f__ | g__ | s__ |
| 230618  | k__Bacteria | p__Firmicutes | c__Clostridia | o__Clostridiales | f__ | g__ | s__ |
| 322839  | k__Bacteria | p__Firmicutes | c__Clostridia | o__Clostridiales | f__ | g__ | s__ |
| 290338  | k__Bacteria | p__Firmicutes | c__Clostridia | o__Clostridiales | f__ | g__ | s__ |
| 114912  | k__Bacteria | p__Firmicutes | c__Clostridia | o__Clostridiales | f__ | g__ | s__ |
| 214116  | k__Bacteria | p__Firmicutes | c__Clostridia | o__Clostridiales | f__ | g__ | s__ |
| 339133  | k__Bacteria | p__Firmicutes | c__Clostridia | o__Clostridiales | f__ | g__ | s__ |
| 2122024 | k__Bacteria | p__Firmicutes | c__Clostridia | o__Clostridiales | f__ | g__ | s__ |
| 174279  | k__Bacteria | p__Firmicutes | c__Clostridia | o__Clostridiales | f__ | g__ | s__ |



|         |             |               |               |                  |     |     |     |
|---------|-------------|---------------|---------------|------------------|-----|-----|-----|
| 186775  | k__Bacteria | p__Firmicutes | c__Clostridia | o__Clostridiales | f__ | g__ | s__ |
| 323818  | k__Bacteria | p__Firmicutes | c__Clostridia | o__Clostridiales | f__ | g__ | s__ |
| 183517  | k__Bacteria | p__Firmicutes | c__Clostridia | o__Clostridiales | f__ | g__ | s__ |
| 301012  | k__Bacteria | p__Firmicutes | c__Clostridia | o__Clostridiales | f__ | g__ | s__ |
| 192741  | k__Bacteria | p__Firmicutes | c__Clostridia | o__Clostridiales | f__ | g__ | s__ |
| 309441  | k__Bacteria | p__Firmicutes | c__Clostridia | o__Clostridiales | f__ | g__ | s__ |
| 191502  | k__Bacteria | p__Firmicutes | c__Clostridia | o__Clostridiales | f__ | g__ | s__ |
| 185923  | k__Bacteria | p__Firmicutes | c__Clostridia | o__Clostridiales | f__ | g__ | s__ |
| 341007  | k__Bacteria | p__Firmicutes | c__Clostridia | o__Clostridiales | f__ | g__ | s__ |
| 182079  | k__Bacteria | p__Firmicutes | c__Clostridia | o__Clostridiales | f__ | g__ | s__ |
| 295410  | k__Bacteria | p__Firmicutes | c__Clostridia | o__Clostridiales | f__ | g__ | s__ |
| 1110312 | k__Bacteria | p__Firmicutes | c__Clostridia | o__Clostridiales | f__ | g__ | s__ |
| 228232  | k__Bacteria | p__Firmicutes | c__Clostridia | o__Clostridiales | f__ | g__ | s__ |
| 348377  | k__Bacteria | p__Firmicutes | c__Clostridia | o__Clostridiales | f__ | g__ | s__ |
| 516977  | k__Bacteria | p__Firmicutes | c__Clostridia | o__Clostridiales | f__ | g__ | s__ |
| 561312  | k__Bacteria | p__Firmicutes | c__Clostridia | o__Clostridiales | f__ | g__ | s__ |
| 667010  | k__Bacteria | p__Firmicutes | c__Clostridia | o__Clostridiales | f__ | g__ | s__ |
| 4334844 | k__Bacteria | p__Firmicutes | c__Clostridia | o__Clostridiales | f__ | g__ | s__ |
| 540086  | k__Bacteria | p__Firmicutes | c__Clostridia | o__Clostridiales | f__ | g__ | s__ |
| 440840  | k__Bacteria | p__Firmicutes | c__Clostridia | o__Clostridiales | f__ | g__ | s__ |
| 4322275 | k__Bacteria | p__Firmicutes | c__Clostridia | o__Clostridiales | f__ | g__ | s__ |
| 354501  | k__Bacteria | p__Firmicutes | c__Clostridia | o__Clostridiales | f__ | g__ | s__ |
| 583958  | k__Bacteria | p__Firmicutes | c__Clostridia | o__Clostridiales | f__ | g__ | s__ |
| 47100   | k__Bacteria | p__Firmicutes | c__Clostridia | o__Clostridiales | f__ | g__ | s__ |
| 364736  | k__Bacteria | p__Firmicutes | c__Clostridia | o__Clostridiales | f__ | g__ | s__ |
| 537219  | k__Bacteria | p__Firmicutes | c__Clostridia | o__Clostridiales | f__ | g__ | s__ |
| 377946  | k__Bacteria | p__Firmicutes | c__Clostridia | o__Clostridiales | f__ | g__ | s__ |
| 466409  | k__Bacteria | p__Firmicutes | c__Clostridia | o__Clostridiales | f__ | g__ | s__ |
| 725212  | k__Bacteria | p__Firmicutes | c__Clostridia | o__Clostridiales | f__ | g__ | s__ |
| 541354  | k__Bacteria | p__Firmicutes | c__Clostridia | o__Clostridiales | f__ | g__ | s__ |
| 406247  | k__Bacteria | p__Firmicutes | c__Clostridia | o__Clostridiales | f__ | g__ | s__ |
| 531038  | k__Bacteria | p__Firmicutes | c__Clostridia | o__Clostridiales | f__ | g__ | s__ |
| 640999  | k__Bacteria | p__Firmicutes | c__Clostridia | o__Clostridiales | f__ | g__ | s__ |
| 358439  | k__Bacteria | p__Firmicutes | c__Clostridia | o__Clostridiales | f__ | g__ | s__ |
| 552988  | k__Bacteria | p__Firmicutes | c__Clostridia | o__Clostridiales | f__ | g__ | s__ |
| 349372  | k__Bacteria | p__Firmicutes | c__Clostridia | o__Clostridiales | f__ | g__ | s__ |
| 620319  | k__Bacteria | p__Firmicutes | c__Clostridia | o__Clostridiales | f__ | g__ | s__ |

|         |             |               |               |                  |     |     |     |
|---------|-------------|---------------|---------------|------------------|-----|-----|-----|
| 470382  | k__Bacteria | p__Firmicutes | c__Clostridia | o__Clostridiales | f__ | g__ | s__ |
| 529258  | k__Bacteria | p__Firmicutes | c__Clostridia | o__Clostridiales | f__ | g__ | s__ |
| 589852  | k__Bacteria | p__Firmicutes | c__Clostridia | o__Clostridiales | f__ | g__ | s__ |
| 352192  | k__Bacteria | p__Firmicutes | c__Clostridia | o__Clostridiales | f__ | g__ | s__ |
| 352222  | k__Bacteria | p__Firmicutes | c__Clostridia | o__Clostridiales | f__ | g__ | s__ |
| 382220  | k__Bacteria | p__Firmicutes | c__Clostridia | o__Clostridiales | f__ | g__ | s__ |
| 357471  | k__Bacteria | p__Firmicutes | c__Clostridia | o__Clostridiales | f__ | g__ | s__ |
| 348404  | k__Bacteria | p__Firmicutes | c__Clostridia | o__Clostridiales | f__ | g__ | s__ |
| 458550  | k__Bacteria | p__Firmicutes | c__Clostridia | o__Clostridiales | f__ | g__ | s__ |
| 362450  | k__Bacteria | p__Firmicutes | c__Clostridia | o__Clostridiales | f__ | g__ | s__ |
| 4416396 | k__Bacteria | p__Firmicutes | c__Clostridia | o__Clostridiales | f__ | g__ | s__ |
| 4453903 | k__Bacteria | p__Firmicutes | c__Clostridia | o__Clostridiales | f__ | g__ | s__ |
| 593422  | k__Bacteria | p__Firmicutes | c__Clostridia | o__Clostridiales | f__ | g__ | s__ |
| 530049  | k__Bacteria | p__Firmicutes | c__Clostridia | o__Clostridiales | f__ | g__ | s__ |
| 360158  | k__Bacteria | p__Firmicutes | c__Clostridia | o__Clostridiales | f__ | g__ | s__ |
| 4480176 | k__Bacteria | p__Firmicutes | c__Clostridia | o__Clostridiales | f__ | g__ | s__ |
| 4433876 | k__Bacteria | p__Firmicutes | c__Clostridia | o__Clostridiales | f__ | g__ | s__ |
| 355187  | k__Bacteria | p__Firmicutes | c__Clostridia | o__Clostridiales | f__ | g__ | s__ |
| 668257  | k__Bacteria | p__Firmicutes | c__Clostridia | o__Clostridiales | f__ | g__ | s__ |
| 581003  | k__Bacteria | p__Firmicutes | c__Clostridia | o__Clostridiales | f__ | g__ | s__ |
| 592513  | k__Bacteria | p__Firmicutes | c__Clostridia | o__Clostridiales | f__ | g__ | s__ |
| 566391  | k__Bacteria | p__Firmicutes | c__Clostridia | o__Clostridiales | f__ | g__ | s__ |
| 522961  | k__Bacteria | p__Firmicutes | c__Clostridia | o__Clostridiales | f__ | g__ | s__ |
| 621649  | k__Bacteria | p__Firmicutes | c__Clostridia | o__Clostridiales | f__ | g__ | s__ |
| 360315  | k__Bacteria | p__Firmicutes | c__Clostridia | o__Clostridiales | f__ | g__ | s__ |
| 373928  | k__Bacteria | p__Firmicutes | c__Clostridia | o__Clostridiales | f__ | g__ | s__ |
| 4368944 | k__Bacteria | p__Firmicutes | c__Clostridia | o__Clostridiales | f__ | g__ | s__ |
| 352902  | k__Bacteria | p__Firmicutes | c__Clostridia | o__Clostridiales | f__ | g__ | s__ |
| 577512  | k__Bacteria | p__Firmicutes | c__Clostridia | o__Clostridiales | f__ | g__ | s__ |
| 510377  | k__Bacteria | p__Firmicutes | c__Clostridia | o__Clostridiales | f__ | g__ | s__ |
| 418334  | k__Bacteria | p__Firmicutes | c__Clostridia | o__Clostridiales | f__ | g__ | s__ |
| 4418016 | k__Bacteria | p__Firmicutes | c__Clostridia | o__Clostridiales | f__ | g__ | s__ |
| 453405  | k__Bacteria | p__Firmicutes | c__Clostridia | o__Clostridiales | f__ | g__ | s__ |
| 352049  | k__Bacteria | p__Firmicutes | c__Clostridia | o__Clostridiales | f__ | g__ | s__ |
| 518040  | k__Bacteria | p__Firmicutes | c__Clostridia | o__Clostridiales | f__ | g__ | s__ |
| 356590  | k__Bacteria | p__Firmicutes | c__Clostridia | o__Clostridiales | f__ | g__ | s__ |
| 365484  | k__Bacteria | p__Firmicutes | c__Clostridia | o__Clostridiales | f__ | g__ | s__ |

|                                |             |               |               |                  |     |     |     |
|--------------------------------|-------------|---------------|---------------|------------------|-----|-----|-----|
| 534042                         | k__Bacteria | p__Firmicutes | c__Clostridia | o__Clostridiales | f__ | g__ | s__ |
| 584107                         | k__Bacteria | p__Firmicutes | c__Clostridia | o__Clostridiales | f__ | g__ | s__ |
| 560873                         | k__Bacteria | p__Firmicutes | c__Clostridia | o__Clostridiales | f__ | g__ | s__ |
| 354854                         | k__Bacteria | p__Firmicutes | c__Clostridia | o__Clostridiales | f__ | g__ | s__ |
| New.CleanUp.ReferenceOTU101586 | k__Bacteria | p__Firmicutes | c__Clostridia | o__Clostridiales | f__ | g__ | s__ |
| 833458                         | k__Bacteria | p__Firmicutes | c__Clostridia | o__Clostridiales | f__ | g__ | s__ |
| 754283                         | k__Bacteria | p__Firmicutes | c__Clostridia | o__Clostridiales | f__ | g__ | s__ |
| 772972                         | k__Bacteria | p__Firmicutes | c__Clostridia | o__Clostridiales | f__ | g__ | s__ |
| New.CleanUp.ReferenceOTU1003   | k__Bacteria | p__Firmicutes | c__Clostridia | o__Clostridiales | f__ | g__ | s__ |
| New.ReferenceOTU552            | k__Bacteria | p__Firmicutes | c__Clostridia | o__Clostridiales | f__ | g__ | s__ |
| 899195                         | k__Bacteria | p__Firmicutes | c__Clostridia | o__Clostridiales | f__ | g__ | s__ |
| 825939                         | k__Bacteria | p__Firmicutes | c__Clostridia | o__Clostridiales | f__ | g__ | s__ |
| 826624                         | k__Bacteria | p__Firmicutes | c__Clostridia | o__Clostridiales | f__ | g__ | s__ |
| 798164                         | k__Bacteria | p__Firmicutes | c__Clostridia | o__Clostridiales | f__ | g__ | s__ |
| 769075                         | k__Bacteria | p__Firmicutes | c__Clostridia | o__Clostridiales | f__ | g__ | s__ |
| 772384                         | k__Bacteria | p__Firmicutes | c__Clostridia | o__Clostridiales | f__ | g__ | s__ |
| New.CleanUp.ReferenceOTU10036  | k__Bacteria | p__Firmicutes | c__Clostridia | o__Clostridiales | f__ | g__ | s__ |
| New.CleanUp.ReferenceOTU104083 | k__Bacteria | p__Firmicutes | c__Clostridia | o__Clostridiales | f__ | g__ | s__ |
| New.CleanUp.ReferenceOTU104493 | k__Bacteria | p__Firmicutes | c__Clostridia | o__Clostridiales | f__ | g__ | s__ |
| New.CleanUp.ReferenceOTU108350 | k__Bacteria | p__Firmicutes | c__Clostridia | o__Clostridiales | f__ | g__ | s__ |
| New.CleanUp.ReferenceOTU11306  | k__Bacteria | p__Firmicutes | c__Clostridia | o__Clostridiales | f__ | g__ | s__ |
| New.CleanUp.ReferenceOTU115736 | k__Bacteria | p__Firmicutes | c__Clostridia | o__Clostridiales | f__ | g__ | s__ |
| New.CleanUp.ReferenceOTU111073 | k__Bacteria | p__Firmicutes | c__Clostridia | o__Clostridiales | f__ | g__ | s__ |
| New.CleanUp.ReferenceOTU112994 | k__Bacteria | p__Firmicutes | c__Clostridia | o__Clostridiales | f__ | g__ | s__ |
| New.CleanUp.ReferenceOTU112776 | k__Bacteria | p__Firmicutes | c__Clostridia | o__Clostridiales | f__ | g__ | s__ |
| New.CleanUp.ReferenceOTU122498 | k__Bacteria | p__Firmicutes | c__Clostridia | o__Clostridiales | f__ | g__ | s__ |
| New.CleanUp.ReferenceOTU120809 | k__Bacteria | p__Firmicutes | c__Clostridia | o__Clostridiales | f__ | g__ | s__ |
| New.CleanUp.ReferenceOTU122552 | k__Bacteria | p__Firmicutes | c__Clostridia | o__Clostridiales | f__ | g__ | s__ |
| New.CleanUp.ReferenceOTU11706  | k__Bacteria | p__Firmicutes | c__Clostridia | o__Clostridiales | f__ | g__ | s__ |
| New.CleanUp.ReferenceOTU122575 | k__Bacteria | p__Firmicutes | c__Clostridia | o__Clostridiales | f__ | g__ | s__ |
| New.CleanUp.ReferenceOTU123354 | k__Bacteria | p__Firmicutes | c__Clostridia | o__Clostridiales | f__ | g__ | s__ |
| New.CleanUp.ReferenceOTU124063 | k__Bacteria | p__Firmicutes | c__Clostridia | o__Clostridiales | f__ | g__ | s__ |
| New.CleanUp.ReferenceOTU129083 | k__Bacteria | p__Firmicutes | c__Clostridia | o__Clostridiales | f__ | g__ | s__ |
| New.CleanUp.ReferenceOTU129756 | k__Bacteria | p__Firmicutes | c__Clostridia | o__Clostridiales | f__ | g__ | s__ |
| New.CleanUp.ReferenceOTU126710 | k__Bacteria | p__Firmicutes | c__Clostridia | o__Clostridiales | f__ | g__ | s__ |
| New.CleanUp.ReferenceOTU128504 | k__Bacteria | p__Firmicutes | c__Clostridia | o__Clostridiales | f__ | g__ | s__ |
| New.CleanUp.ReferenceOTU132011 | k__Bacteria | p__Firmicutes | c__Clostridia | o__Clostridiales | f__ | g__ | s__ |

[illegible]

[illegible]

[illegible]

|                                |             |                  |                |                  |                         |                   |     |
|--------------------------------|-------------|------------------|----------------|------------------|-------------------------|-------------------|-----|
| New.CleanUp.ReferenceOTU91435  | k__Bacteria | p__Firmicutes    | c__Clostridia  | o__Clostridiales | f__                     | g__               | s__ |
| New.CleanUp.ReferenceOTU87271  | k__Bacteria | p__Firmicutes    | c__Clostridia  | o__Clostridiales | f__                     | g__               | s__ |
| New.CleanUp.ReferenceOTU88308  | k__Bacteria | p__Firmicutes    | c__Clostridia  | o__Clostridiales | f__                     | g__               | s__ |
| New.CleanUp.ReferenceOTU91321  | k__Bacteria | p__Firmicutes    | c__Clostridia  | o__Clostridiales | f__                     | g__               | s__ |
| New.CleanUp.ReferenceOTU96698  | k__Bacteria | p__Firmicutes    | c__Clostridia  | o__Clostridiales | f__                     | g__               | s__ |
| New.CleanUp.ReferenceOTU97871  | k__Bacteria | p__Firmicutes    | c__Clostridia  | o__Clostridiales | f__                     | g__               | s__ |
| New.CleanUp.ReferenceOTU96245  | k__Bacteria | p__Firmicutes    | c__Clostridia  | o__Clostridiales | f__                     | g__               | s__ |
| New.CleanUp.ReferenceOTU96655  | k__Bacteria | p__Firmicutes    | c__Clostridia  | o__Clostridiales | f__                     | g__               | s__ |
| New.CleanUp.ReferenceOTU99856  | k__Bacteria | p__Firmicutes    | c__Clostridia  | o__Clostridiales | f__                     | g__               | s__ |
| New.CleanUp.ReferenceOTU96284  | k__Bacteria | p__Firmicutes    | c__Clostridia  | o__Clostridiales | f__                     | g__               | s__ |
| 336518                         | k__Bacteria | p__Bacteroidetes | c__Bacteroidia | o__Bacteroidales | f__[Paraprevotellaceae] | g__[Prevotella]   | s__ |
| 1033345                        | k__Bacteria | p__Bacteroidetes | c__Bacteroidia | o__Bacteroidales | f__[Paraprevotellaceae] | g__[Prevotella]   | s__ |
| 20534                          | k__Bacteria | p__Bacteroidetes | c__Bacteroidia | o__Bacteroidales | f__[Paraprevotellaceae] | g__[Prevotella]   | s__ |
| 522858                         | k__Bacteria | p__Bacteroidetes | c__Bacteroidia | o__Bacteroidales | f__[Paraprevotellaceae] | g__[Prevotella]   | s__ |
| 531596                         | k__Bacteria | p__Bacteroidetes | c__Bacteroidia | o__Bacteroidales | f__[Paraprevotellaceae] | g__[Prevotella]   | s__ |
| 3862524                        | k__Bacteria | p__Bacteroidetes | c__Bacteroidia | o__Bacteroidales | f__[Paraprevotellaceae] | g__[Prevotella]   | s__ |
| 527408                         | k__Bacteria | p__Bacteroidetes | c__Bacteroidia | o__Bacteroidales | f__[Paraprevotellaceae] | g__[Prevotella]   | s__ |
| 4419379                        | k__Bacteria | p__Bacteroidetes | c__Bacteroidia | o__Bacteroidales | f__[Paraprevotellaceae] | g__[Prevotella]   | s__ |
| 515074                         | k__Bacteria | p__Bacteroidetes | c__Bacteroidia | o__Bacteroidales | f__[Paraprevotellaceae] | g__[Prevotella]   | s__ |
| 527437                         | k__Bacteria | p__Bacteroidetes | c__Bacteroidia | o__Bacteroidales | f__[Paraprevotellaceae] | g__[Prevotella]   | s__ |
| 73937                          | k__Bacteria | p__Bacteroidetes | c__Bacteroidia | o__Bacteroidales | f__[Paraprevotellaceae] | g__[Prevotella]   | s__ |
| New.CleanUp.ReferenceOTU167791 | k__Bacteria | p__Bacteroidetes | c__Bacteroidia | o__Bacteroidales | f__[Paraprevotellaceae] | g__[Prevotella]   | s__ |
| New.CleanUp.ReferenceOTU202971 | k__Bacteria | p__Bacteroidetes | c__Bacteroidia | o__Bacteroidales | f__[Paraprevotellaceae] | g__[Prevotella]   | s__ |
| New.CleanUp.ReferenceOTU27216  | k__Bacteria | p__Bacteroidetes | c__Bacteroidia | o__Bacteroidales | f__[Paraprevotellaceae] | g__[Prevotella]   | s__ |
| New.CleanUp.ReferenceOTU31050  | k__Bacteria | p__Bacteroidetes | c__Bacteroidia | o__Bacteroidales | f__[Paraprevotellaceae] | g__[Prevotella]   | s__ |
| New.CleanUp.ReferenceOTU86108  | k__Bacteria | p__Bacteroidetes | c__Bacteroidia | o__Bacteroidales | f__[Paraprevotellaceae] | g__[Prevotella]   | s__ |
| 165118                         | k__Bacteria | p__Bacteroidetes | c__Bacteroidia | o__Bacteroidales | f__[Paraprevotellaceae] | g__Paraprevotella | s__ |
| 1106254                        | k__Bacteria | p__Bacteroidetes | c__Bacteroidia | o__Bacteroidales | f__[Paraprevotellaceae] | g__Paraprevotella | s__ |
| 366147                         | k__Bacteria | p__Bacteroidetes | c__Bacteroidia | o__Bacteroidales | f__[Paraprevotellaceae] | g__Paraprevotella | s__ |
| 22466                          | k__Bacteria | p__Bacteroidetes | c__Bacteroidia | o__Bacteroidales | f__Prevotellaceae       | g__Prevotella     | s__ |
| 288265                         | k__Bacteria | p__Bacteroidetes | c__Bacteroidia | o__Bacteroidales | f__Prevotellaceae       | g__Prevotella     | s__ |
| 324283                         | k__Bacteria | p__Bacteroidetes | c__Bacteroidia | o__Bacteroidales | f__Prevotellaceae       | g__Prevotella     | s__ |
| 300859                         | k__Bacteria | p__Bacteroidetes | c__Bacteroidia | o__Bacteroidales | f__Prevotellaceae       | g__Prevotella     | s__ |
| 261240                         | k__Bacteria | p__Bacteroidetes | c__Bacteroidia | o__Bacteroidales | f__Prevotellaceae       | g__Prevotella     | s__ |
| 1061134                        | k__Bacteria | p__Bacteroidetes | c__Bacteroidia | o__Bacteroidales | f__Prevotellaceae       | g__Prevotella     | s__ |
| 301251                         | k__Bacteria | p__Bacteroidetes | c__Bacteroidia | o__Bacteroidales | f__Prevotellaceae       | g__Prevotella     | s__ |
| 343443                         | k__Bacteria | p__Bacteroidetes | c__Bacteroidia | o__Bacteroidales | f__Prevotellaceae       | g__Prevotella     | s__ |

[illegible]



[illegible]

[illegible]

|                                |            |                   |               |                   |                    |                   |               |
|--------------------------------|------------|-------------------|---------------|-------------------|--------------------|-------------------|---------------|
| 999477                         | k_Bacteria | p_Bacteroidetes   | c_Bacteroidia | o_Bacteroidales   | f_Prevotellaceae   | g_Prevotella      | s_nanceiensis |
| 4321398                        | k_Bacteria | p_Bacteroidetes   | c_Bacteroidia | o_Bacteroidales   | f_Prevotellaceae   | g_Prevotella      | s_pallens     |
| 299770                         | k_Bacteria | p_Bacteroidetes   | c_Bacteroidia | o_Bacteroidales   | f_Prevotellaceae   | g_Prevotella      | s_stercorea   |
| 347138                         | k_Bacteria | p_Bacteroidetes   | c_Bacteroidia | o_Bacteroidales   | f_Prevotellaceae   | g_Prevotella      | s_stercorea   |
| 299382                         | k_Bacteria | p_Bacteroidetes   | c_Bacteroidia | o_Bacteroidales   | f_Prevotellaceae   | g_Prevotella      | s_stercorea   |
| 524371                         | k_Bacteria | p_Bacteroidetes   | c_Bacteroidia | o_Bacteroidales   | f_Prevotellaceae   | g_Prevotella      | s_stercorea   |
| 591785                         | k_Bacteria | p_Bacteroidetes   | c_Bacteroidia | o_Bacteroidales   | f_Prevotellaceae   | g_Prevotella      | s_stercorea   |
| New.CleanUp.ReferenceOTU22563  | k_Bacteria | p_Bacteroidetes   | c_Bacteroidia | o_Bacteroidales   | f_Prevotellaceae   | g_Prevotella      | s_stercorea   |
| New.CleanUp.ReferenceOTU57503  | k_Bacteria | p_Bacteroidetes   | c_Bacteroidia | o_Bacteroidales   | f_Prevotellaceae   | g_Prevotella      | s_stercorea   |
| 332206                         | k_Bacteria | p_Verrucomicrobia | c_Opitutae    | o_Puniceicoccales | f_Puniceicoccaceae | g_Coralimargarita | s_            |
| 151344                         | k_Bacteria | p_Verrucomicrobia | c_Opitutae    | o_Puniceicoccales | f_Puniceicoccaceae | g_Coralimargarita | s_            |
| 337963                         | k_Bacteria | p_Verrucomicrobia | c_Opitutae    | o_Puniceicoccales | f_Puniceicoccaceae | g_Coralimargarita | s_            |
| 245143                         | k_Bacteria | p_Verrucomicrobia | c_Opitutae    | o_Puniceicoccales | f_Puniceicoccaceae | g_Coralimargarita | s_            |
| 4369318                        | k_Bacteria | p_Verrucomicrobia | c_Opitutae    | o_Puniceicoccales | f_Puniceicoccaceae | g_Coralimargarita | s_            |
| 712002                         | k_Bacteria | p_Verrucomicrobia | c_Opitutae    | o_Puniceicoccales | f_Puniceicoccaceae | g_Coralimargarita | s_            |
| 4229057                        | k_Bacteria | p_Verrucomicrobia | c_Opitutae    | o_Puniceicoccales | f_Puniceicoccaceae | g_Coralimargarita | s_            |
| 4340872                        | k_Bacteria | p_Verrucomicrobia | c_Opitutae    | o_Puniceicoccales | f_Puniceicoccaceae | g_Coralimargarita | s_            |
| 41135                          | k_Bacteria | p_Verrucomicrobia | c_Opitutae    | o_Puniceicoccales | f_Puniceicoccaceae | g_Coralimargarita | s_            |
| New.CleanUp.ReferenceOTU101912 | k_Bacteria | p_Verrucomicrobia | c_Opitutae    | o_Puniceicoccales | f_Puniceicoccaceae | g_Coralimargarita | s_            |
| 812914                         | k_Bacteria | p_Verrucomicrobia | c_Opitutae    | o_Puniceicoccales | f_Puniceicoccaceae | g_Coralimargarita | s_            |
| New.ReferenceOTU425            | k_Bacteria | p_Verrucomicrobia | c_Opitutae    | o_Puniceicoccales | f_Puniceicoccaceae | g_Coralimargarita | s_            |
| 966092                         | k_Bacteria | p_Verrucomicrobia | c_Opitutae    | o_Puniceicoccales | f_Puniceicoccaceae | g_Coralimargarita | s_            |
| New.CleanUp.ReferenceOTU102076 | k_Bacteria | p_Verrucomicrobia | c_Opitutae    | o_Puniceicoccales | f_Puniceicoccaceae | g_Coralimargarita | s_            |
| New.ReferenceOTU335            | k_Bacteria | p_Verrucomicrobia | c_Opitutae    | o_Puniceicoccales | f_Puniceicoccaceae | g_Coralimargarita | s_            |
| 778530                         | k_Bacteria | p_Verrucomicrobia | c_Opitutae    | o_Puniceicoccales | f_Puniceicoccaceae | g_Coralimargarita | s_            |
| New.CleanUp.ReferenceOTU106557 | k_Bacteria | p_Verrucomicrobia | c_Opitutae    | o_Puniceicoccales | f_Puniceicoccaceae | g_Coralimargarita | s_            |
| New.CleanUp.ReferenceOTU112242 | k_Bacteria | p_Verrucomicrobia | c_Opitutae    | o_Puniceicoccales | f_Puniceicoccaceae | g_Coralimargarita | s_            |
| New.CleanUp.ReferenceOTU116000 | k_Bacteria | p_Verrucomicrobia | c_Opitutae    | o_Puniceicoccales | f_Puniceicoccaceae | g_Coralimargarita | s_            |
| New.CleanUp.ReferenceOTU111270 | k_Bacteria | p_Verrucomicrobia | c_Opitutae    | o_Puniceicoccales | f_Puniceicoccaceae | g_Coralimargarita | s_            |
| New.CleanUp.ReferenceOTU1110   | k_Bacteria | p_Verrucomicrobia | c_Opitutae    | o_Puniceicoccales | f_Puniceicoccaceae | g_Coralimargarita | s_            |
| New.CleanUp.ReferenceOTU120218 | k_Bacteria | p_Verrucomicrobia | c_Opitutae    | o_Puniceicoccales | f_Puniceicoccaceae | g_Coralimargarita | s_            |
| New.CleanUp.ReferenceOTU12117  | k_Bacteria | p_Verrucomicrobia | c_Opitutae    | o_Puniceicoccales | f_Puniceicoccaceae | g_Coralimargarita | s_            |
| New.CleanUp.ReferenceOTU11705  | k_Bacteria | p_Verrucomicrobia | c_Opitutae    | o_Puniceicoccales | f_Puniceicoccaceae | g_Coralimargarita | s_            |
| New.CleanUp.ReferenceOTU117448 | k_Bacteria | p_Verrucomicrobia | c_Opitutae    | o_Puniceicoccales | f_Puniceicoccaceae | g_Coralimargarita | s_            |
| New.CleanUp.ReferenceOTU118545 | k_Bacteria | p_Verrucomicrobia | c_Opitutae    | o_Puniceicoccales | f_Puniceicoccaceae | g_Coralimargarita | s_            |
| New.CleanUp.ReferenceOTU119869 | k_Bacteria | p_Verrucomicrobia | c_Opitutae    | o_Puniceicoccales | f_Puniceicoccaceae | g_Coralimargarita | s_            |
| New.CleanUp.ReferenceOTU121070 | k_Bacteria | p_Verrucomicrobia | c_Opitutae    | o_Puniceicoccales | f_Puniceicoccaceae | g_Coralimargarita | s_            |

[illegible]

[illegible]

[illegible]

[illegible]

[illegible]



[illegible]

[illegible]







































[illegible]

[illegible]













































[illegible]

[illegible]

[illegible]

[illegible]

[illegible]

[illegible]

[illegible]

[illegible]



[illegible]

[illegible]

[illegible]

[illegible]

[illegible]

[illegible]

[illegible]

[illegible]



[illegible]

[illegible]

[illegible]

[illegible]

[illegible]

[illegible]

[illegible]

[illegible]



[illegible]

[illegible]

[illegible]

[illegible]

[illegible]

[illegible]

[illegible]

[illegible]



[illegible]

[illegible]

[illegible]

[illegible]

[illegible]

[illegible]

[illegible]

[illegible]



[illegible]

[illegible]

[illegible]

[illegible]

[illegible]

[illegible]

|                               |            |                  |                  |                    |        |     |     |
|-------------------------------|------------|------------------|------------------|--------------------|--------|-----|-----|
| New.CleanUp.ReferenceOTU61076 | k_Bacteria | p_Planctomycetes | c_Phycisphaerae  | o_Phycisphaerales  | f__    | g__ | s__ |
| New.CleanUp.ReferenceOTU59071 | k_Bacteria | p_Planctomycetes | c_Phycisphaerae  | o_Phycisphaerales  | f__    | g__ | s__ |
| New.CleanUp.ReferenceOTU57506 | k_Bacteria | p_Planctomycetes | c_Phycisphaerae  | o_Phycisphaerales  | f__    | g__ | s__ |
| New.CleanUp.ReferenceOTU61905 | k_Bacteria | p_Planctomycetes | c_Phycisphaerae  | o_Phycisphaerales  | f__    | g__ | s__ |
| New.CleanUp.ReferenceOTU68786 | k_Bacteria | p_Planctomycetes | c_Phycisphaerae  | o_Phycisphaerales  | f__    | g__ | s__ |
| New.CleanUp.ReferenceOTU64118 | k_Bacteria | p_Planctomycetes | c_Phycisphaerae  | o_Phycisphaerales  | f__    | g__ | s__ |
| New.CleanUp.ReferenceOTU75608 | k_Bacteria | p_Planctomycetes | c_Phycisphaerae  | o_Phycisphaerales  | f__    | g__ | s__ |
| New.CleanUp.ReferenceOTU75494 | k_Bacteria | p_Planctomycetes | c_Phycisphaerae  | o_Phycisphaerales  | f__    | g__ | s__ |
| New.CleanUp.ReferenceOTU75788 | k_Bacteria | p_Planctomycetes | c_Phycisphaerae  | o_Phycisphaerales  | f__    | g__ | s__ |
| New.CleanUp.ReferenceOTU75209 | k_Bacteria | p_Planctomycetes | c_Phycisphaerae  | o_Phycisphaerales  | f__    | g__ | s__ |
| New.CleanUp.ReferenceOTU85396 | k_Bacteria | p_Planctomycetes | c_Phycisphaerae  | o_Phycisphaerales  | f__    | g__ | s__ |
| New.CleanUp.ReferenceOTU79279 | k_Bacteria | p_Planctomycetes | c_Phycisphaerae  | o_Phycisphaerales  | f__    | g__ | s__ |
| New.CleanUp.ReferenceOTU89068 | k_Bacteria | p_Planctomycetes | c_Phycisphaerae  | o_Phycisphaerales  | f__    | g__ | s__ |
| New.CleanUp.ReferenceOTU88747 | k_Bacteria | p_Planctomycetes | c_Phycisphaerae  | o_Phycisphaerales  | f__    | g__ | s__ |
| New.CleanUp.ReferenceOTU89453 | k_Bacteria | p_Planctomycetes | c_Phycisphaerae  | o_Phycisphaerales  | f__    | g__ | s__ |
| New.CleanUp.ReferenceOTU90343 | k_Bacteria | p_Planctomycetes | c_Phycisphaerae  | o_Phycisphaerales  | f__    | g__ | s__ |
| New.CleanUp.ReferenceOTU86901 | k_Bacteria | p_Planctomycetes | c_Phycisphaerae  | o_Phycisphaerales  | f__    | g__ | s__ |
| New.CleanUp.ReferenceOTU97098 | k_Bacteria | p_Planctomycetes | c_Phycisphaerae  | o_Phycisphaerales  | f__    | g__ | s__ |
| New.CleanUp.ReferenceOTU96905 | k_Bacteria | p_Planctomycetes | c_Phycisphaerae  | o_Phycisphaerales  | f__    | g__ | s__ |
| New.CleanUp.ReferenceOTU99299 | k_Bacteria | p_Planctomycetes | c_Phycisphaerae  | o_Phycisphaerales  | f__    | g__ | s__ |
| New.CleanUp.ReferenceOTU97516 | k_Bacteria | p_Planctomycetes | c_Phycisphaerae  | o_Phycisphaerales  | f__    | g__ | s__ |
| New.CleanUp.ReferenceOTU94834 | k_Bacteria | p_Planctomycetes | c_Phycisphaerae  | o_Phycisphaerales  | f__    | g__ | s__ |
| 270611                        | k_Bacteria | p_Actinobacteria | c_Acidimicrobiia | o_Acidimicrobiales | f_C111 | g__ | s__ |
| 207715                        | k_Bacteria | p_Actinobacteria | c_Acidimicrobiia | o_Acidimicrobiales | f_C111 | g__ | s__ |
| 312763                        | k_Bacteria | p_Actinobacteria | c_Acidimicrobiia | o_Acidimicrobiales | f_C111 | g__ | s__ |
| 232551                        | k_Bacteria | p_Actinobacteria | c_Acidimicrobiia | o_Acidimicrobiales | f_C111 | g__ | s__ |
| 329883                        | k_Bacteria | p_Actinobacteria | c_Acidimicrobiia | o_Acidimicrobiales | f_C111 | g__ | s__ |
| 310346                        | k_Bacteria | p_Actinobacteria | c_Acidimicrobiia | o_Acidimicrobiales | f_C111 | g__ | s__ |
| 263082                        | k_Bacteria | p_Actinobacteria | c_Acidimicrobiia | o_Acidimicrobiales | f_C111 | g__ | s__ |
| 260261                        | k_Bacteria | p_Actinobacteria | c_Acidimicrobiia | o_Acidimicrobiales | f_C111 | g__ | s__ |
| 4423575                       | k_Bacteria | p_Actinobacteria | c_Acidimicrobiia | o_Acidimicrobiales | f_C111 | g__ | s__ |
| 583303                        | k_Bacteria | p_Actinobacteria | c_Acidimicrobiia | o_Acidimicrobiales | f_C111 | g__ | s__ |
| 509624                        | k_Bacteria | p_Actinobacteria | c_Acidimicrobiia | o_Acidimicrobiales | f_C111 | g__ | s__ |
| 606789                        | k_Bacteria | p_Actinobacteria | c_Acidimicrobiia | o_Acidimicrobiales | f_C111 | g__ | s__ |
| 354357                        | k_Bacteria | p_Actinobacteria | c_Acidimicrobiia | o_Acidimicrobiales | f_C111 | g__ | s__ |
| 537516                        | k_Bacteria | p_Actinobacteria | c_Acidimicrobiia | o_Acidimicrobiales | f_C111 | g__ | s__ |
| 552866                        | k_Bacteria | p_Actinobacteria | c_Acidimicrobiia | o_Acidimicrobiales | f_C111 | g__ | s__ |

[illegible]



[illegible]

[illegible]

[illegible]

[illegible]

[illegible]

[illegible]

[illegible]

|                                |             |                  |                   |                     |     |     |     |
|--------------------------------|-------------|------------------|-------------------|---------------------|-----|-----|-----|
| 156530                         | k__Bacteria | p__Bacteroidetes | c__Flavobacteriia | o__Flavobacteriales | f__ | g__ | s__ |
| 334486                         | k__Bacteria | p__Bacteroidetes | c__Flavobacteriia | o__Flavobacteriales | f__ | g__ | s__ |
| 1109032                        | k__Bacteria | p__Bacteroidetes | c__Flavobacteriia | o__Flavobacteriales | f__ | g__ | s__ |
| 234515                         | k__Bacteria | p__Bacteroidetes | c__Flavobacteriia | o__Flavobacteriales | f__ | g__ | s__ |
| 253327                         | k__Bacteria | p__Bacteroidetes | c__Flavobacteriia | o__Flavobacteriales | f__ | g__ | s__ |
| 246959                         | k__Bacteria | p__Bacteroidetes | c__Flavobacteriia | o__Flavobacteriales | f__ | g__ | s__ |
| 1123903                        | k__Bacteria | p__Bacteroidetes | c__Flavobacteriia | o__Flavobacteriales | f__ | g__ | s__ |
| 235889                         | k__Bacteria | p__Bacteroidetes | c__Flavobacteriia | o__Flavobacteriales | f__ | g__ | s__ |
| 171966                         | k__Bacteria | p__Bacteroidetes | c__Flavobacteriia | o__Flavobacteriales | f__ | g__ | s__ |
| 243972                         | k__Bacteria | p__Bacteroidetes | c__Flavobacteriia | o__Flavobacteriales | f__ | g__ | s__ |
| 3651717                        | k__Bacteria | p__Bacteroidetes | c__Flavobacteriia | o__Flavobacteriales | f__ | g__ | s__ |
| 569884                         | k__Bacteria | p__Bacteroidetes | c__Flavobacteriia | o__Flavobacteriales | f__ | g__ | s__ |
| 4419588                        | k__Bacteria | p__Bacteroidetes | c__Flavobacteriia | o__Flavobacteriales | f__ | g__ | s__ |
| 560135                         | k__Bacteria | p__Bacteroidetes | c__Flavobacteriia | o__Flavobacteriales | f__ | g__ | s__ |
| 561881                         | k__Bacteria | p__Bacteroidetes | c__Flavobacteriia | o__Flavobacteriales | f__ | g__ | s__ |
| 539543                         | k__Bacteria | p__Bacteroidetes | c__Flavobacteriia | o__Flavobacteriales | f__ | g__ | s__ |
| 544270                         | k__Bacteria | p__Bacteroidetes | c__Flavobacteriia | o__Flavobacteriales | f__ | g__ | s__ |
| 541389                         | k__Bacteria | p__Bacteroidetes | c__Flavobacteriia | o__Flavobacteriales | f__ | g__ | s__ |
| 562142                         | k__Bacteria | p__Bacteroidetes | c__Flavobacteriia | o__Flavobacteriales | f__ | g__ | s__ |
| 4401772                        | k__Bacteria | p__Bacteroidetes | c__Flavobacteriia | o__Flavobacteriales | f__ | g__ | s__ |
| 4331915                        | k__Bacteria | p__Bacteroidetes | c__Flavobacteriia | o__Flavobacteriales | f__ | g__ | s__ |
| 3751007                        | k__Bacteria | p__Bacteroidetes | c__Flavobacteriia | o__Flavobacteriales | f__ | g__ | s__ |
| 585674                         | k__Bacteria | p__Bacteroidetes | c__Flavobacteriia | o__Flavobacteriales | f__ | g__ | s__ |
| 668402                         | k__Bacteria | p__Bacteroidetes | c__Flavobacteriia | o__Flavobacteriales | f__ | g__ | s__ |
| 940958                         | k__Bacteria | p__Bacteroidetes | c__Flavobacteriia | o__Flavobacteriales | f__ | g__ | s__ |
| New.ReferenceOTU118            | k__Bacteria | p__Bacteroidetes | c__Flavobacteriia | o__Flavobacteriales | f__ | g__ | s__ |
| 827967                         | k__Bacteria | p__Bacteroidetes | c__Flavobacteriia | o__Flavobacteriales | f__ | g__ | s__ |
| New.ReferenceOTU540            | k__Bacteria | p__Bacteroidetes | c__Flavobacteriia | o__Flavobacteriales | f__ | g__ | s__ |
| New.ReferenceOTU418            | k__Bacteria | p__Bacteroidetes | c__Flavobacteriia | o__Flavobacteriales | f__ | g__ | s__ |
| 825365                         | k__Bacteria | p__Bacteroidetes | c__Flavobacteriia | o__Flavobacteriales | f__ | g__ | s__ |
| New.CleanUp.ReferenceOTU101673 | k__Bacteria | p__Bacteroidetes | c__Flavobacteriia | o__Flavobacteriales | f__ | g__ | s__ |
| New.CleanUp.ReferenceOTU101264 | k__Bacteria | p__Bacteroidetes | c__Flavobacteriia | o__Flavobacteriales | f__ | g__ | s__ |
| New.CleanUp.ReferenceOTU100339 | k__Bacteria | p__Bacteroidetes | c__Flavobacteriia | o__Flavobacteriales | f__ | g__ | s__ |
| New.CleanUp.ReferenceOTU101030 | k__Bacteria | p__Bacteroidetes | c__Flavobacteriia | o__Flavobacteriales | f__ | g__ | s__ |
| New.CleanUp.ReferenceOTU101329 | k__Bacteria | p__Bacteroidetes | c__Flavobacteriia | o__Flavobacteriales | f__ | g__ | s__ |
| New.ReferenceOTU256            | k__Bacteria | p__Bacteroidetes | c__Flavobacteriia | o__Flavobacteriales | f__ | g__ | s__ |
| New.CleanUp.ReferenceOTU100837 | k__Bacteria | p__Bacteroidetes | c__Flavobacteriia | o__Flavobacteriales | f__ | g__ | s__ |



[illegible]

[illegible]

[illegible]

[illegible]

[illegible]

[illegible]

[illegible]

[illegible]



[illegible]

[illegible]



[illegible]

[illegible]

[illegible]













[illegible]

[illegible]









[illegible]

[illegible]

[illegible]

[illegible]

[illegible]

[illegible]

[illegible]





[illegible]

[illegible]

[illegible]

[illegible]

[illegible]

[illegible]

|                                |             |                    |                        |             |             |     |     |
|--------------------------------|-------------|--------------------|------------------------|-------------|-------------|-----|-----|
| New.CleanUp.ReferenceOTU64120  | k__Bacteria | p__Verrucomicrobia | c__[Pedosphaerae]      | o__         | f__         | g__ | s__ |
| New.CleanUp.ReferenceOTU69265  | k__Bacteria | p__Verrucomicrobia | c__[Pedosphaerae]      | o__         | f__         | g__ | s__ |
| New.CleanUp.ReferenceOTU63780  | k__Bacteria | p__Verrucomicrobia | c__[Pedosphaerae]      | o__         | f__         | g__ | s__ |
| New.CleanUp.ReferenceOTU65147  | k__Bacteria | p__Verrucomicrobia | c__[Pedosphaerae]      | o__         | f__         | g__ | s__ |
| New.CleanUp.ReferenceOTU77837  | k__Bacteria | p__Verrucomicrobia | c__[Pedosphaerae]      | o__         | f__         | g__ | s__ |
| New.CleanUp.ReferenceOTU75489  | k__Bacteria | p__Verrucomicrobia | c__[Pedosphaerae]      | o__         | f__         | g__ | s__ |
| New.CleanUp.ReferenceOTU75424  | k__Bacteria | p__Verrucomicrobia | c__[Pedosphaerae]      | o__         | f__         | g__ | s__ |
| New.CleanUp.ReferenceOTU78047  | k__Bacteria | p__Verrucomicrobia | c__[Pedosphaerae]      | o__         | f__         | g__ | s__ |
| New.CleanUp.ReferenceOTU76285  | k__Bacteria | p__Verrucomicrobia | c__[Pedosphaerae]      | o__         | f__         | g__ | s__ |
| New.CleanUp.ReferenceOTU7360   | k__Bacteria | p__Verrucomicrobia | c__[Pedosphaerae]      | o__         | f__         | g__ | s__ |
| New.CleanUp.ReferenceOTU71747  | k__Bacteria | p__Verrucomicrobia | c__[Pedosphaerae]      | o__         | f__         | g__ | s__ |
| New.CleanUp.ReferenceOTU79389  | k__Bacteria | p__Verrucomicrobia | c__[Pedosphaerae]      | o__         | f__         | g__ | s__ |
| New.CleanUp.ReferenceOTU82012  | k__Bacteria | p__Verrucomicrobia | c__[Pedosphaerae]      | o__         | f__         | g__ | s__ |
| New.CleanUp.ReferenceOTU8517   | k__Bacteria | p__Verrucomicrobia | c__[Pedosphaerae]      | o__         | f__         | g__ | s__ |
| New.CleanUp.ReferenceOTU86184  | k__Bacteria | p__Verrucomicrobia | c__[Pedosphaerae]      | o__         | f__         | g__ | s__ |
| New.CleanUp.ReferenceOTU91464  | k__Bacteria | p__Verrucomicrobia | c__[Pedosphaerae]      | o__         | f__         | g__ | s__ |
| New.CleanUp.ReferenceOTU87124  | k__Bacteria | p__Verrucomicrobia | c__[Pedosphaerae]      | o__         | f__         | g__ | s__ |
| New.CleanUp.ReferenceOTU87785  | k__Bacteria | p__Verrucomicrobia | c__[Pedosphaerae]      | o__         | f__         | g__ | s__ |
| New.CleanUp.ReferenceOTU88916  | k__Bacteria | p__Verrucomicrobia | c__[Pedosphaerae]      | o__         | f__         | g__ | s__ |
| New.CleanUp.ReferenceOTU86649  | k__Bacteria | p__Verrucomicrobia | c__[Pedosphaerae]      | o__         | f__         | g__ | s__ |
| New.CleanUp.ReferenceOTU87521  | k__Bacteria | p__Verrucomicrobia | c__[Pedosphaerae]      | o__         | f__         | g__ | s__ |
| New.CleanUp.ReferenceOTU86949  | k__Bacteria | p__Verrucomicrobia | c__[Pedosphaerae]      | o__         | f__         | g__ | s__ |
| New.CleanUp.ReferenceOTU86958  | k__Bacteria | p__Verrucomicrobia | c__[Pedosphaerae]      | o__         | f__         | g__ | s__ |
| New.CleanUp.ReferenceOTU8815   | k__Bacteria | p__Verrucomicrobia | c__[Pedosphaerae]      | o__         | f__         | g__ | s__ |
| New.CleanUp.ReferenceOTU9026   | k__Bacteria | p__Verrucomicrobia | c__[Pedosphaerae]      | o__         | f__         | g__ | s__ |
| New.CleanUp.ReferenceOTU86977  | k__Bacteria | p__Verrucomicrobia | c__[Pedosphaerae]      | o__         | f__         | g__ | s__ |
| New.CleanUp.ReferenceOTU98791  | k__Bacteria | p__Verrucomicrobia | c__[Pedosphaerae]      | o__         | f__         | g__ | s__ |
| New.CleanUp.ReferenceOTU98494  | k__Bacteria | p__Verrucomicrobia | c__[Pedosphaerae]      | o__         | f__         | g__ | s__ |
| 1108120                        | k__Bacteria | p__Proteobacteria  | c__Gammaproteobacteria | o__HTCC2188 | f__HTCC2089 | g__ | s__ |
| 167947                         | k__Bacteria | p__Proteobacteria  | c__Gammaproteobacteria | o__HTCC2188 | f__HTCC2089 | g__ | s__ |
| 1789522                        | k__Bacteria | p__Proteobacteria  | c__Gammaproteobacteria | o__HTCC2188 | f__HTCC2089 | g__ | s__ |
| 4416718                        | k__Bacteria | p__Proteobacteria  | c__Gammaproteobacteria | o__HTCC2188 | f__HTCC2089 | g__ | s__ |
| 585439                         | k__Bacteria | p__Proteobacteria  | c__Gammaproteobacteria | o__HTCC2188 | f__HTCC2089 | g__ | s__ |
| 611127                         | k__Bacteria | p__Proteobacteria  | c__Gammaproteobacteria | o__HTCC2188 | f__HTCC2089 | g__ | s__ |
| 569669                         | k__Bacteria | p__Proteobacteria  | c__Gammaproteobacteria | o__HTCC2188 | f__HTCC2089 | g__ | s__ |
| 740763                         | k__Bacteria | p__Proteobacteria  | c__Gammaproteobacteria | o__HTCC2188 | f__HTCC2089 | g__ | s__ |
| New.CleanUp.ReferenceOTU101395 | k__Bacteria | p__Proteobacteria  | c__Gammaproteobacteria | o__HTCC2188 | f__HTCC2089 | g__ | s__ |

[illegible]



[illegible]

[illegible]

[illegible]

[illegible]

[illegible]





[illegible]



|                                |             |                   |                        |                 |     |     |     |
|--------------------------------|-------------|-------------------|------------------------|-----------------|-----|-----|-----|
| 1111234                        | k__Bacteria | p__Proteobacteria | c__Gammaproteobacteria | o__Chromatiales | f__ | g__ | s__ |
| 288332                         | k__Bacteria | p__Proteobacteria | c__Gammaproteobacteria | o__Chromatiales | f__ | g__ | s__ |
| 151727                         | k__Bacteria | p__Proteobacteria | c__Gammaproteobacteria | o__Chromatiales | f__ | g__ | s__ |
| 281206                         | k__Bacteria | p__Proteobacteria | c__Gammaproteobacteria | o__Chromatiales | f__ | g__ | s__ |
| 1108144                        | k__Bacteria | p__Proteobacteria | c__Gammaproteobacteria | o__Chromatiales | f__ | g__ | s__ |
| 1134800                        | k__Bacteria | p__Proteobacteria | c__Gammaproteobacteria | o__Chromatiales | f__ | g__ | s__ |
| 575190                         | k__Bacteria | p__Proteobacteria | c__Gammaproteobacteria | o__Chromatiales | f__ | g__ | s__ |
| 4460884                        | k__Bacteria | p__Proteobacteria | c__Gammaproteobacteria | o__Chromatiales | f__ | g__ | s__ |
| 584938                         | k__Bacteria | p__Proteobacteria | c__Gammaproteobacteria | o__Chromatiales | f__ | g__ | s__ |
| 4441050                        | k__Bacteria | p__Proteobacteria | c__Gammaproteobacteria | o__Chromatiales | f__ | g__ | s__ |
| 3735930                        | k__Bacteria | p__Proteobacteria | c__Gammaproteobacteria | o__Chromatiales | f__ | g__ | s__ |
| 568472                         | k__Bacteria | p__Proteobacteria | c__Gammaproteobacteria | o__Chromatiales | f__ | g__ | s__ |
| 518816                         | k__Bacteria | p__Proteobacteria | c__Gammaproteobacteria | o__Chromatiales | f__ | g__ | s__ |
| 41309                          | k__Bacteria | p__Proteobacteria | c__Gammaproteobacteria | o__Chromatiales | f__ | g__ | s__ |
| 533202                         | k__Bacteria | p__Proteobacteria | c__Gammaproteobacteria | o__Chromatiales | f__ | g__ | s__ |
| 4401468                        | k__Bacteria | p__Proteobacteria | c__Gammaproteobacteria | o__Chromatiales | f__ | g__ | s__ |
| 4412052                        | k__Bacteria | p__Proteobacteria | c__Gammaproteobacteria | o__Chromatiales | f__ | g__ | s__ |
| 548568                         | k__Bacteria | p__Proteobacteria | c__Gammaproteobacteria | o__Chromatiales | f__ | g__ | s__ |
| 354483                         | k__Bacteria | p__Proteobacteria | c__Gammaproteobacteria | o__Chromatiales | f__ | g__ | s__ |
| 4387019                        | k__Bacteria | p__Proteobacteria | c__Gammaproteobacteria | o__Chromatiales | f__ | g__ | s__ |
| 519729                         | k__Bacteria | p__Proteobacteria | c__Gammaproteobacteria | o__Chromatiales | f__ | g__ | s__ |
| 627001                         | k__Bacteria | p__Proteobacteria | c__Gammaproteobacteria | o__Chromatiales | f__ | g__ | s__ |
| 4432132                        | k__Bacteria | p__Proteobacteria | c__Gammaproteobacteria | o__Chromatiales | f__ | g__ | s__ |
| 557161                         | k__Bacteria | p__Proteobacteria | c__Gammaproteobacteria | o__Chromatiales | f__ | g__ | s__ |
| 820433                         | k__Bacteria | p__Proteobacteria | c__Gammaproteobacteria | o__Chromatiales | f__ | g__ | s__ |
| New.CleanUp.ReferenceOTU101614 | k__Bacteria | p__Proteobacteria | c__Gammaproteobacteria | o__Chromatiales | f__ | g__ | s__ |
| New.CleanUp.ReferenceOTU100383 | k__Bacteria | p__Proteobacteria | c__Gammaproteobacteria | o__Chromatiales | f__ | g__ | s__ |
| 730193                         | k__Bacteria | p__Proteobacteria | c__Gammaproteobacteria | o__Chromatiales | f__ | g__ | s__ |
| 810785                         | k__Bacteria | p__Proteobacteria | c__Gammaproteobacteria | o__Chromatiales | f__ | g__ | s__ |
| New.ReferenceOTU165            | k__Bacteria | p__Proteobacteria | c__Gammaproteobacteria | o__Chromatiales | f__ | g__ | s__ |
| New.ReferenceOTU39             | k__Bacteria | p__Proteobacteria | c__Gammaproteobacteria | o__Chromatiales | f__ | g__ | s__ |
| 753656                         | k__Bacteria | p__Proteobacteria | c__Gammaproteobacteria | o__Chromatiales | f__ | g__ | s__ |
| 832176                         | k__Bacteria | p__Proteobacteria | c__Gammaproteobacteria | o__Chromatiales | f__ | g__ | s__ |
| New.CleanUp.ReferenceOTU107972 | k__Bacteria | p__Proteobacteria | c__Gammaproteobacteria | o__Chromatiales | f__ | g__ | s__ |
| New.CleanUp.ReferenceOTU104908 | k__Bacteria | p__Proteobacteria | c__Gammaproteobacteria | o__Chromatiales | f__ | g__ | s__ |
| New.CleanUp.ReferenceOTU107873 | k__Bacteria | p__Proteobacteria | c__Gammaproteobacteria | o__Chromatiales | f__ | g__ | s__ |
| New.CleanUp.ReferenceOTU10760  | k__Bacteria | p__Proteobacteria | c__Gammaproteobacteria | o__Chromatiales | f__ | g__ | s__ |

[illegible]

[illegible]

[illegible]

[illegible]

[illegible]

[illegible]

[illegible]













[illegible]

[illegible]









































|                                |             |                   |                |                  |     |     |     |
|--------------------------------|-------------|-------------------|----------------|------------------|-----|-----|-----|
| New.CleanUp.ReferenceOTU91882  | k__Bacteria | p__Bacteroidetes  | c__Bacteroidia | o__Bacteroidales | f__ | g__ | s__ |
| New.CleanUp.ReferenceOTU8878   | k__Bacteria | p__Bacteroidetes  | c__Bacteroidia | o__Bacteroidales | f__ | g__ | s__ |
| New.CleanUp.ReferenceOTU99314  | k__Bacteria | p__Bacteroidetes  | c__Bacteroidia | o__Bacteroidales | f__ | g__ | s__ |
| New.CleanUp.ReferenceOTU96397  | k__Bacteria | p__Bacteroidetes  | c__Bacteroidia | o__Bacteroidales | f__ | g__ | s__ |
| New.CleanUp.ReferenceOTU95527  | k__Bacteria | p__Bacteroidetes  | c__Bacteroidia | o__Bacteroidales | f__ | g__ | s__ |
| New.CleanUp.ReferenceOTU93782  | k__Bacteria | p__Bacteroidetes  | c__Bacteroidia | o__Bacteroidales | f__ | g__ | s__ |
| 581843                         | k__Bacteria | p__Planctomycetes | c__OM190       | o__              | f__ | g__ | s__ |
| New.CleanUp.ReferenceOTU101588 | k__Bacteria | p__Planctomycetes | c__OM190       | o__              | f__ | g__ | s__ |
| New.ReferenceOTU111            | k__Bacteria | p__Planctomycetes | c__OM190       | o__              | f__ | g__ | s__ |
| New.CleanUp.ReferenceOTU101389 | k__Bacteria | p__Planctomycetes | c__OM190       | o__              | f__ | g__ | s__ |
| New.CleanUp.ReferenceOTU100411 | k__Bacteria | p__Planctomycetes | c__OM190       | o__              | f__ | g__ | s__ |
| 811943                         | k__Bacteria | p__Planctomycetes | c__OM190       | o__              | f__ | g__ | s__ |
| New.CleanUp.ReferenceOTU101494 | k__Bacteria | p__Planctomycetes | c__OM190       | o__              | f__ | g__ | s__ |
| New.ReferenceOTU489            | k__Bacteria | p__Planctomycetes | c__OM190       | o__              | f__ | g__ | s__ |
| New.CleanUp.ReferenceOTU109603 | k__Bacteria | p__Planctomycetes | c__OM190       | o__              | f__ | g__ | s__ |
| New.CleanUp.ReferenceOTU114989 | k__Bacteria | p__Planctomycetes | c__OM190       | o__              | f__ | g__ | s__ |
| New.CleanUp.ReferenceOTU110929 | k__Bacteria | p__Planctomycetes | c__OM190       | o__              | f__ | g__ | s__ |
| New.CleanUp.ReferenceOTU120437 | k__Bacteria | p__Planctomycetes | c__OM190       | o__              | f__ | g__ | s__ |
| New.CleanUp.ReferenceOTU11935  | k__Bacteria | p__Planctomycetes | c__OM190       | o__              | f__ | g__ | s__ |
| New.CleanUp.ReferenceOTU118816 | k__Bacteria | p__Planctomycetes | c__OM190       | o__              | f__ | g__ | s__ |
| New.CleanUp.ReferenceOTU119898 | k__Bacteria | p__Planctomycetes | c__OM190       | o__              | f__ | g__ | s__ |
| New.CleanUp.ReferenceOTU130432 | k__Bacteria | p__Planctomycetes | c__OM190       | o__              | f__ | g__ | s__ |
| New.CleanUp.ReferenceOTU129097 | k__Bacteria | p__Planctomycetes | c__OM190       | o__              | f__ | g__ | s__ |
| New.CleanUp.ReferenceOTU132806 | k__Bacteria | p__Planctomycetes | c__OM190       | o__              | f__ | g__ | s__ |
| New.CleanUp.ReferenceOTU132271 | k__Bacteria | p__Planctomycetes | c__OM190       | o__              | f__ | g__ | s__ |
| New.CleanUp.ReferenceOTU136620 | k__Bacteria | p__Planctomycetes | c__OM190       | o__              | f__ | g__ | s__ |
| New.CleanUp.ReferenceOTU143411 | k__Bacteria | p__Planctomycetes | c__OM190       | o__              | f__ | g__ | s__ |
| New.CleanUp.ReferenceOTU141800 | k__Bacteria | p__Planctomycetes | c__OM190       | o__              | f__ | g__ | s__ |
| New.CleanUp.ReferenceOTU14248  | k__Bacteria | p__Planctomycetes | c__OM190       | o__              | f__ | g__ | s__ |
| New.CleanUp.ReferenceOTU143711 | k__Bacteria | p__Planctomycetes | c__OM190       | o__              | f__ | g__ | s__ |
| New.CleanUp.ReferenceOTU138552 | k__Bacteria | p__Planctomycetes | c__OM190       | o__              | f__ | g__ | s__ |
| New.CleanUp.ReferenceOTU143590 | k__Bacteria | p__Planctomycetes | c__OM190       | o__              | f__ | g__ | s__ |
| New.CleanUp.ReferenceOTU146954 | k__Bacteria | p__Planctomycetes | c__OM190       | o__              | f__ | g__ | s__ |
| New.CleanUp.ReferenceOTU149474 | k__Bacteria | p__Planctomycetes | c__OM190       | o__              | f__ | g__ | s__ |
| New.CleanUp.ReferenceOTU146086 | k__Bacteria | p__Planctomycetes | c__OM190       | o__              | f__ | g__ | s__ |
| New.CleanUp.ReferenceOTU152155 | k__Bacteria | p__Planctomycetes | c__OM190       | o__              | f__ | g__ | s__ |
| New.CleanUp.ReferenceOTU150050 | k__Bacteria | p__Planctomycetes | c__OM190       | o__              | f__ | g__ | s__ |

[illegible]

[illegible]

|                                |             |                   |          |                |            |            |     |
|--------------------------------|-------------|-------------------|----------|----------------|------------|------------|-----|
| New.CleanUp.ReferenceOTU86241  | k__Bacteria | p__Planctomycetes | c__OM190 | o__            | f__        | g__        | s__ |
| New.CleanUp.ReferenceOTU86665  | k__Bacteria | p__Planctomycetes | c__OM190 | o__            | f__        | g__        | s__ |
| New.CleanUp.ReferenceOTU90348  | k__Bacteria | p__Planctomycetes | c__OM190 | o__            | f__        | g__        | s__ |
| New.CleanUp.ReferenceOTU87725  | k__Bacteria | p__Planctomycetes | c__OM190 | o__            | f__        | g__        | s__ |
| New.CleanUp.ReferenceOTU94233  | k__Bacteria | p__Planctomycetes | c__OM190 | o__            | f__        | g__        | s__ |
| New.CleanUp.ReferenceOTU93364  | k__Bacteria | p__Planctomycetes | c__OM190 | o__            | f__        | g__        | s__ |
| New.CleanUp.ReferenceOTU97263  | k__Bacteria | p__Planctomycetes | c__OM190 | o__            | f__        | g__        | s__ |
| New.CleanUp.ReferenceOTU96963  | k__Bacteria | p__Planctomycetes | c__OM190 | o__            | f__        | g__        | s__ |
| 2134035                        | k__Bacteria | p__SAR406         | c__AB16  | o__Arctic96B-7 | f__A714017 | g__SGSH944 | s__ |
| 1007856                        | k__Bacteria | p__SAR406         | c__AB16  | o__Arctic96B-7 | f__A714017 | g__SGSH944 | s__ |
| 119137                         | k__Bacteria | p__SAR406         | c__AB16  | o__Arctic96B-7 | f__A714017 | g__SGSH944 | s__ |
| 137397                         | k__Bacteria | p__SAR406         | c__AB16  | o__Arctic96B-7 | f__A714017 | g__SGSH944 | s__ |
| 570167                         | k__Bacteria | p__SAR406         | c__AB16  | o__Arctic96B-7 | f__A714017 | g__SGSH944 | s__ |
| 556451                         | k__Bacteria | p__SAR406         | c__AB16  | o__Arctic96B-7 | f__A714017 | g__SGSH944 | s__ |
| 540723                         | k__Bacteria | p__SAR406         | c__AB16  | o__Arctic96B-7 | f__A714017 | g__SGSH944 | s__ |
| 589064                         | k__Bacteria | p__SAR406         | c__AB16  | o__Arctic96B-7 | f__A714017 | g__SGSH944 | s__ |
| 825733                         | k__Bacteria | p__SAR406         | c__AB16  | o__Arctic96B-7 | f__A714017 | g__SGSH944 | s__ |
| 827289                         | k__Bacteria | p__SAR406         | c__AB16  | o__Arctic96B-7 | f__A714017 | g__SGSH944 | s__ |
| 835910                         | k__Bacteria | p__SAR406         | c__AB16  | o__Arctic96B-7 | f__A714017 | g__SGSH944 | s__ |
| New.CleanUp.ReferenceOTU10081  | k__Bacteria | p__SAR406         | c__AB16  | o__Arctic96B-7 | f__A714017 | g__SGSH944 | s__ |
| New.CleanUp.ReferenceOTU101868 | k__Bacteria | p__SAR406         | c__AB16  | o__Arctic96B-7 | f__A714017 | g__SGSH944 | s__ |
| New.CleanUp.ReferenceOTU103339 | k__Bacteria | p__SAR406         | c__AB16  | o__Arctic96B-7 | f__A714017 | g__SGSH944 | s__ |
| New.CleanUp.ReferenceOTU10459  | k__Bacteria | p__SAR406         | c__AB16  | o__Arctic96B-7 | f__A714017 | g__SGSH944 | s__ |
| New.CleanUp.ReferenceOTU109454 | k__Bacteria | p__SAR406         | c__AB16  | o__Arctic96B-7 | f__A714017 | g__SGSH944 | s__ |
| New.CleanUp.ReferenceOTU110344 | k__Bacteria | p__SAR406         | c__AB16  | o__Arctic96B-7 | f__A714017 | g__SGSH944 | s__ |
| New.CleanUp.ReferenceOTU114180 | k__Bacteria | p__SAR406         | c__AB16  | o__Arctic96B-7 | f__A714017 | g__SGSH944 | s__ |
| New.CleanUp.ReferenceOTU112696 | k__Bacteria | p__SAR406         | c__AB16  | o__Arctic96B-7 | f__A714017 | g__SGSH944 | s__ |
| New.CleanUp.ReferenceOTU111893 | k__Bacteria | p__SAR406         | c__AB16  | o__Arctic96B-7 | f__A714017 | g__SGSH944 | s__ |
| New.CleanUp.ReferenceOTU114113 | k__Bacteria | p__SAR406         | c__AB16  | o__Arctic96B-7 | f__A714017 | g__SGSH944 | s__ |
| New.CleanUp.ReferenceOTU115782 | k__Bacteria | p__SAR406         | c__AB16  | o__Arctic96B-7 | f__A714017 | g__SGSH944 | s__ |
| New.CleanUp.ReferenceOTU113923 | k__Bacteria | p__SAR406         | c__AB16  | o__Arctic96B-7 | f__A714017 | g__SGSH944 | s__ |
| New.CleanUp.ReferenceOTU119368 | k__Bacteria | p__SAR406         | c__AB16  | o__Arctic96B-7 | f__A714017 | g__SGSH944 | s__ |
| New.CleanUp.ReferenceOTU119152 | k__Bacteria | p__SAR406         | c__AB16  | o__Arctic96B-7 | f__A714017 | g__SGSH944 | s__ |
| New.CleanUp.ReferenceOTU122602 | k__Bacteria | p__SAR406         | c__AB16  | o__Arctic96B-7 | f__A714017 | g__SGSH944 | s__ |
| New.CleanUp.ReferenceOTU12087  | k__Bacteria | p__SAR406         | c__AB16  | o__Arctic96B-7 | f__A714017 | g__SGSH944 | s__ |
| New.CleanUp.ReferenceOTU126763 | k__Bacteria | p__SAR406         | c__AB16  | o__Arctic96B-7 | f__A714017 | g__SGSH944 | s__ |
| New.CleanUp.ReferenceOTU128923 | k__Bacteria | p__SAR406         | c__AB16  | o__Arctic96B-7 | f__A714017 | g__SGSH944 | s__ |





|                               |             |                   |                        |                 |            |            |     |
|-------------------------------|-------------|-------------------|------------------------|-----------------|------------|------------|-----|
| New.CleanUp.ReferenceOTU49230 | k__Bacteria | p__SAR406         | c__AB16                | o__Arctic96B-7  | f__A714017 | g__SGSH944 | s__ |
| New.CleanUp.ReferenceOTU50056 | k__Bacteria | p__SAR406         | c__AB16                | o__Arctic96B-7  | f__A714017 | g__SGSH944 | s__ |
| New.CleanUp.ReferenceOTU50927 | k__Bacteria | p__SAR406         | c__AB16                | o__Arctic96B-7  | f__A714017 | g__SGSH944 | s__ |
| New.CleanUp.ReferenceOTU6076  | k__Bacteria | p__SAR406         | c__AB16                | o__Arctic96B-7  | f__A714017 | g__SGSH944 | s__ |
| New.CleanUp.ReferenceOTU59765 | k__Bacteria | p__SAR406         | c__AB16                | o__Arctic96B-7  | f__A714017 | g__SGSH944 | s__ |
| New.CleanUp.ReferenceOTU60591 | k__Bacteria | p__SAR406         | c__AB16                | o__Arctic96B-7  | f__A714017 | g__SGSH944 | s__ |
| New.CleanUp.ReferenceOTU60546 | k__Bacteria | p__SAR406         | c__AB16                | o__Arctic96B-7  | f__A714017 | g__SGSH944 | s__ |
| New.CleanUp.ReferenceOTU68528 | k__Bacteria | p__SAR406         | c__AB16                | o__Arctic96B-7  | f__A714017 | g__SGSH944 | s__ |
| New.CleanUp.ReferenceOTU70384 | k__Bacteria | p__SAR406         | c__AB16                | o__Arctic96B-7  | f__A714017 | g__SGSH944 | s__ |
| New.CleanUp.ReferenceOTU66211 | k__Bacteria | p__SAR406         | c__AB16                | o__Arctic96B-7  | f__A714017 | g__SGSH944 | s__ |
| New.CleanUp.ReferenceOTU65403 | k__Bacteria | p__SAR406         | c__AB16                | o__Arctic96B-7  | f__A714017 | g__SGSH944 | s__ |
| New.CleanUp.ReferenceOTU68571 | k__Bacteria | p__SAR406         | c__AB16                | o__Arctic96B-7  | f__A714017 | g__SGSH944 | s__ |
| New.CleanUp.ReferenceOTU71261 | k__Bacteria | p__SAR406         | c__AB16                | o__Arctic96B-7  | f__A714017 | g__SGSH944 | s__ |
| New.CleanUp.ReferenceOTU82646 | k__Bacteria | p__SAR406         | c__AB16                | o__Arctic96B-7  | f__A714017 | g__SGSH944 | s__ |
| New.CleanUp.ReferenceOTU81585 | k__Bacteria | p__SAR406         | c__AB16                | o__Arctic96B-7  | f__A714017 | g__SGSH944 | s__ |
| New.CleanUp.ReferenceOTU84935 | k__Bacteria | p__SAR406         | c__AB16                | o__Arctic96B-7  | f__A714017 | g__SGSH944 | s__ |
| New.CleanUp.ReferenceOTU91801 | k__Bacteria | p__SAR406         | c__AB16                | o__Arctic96B-7  | f__A714017 | g__SGSH944 | s__ |
| New.CleanUp.ReferenceOTU90687 | k__Bacteria | p__SAR406         | c__AB16                | o__Arctic96B-7  | f__A714017 | g__SGSH944 | s__ |
| New.CleanUp.ReferenceOTU89486 | k__Bacteria | p__SAR406         | c__AB16                | o__Arctic96B-7  | f__A714017 | g__SGSH944 | s__ |
| New.CleanUp.ReferenceOTU89183 | k__Bacteria | p__SAR406         | c__AB16                | o__Arctic96B-7  | f__A714017 | g__SGSH944 | s__ |
| New.CleanUp.ReferenceOTU9232  | k__Bacteria | p__SAR406         | c__AB16                | o__Arctic96B-7  | f__A714017 | g__SGSH944 | s__ |
| New.CleanUp.ReferenceOTU90971 | k__Bacteria | p__SAR406         | c__AB16                | o__Arctic96B-7  | f__A714017 | g__SGSH944 | s__ |
| New.CleanUp.ReferenceOTU88618 | k__Bacteria | p__SAR406         | c__AB16                | o__Arctic96B-7  | f__A714017 | g__SGSH944 | s__ |
| New.CleanUp.ReferenceOTU90034 | k__Bacteria | p__SAR406         | c__AB16                | o__Arctic96B-7  | f__A714017 | g__SGSH944 | s__ |
| New.CleanUp.ReferenceOTU950   | k__Bacteria | p__SAR406         | c__AB16                | o__Arctic96B-7  | f__A714017 | g__SGSH944 | s__ |
| New.CleanUp.ReferenceOTU97607 | k__Bacteria | p__SAR406         | c__AB16                | o__Arctic96B-7  | f__A714017 | g__SGSH944 | s__ |
| New.CleanUp.ReferenceOTU95702 | k__Bacteria | p__SAR406         | c__AB16                | o__Arctic96B-7  | f__A714017 | g__SGSH944 | s__ |
| New.CleanUp.ReferenceOTU99933 | k__Bacteria | p__SAR406         | c__AB16                | o__Arctic96B-7  | f__A714017 | g__SGSH944 | s__ |
| New.CleanUp.ReferenceOTU98622 | k__Bacteria | p__SAR406         | c__AB16                | o__Arctic96B-7  | f__A714017 | g__SGSH944 | s__ |
| New.CleanUp.ReferenceOTU96400 | k__Bacteria | p__SAR406         | c__AB16                | o__Arctic96B-7  | f__A714017 | g__SGSH944 | s__ |
| New.CleanUp.ReferenceOTU98483 | k__Bacteria | p__SAR406         | c__AB16                | o__Arctic96B-7  | f__A714017 | g__SGSH944 | s__ |
| 228868                        | k__Bacteria | p__Proteobacteria | c__Deltaproteobacteria | o__Myxococcales | f__OM27    | g__        | s__ |
| 229993                        | k__Bacteria | p__Proteobacteria | c__Deltaproteobacteria | o__Myxococcales | f__OM27    | g__        | s__ |
| 234197                        | k__Bacteria | p__Proteobacteria | c__Deltaproteobacteria | o__Myxococcales | f__OM27    | g__        | s__ |
| 1107973                       | k__Bacteria | p__Proteobacteria | c__Deltaproteobacteria | o__Myxococcales | f__OM27    | g__        | s__ |
| 2205007                       | k__Bacteria | p__Proteobacteria | c__Deltaproteobacteria | o__Myxococcales | f__OM27    | g__        | s__ |
| 230324                        | k__Bacteria | p__Proteobacteria | c__Deltaproteobacteria | o__Myxococcales | f__OM27    | g__        | s__ |

|                                |            |                  |                       |                |        |     |     |
|--------------------------------|------------|------------------|-----------------------|----------------|--------|-----|-----|
| 246635                         | k_Bacteria | p_Proteobacteria | c_Deltaproteobacteria | o_Myxococcales | f_OM27 | g__ | s__ |
| 230171                         | k_Bacteria | p_Proteobacteria | c_Deltaproteobacteria | o_Myxococcales | f_OM27 | g__ | s__ |
| 1683832                        | k_Bacteria | p_Proteobacteria | c_Deltaproteobacteria | o_Myxococcales | f_OM27 | g__ | s__ |
| 160388                         | k_Bacteria | p_Proteobacteria | c_Deltaproteobacteria | o_Myxococcales | f_OM27 | g__ | s__ |
| 583003                         | k_Bacteria | p_Proteobacteria | c_Deltaproteobacteria | o_Myxococcales | f_OM27 | g__ | s__ |
| 4381902                        | k_Bacteria | p_Proteobacteria | c_Deltaproteobacteria | o_Myxococcales | f_OM27 | g__ | s__ |
| 570846                         | k_Bacteria | p_Proteobacteria | c_Deltaproteobacteria | o_Myxococcales | f_OM27 | g__ | s__ |
| 549977                         | k_Bacteria | p_Proteobacteria | c_Deltaproteobacteria | o_Myxococcales | f_OM27 | g__ | s__ |
| 577706                         | k_Bacteria | p_Proteobacteria | c_Deltaproteobacteria | o_Myxococcales | f_OM27 | g__ | s__ |
| 695253                         | k_Bacteria | p_Proteobacteria | c_Deltaproteobacteria | o_Myxococcales | f_OM27 | g__ | s__ |
| 535675                         | k_Bacteria | p_Proteobacteria | c_Deltaproteobacteria | o_Myxococcales | f_OM27 | g__ | s__ |
| 543569                         | k_Bacteria | p_Proteobacteria | c_Deltaproteobacteria | o_Myxococcales | f_OM27 | g__ | s__ |
| 4339479                        | k_Bacteria | p_Proteobacteria | c_Deltaproteobacteria | o_Myxococcales | f_OM27 | g__ | s__ |
| 548737                         | k_Bacteria | p_Proteobacteria | c_Deltaproteobacteria | o_Myxococcales | f_OM27 | g__ | s__ |
| 590339                         | k_Bacteria | p_Proteobacteria | c_Deltaproteobacteria | o_Myxococcales | f_OM27 | g__ | s__ |
| 648164                         | k_Bacteria | p_Proteobacteria | c_Deltaproteobacteria | o_Myxococcales | f_OM27 | g__ | s__ |
| New.CleanUp.ReferenceOTU102261 | k_Bacteria | p_Proteobacteria | c_Deltaproteobacteria | o_Myxococcales | f_OM27 | g__ | s__ |
| New.ReferenceOTU597            | k_Bacteria | p_Proteobacteria | c_Deltaproteobacteria | o_Myxococcales | f_OM27 | g__ | s__ |
| 816752                         | k_Bacteria | p_Proteobacteria | c_Deltaproteobacteria | o_Myxococcales | f_OM27 | g__ | s__ |
| New.ReferenceOTU381            | k_Bacteria | p_Proteobacteria | c_Deltaproteobacteria | o_Myxococcales | f_OM27 | g__ | s__ |
| New.ReferenceOTU573            | k_Bacteria | p_Proteobacteria | c_Deltaproteobacteria | o_Myxococcales | f_OM27 | g__ | s__ |
| 821649                         | k_Bacteria | p_Proteobacteria | c_Deltaproteobacteria | o_Myxococcales | f_OM27 | g__ | s__ |
| New.ReferenceOTU178            | k_Bacteria | p_Proteobacteria | c_Deltaproteobacteria | o_Myxococcales | f_OM27 | g__ | s__ |
| New.CleanUp.ReferenceOTU10159  | k_Bacteria | p_Proteobacteria | c_Deltaproteobacteria | o_Myxococcales | f_OM27 | g__ | s__ |
| 819433                         | k_Bacteria | p_Proteobacteria | c_Deltaproteobacteria | o_Myxococcales | f_OM27 | g__ | s__ |
| New.CleanUp.ReferenceOTU10168  | k_Bacteria | p_Proteobacteria | c_Deltaproteobacteria | o_Myxococcales | f_OM27 | g__ | s__ |
| New.CleanUp.ReferenceOTU101337 | k_Bacteria | p_Proteobacteria | c_Deltaproteobacteria | o_Myxococcales | f_OM27 | g__ | s__ |
| New.CleanUp.ReferenceOTU105617 | k_Bacteria | p_Proteobacteria | c_Deltaproteobacteria | o_Myxococcales | f_OM27 | g__ | s__ |
| New.CleanUp.ReferenceOTU104238 | k_Bacteria | p_Proteobacteria | c_Deltaproteobacteria | o_Myxococcales | f_OM27 | g__ | s__ |
| New.CleanUp.ReferenceOTU105459 | k_Bacteria | p_Proteobacteria | c_Deltaproteobacteria | o_Myxococcales | f_OM27 | g__ | s__ |
| New.CleanUp.ReferenceOTU114186 | k_Bacteria | p_Proteobacteria | c_Deltaproteobacteria | o_Myxococcales | f_OM27 | g__ | s__ |
| New.CleanUp.ReferenceOTU110369 | k_Bacteria | p_Proteobacteria | c_Deltaproteobacteria | o_Myxococcales | f_OM27 | g__ | s__ |
| New.CleanUp.ReferenceOTU115808 | k_Bacteria | p_Proteobacteria | c_Deltaproteobacteria | o_Myxococcales | f_OM27 | g__ | s__ |
| New.CleanUp.ReferenceOTU112707 | k_Bacteria | p_Proteobacteria | c_Deltaproteobacteria | o_Myxococcales | f_OM27 | g__ | s__ |
| New.CleanUp.ReferenceOTU114045 | k_Bacteria | p_Proteobacteria | c_Deltaproteobacteria | o_Myxococcales | f_OM27 | g__ | s__ |
| New.CleanUp.ReferenceOTU113004 | k_Bacteria | p_Proteobacteria | c_Deltaproteobacteria | o_Myxococcales | f_OM27 | g__ | s__ |
| New.CleanUp.ReferenceOTU11196  | k_Bacteria | p_Proteobacteria | c_Deltaproteobacteria | o_Myxococcales | f_OM27 | g__ | s__ |













|                                |             |                   |                        |                     |         |     |     |
|--------------------------------|-------------|-------------------|------------------------|---------------------|---------|-----|-----|
| New.CleanUp.ReferenceOTU95072  | k__Bacteria | p__Proteobacteria | c__Deltaproteobacteria | o__Myxococcales     | f__OM27 | g__ | s__ |
| New.CleanUp.ReferenceOTU99373  | k__Bacteria | p__Proteobacteria | c__Deltaproteobacteria | o__Myxococcales     | f__OM27 | g__ | s__ |
| New.CleanUp.ReferenceOTU97446  | k__Bacteria | p__Proteobacteria | c__Deltaproteobacteria | o__Myxococcales     | f__OM27 | g__ | s__ |
| 122966                         | k__Bacteria | p__Bacteroidetes  | c__Flavobacteriia      | o__Flavobacteriales | f__NS9  | g__ | s__ |
| 101620                         | k__Bacteria | p__Bacteroidetes  | c__Flavobacteriia      | o__Flavobacteriales | f__NS9  | g__ | s__ |
| 165490                         | k__Bacteria | p__Bacteroidetes  | c__Flavobacteriia      | o__Flavobacteriales | f__NS9  | g__ | s__ |
| 305081                         | k__Bacteria | p__Bacteroidetes  | c__Flavobacteriia      | o__Flavobacteriales | f__NS9  | g__ | s__ |
| 232612                         | k__Bacteria | p__Bacteroidetes  | c__Flavobacteriia      | o__Flavobacteriales | f__NS9  | g__ | s__ |
| 118269                         | k__Bacteria | p__Bacteroidetes  | c__Flavobacteriia      | o__Flavobacteriales | f__NS9  | g__ | s__ |
| 2138725                        | k__Bacteria | p__Bacteroidetes  | c__Flavobacteriia      | o__Flavobacteriales | f__NS9  | g__ | s__ |
| 1107076                        | k__Bacteria | p__Bacteroidetes  | c__Flavobacteriia      | o__Flavobacteriales | f__NS9  | g__ | s__ |
| 583037                         | k__Bacteria | p__Bacteroidetes  | c__Flavobacteriia      | o__Flavobacteriales | f__NS9  | g__ | s__ |
| 590564                         | k__Bacteria | p__Bacteroidetes  | c__Flavobacteriia      | o__Flavobacteriales | f__NS9  | g__ | s__ |
| 620696                         | k__Bacteria | p__Bacteroidetes  | c__Flavobacteriia      | o__Flavobacteriales | f__NS9  | g__ | s__ |
| 666573                         | k__Bacteria | p__Bacteroidetes  | c__Flavobacteriia      | o__Flavobacteriales | f__NS9  | g__ | s__ |
| 563050                         | k__Bacteria | p__Bacteroidetes  | c__Flavobacteriia      | o__Flavobacteriales | f__NS9  | g__ | s__ |
| 831425                         | k__Bacteria | p__Bacteroidetes  | c__Flavobacteriia      | o__Flavobacteriales | f__NS9  | g__ | s__ |
| New.CleanUp.ReferenceOTU100228 | k__Bacteria | p__Bacteroidetes  | c__Flavobacteriia      | o__Flavobacteriales | f__NS9  | g__ | s__ |
| 827769                         | k__Bacteria | p__Bacteroidetes  | c__Flavobacteriia      | o__Flavobacteriales | f__NS9  | g__ | s__ |
| 826017                         | k__Bacteria | p__Bacteroidetes  | c__Flavobacteriia      | o__Flavobacteriales | f__NS9  | g__ | s__ |
| New.CleanUp.ReferenceOTU100980 | k__Bacteria | p__Bacteroidetes  | c__Flavobacteriia      | o__Flavobacteriales | f__NS9  | g__ | s__ |
| New.CleanUp.ReferenceOTU101647 | k__Bacteria | p__Bacteroidetes  | c__Flavobacteriia      | o__Flavobacteriales | f__NS9  | g__ | s__ |
| New.ReferenceOTU158            | k__Bacteria | p__Bacteroidetes  | c__Flavobacteriia      | o__Flavobacteriales | f__NS9  | g__ | s__ |
| 834389                         | k__Bacteria | p__Bacteroidetes  | c__Flavobacteriia      | o__Flavobacteriales | f__NS9  | g__ | s__ |
| New.CleanUp.ReferenceOTU102373 | k__Bacteria | p__Bacteroidetes  | c__Flavobacteriia      | o__Flavobacteriales | f__NS9  | g__ | s__ |
| New.CleanUp.ReferenceOTU100033 | k__Bacteria | p__Bacteroidetes  | c__Flavobacteriia      | o__Flavobacteriales | f__NS9  | g__ | s__ |
| New.CleanUp.ReferenceOTU101948 | k__Bacteria | p__Bacteroidetes  | c__Flavobacteriia      | o__Flavobacteriales | f__NS9  | g__ | s__ |
| New.CleanUp.ReferenceOTU102663 | k__Bacteria | p__Bacteroidetes  | c__Flavobacteriia      | o__Flavobacteriales | f__NS9  | g__ | s__ |
| New.CleanUp.ReferenceOTU104041 | k__Bacteria | p__Bacteroidetes  | c__Flavobacteriia      | o__Flavobacteriales | f__NS9  | g__ | s__ |
| New.CleanUp.ReferenceOTU107184 | k__Bacteria | p__Bacteroidetes  | c__Flavobacteriia      | o__Flavobacteriales | f__NS9  | g__ | s__ |
| New.CleanUp.ReferenceOTU106151 | k__Bacteria | p__Bacteroidetes  | c__Flavobacteriia      | o__Flavobacteriales | f__NS9  | g__ | s__ |
| New.CleanUp.ReferenceOTU105576 | k__Bacteria | p__Bacteroidetes  | c__Flavobacteriia      | o__Flavobacteriales | f__NS9  | g__ | s__ |
| New.CleanUp.ReferenceOTU107131 | k__Bacteria | p__Bacteroidetes  | c__Flavobacteriia      | o__Flavobacteriales | f__NS9  | g__ | s__ |
| New.CleanUp.ReferenceOTU108450 | k__Bacteria | p__Bacteroidetes  | c__Flavobacteriia      | o__Flavobacteriales | f__NS9  | g__ | s__ |
| New.CleanUp.ReferenceOTU104518 | k__Bacteria | p__Bacteroidetes  | c__Flavobacteriia      | o__Flavobacteriales | f__NS9  | g__ | s__ |
| New.CleanUp.ReferenceOTU113731 | k__Bacteria | p__Bacteroidetes  | c__Flavobacteriia      | o__Flavobacteriales | f__NS9  | g__ | s__ |
| New.CleanUp.ReferenceOTU110140 | k__Bacteria | p__Bacteroidetes  | c__Flavobacteriia      | o__Flavobacteriales | f__NS9  | g__ | s__ |



























[illegible]

[illegible]















[illegible]















[illegible]

[illegible]

[illegible]

[illegible]

[illegible]

|                                |             |                   |                    |               |     |     |     |
|--------------------------------|-------------|-------------------|--------------------|---------------|-----|-----|-----|
| New.CleanUp.ReferenceOTU219035 | k__Bacteria | p__Actinobacteria | c__Thermoleophilia | o__Gaiellales | f__ | g__ | s__ |
| New.CleanUp.ReferenceOTU29465  | k__Bacteria | p__Actinobacteria | c__Thermoleophilia | o__Gaiellales | f__ | g__ | s__ |
| New.CleanUp.ReferenceOTU35498  | k__Bacteria | p__Actinobacteria | c__Thermoleophilia | o__Gaiellales | f__ | g__ | s__ |
| New.CleanUp.ReferenceOTU4093   | k__Bacteria | p__Actinobacteria | c__Thermoleophilia | o__Gaiellales | f__ | g__ | s__ |
| New.CleanUp.ReferenceOTU48966  | k__Bacteria | p__Actinobacteria | c__Thermoleophilia | o__Gaiellales | f__ | g__ | s__ |
| New.CleanUp.ReferenceOTU47040  | k__Bacteria | p__Actinobacteria | c__Thermoleophilia | o__Gaiellales | f__ | g__ | s__ |
| New.CleanUp.ReferenceOTU55179  | k__Bacteria | p__Actinobacteria | c__Thermoleophilia | o__Gaiellales | f__ | g__ | s__ |
| New.CleanUp.ReferenceOTU52142  | k__Bacteria | p__Actinobacteria | c__Thermoleophilia | o__Gaiellales | f__ | g__ | s__ |
| New.CleanUp.ReferenceOTU53050  | k__Bacteria | p__Actinobacteria | c__Thermoleophilia | o__Gaiellales | f__ | g__ | s__ |
| New.CleanUp.ReferenceOTU58534  | k__Bacteria | p__Actinobacteria | c__Thermoleophilia | o__Gaiellales | f__ | g__ | s__ |
| New.CleanUp.ReferenceOTU64119  | k__Bacteria | p__Actinobacteria | c__Thermoleophilia | o__Gaiellales | f__ | g__ | s__ |
| New.CleanUp.ReferenceOTU72270  | k__Bacteria | p__Actinobacteria | c__Thermoleophilia | o__Gaiellales | f__ | g__ | s__ |
| New.CleanUp.ReferenceOTU75365  | k__Bacteria | p__Actinobacteria | c__Thermoleophilia | o__Gaiellales | f__ | g__ | s__ |
| New.CleanUp.ReferenceOTU8378   | k__Bacteria | p__Actinobacteria | c__Thermoleophilia | o__Gaiellales | f__ | g__ | s__ |
| New.CleanUp.ReferenceOTU91669  | k__Bacteria | p__Actinobacteria | c__Thermoleophilia | o__Gaiellales | f__ | g__ | s__ |
| New.CleanUp.ReferenceOTU90640  | k__Bacteria | p__Actinobacteria | c__Thermoleophilia | o__Gaiellales | f__ | g__ | s__ |
| New.CleanUp.ReferenceOTU9277   | k__Bacteria | p__Actinobacteria | c__Thermoleophilia | o__Gaiellales | f__ | g__ | s__ |
| New.CleanUp.ReferenceOTU93936  | k__Bacteria | p__Actinobacteria | c__Thermoleophilia | o__Gaiellales | f__ | g__ | s__ |
| 101670                         | k__Bacteria | p__Chloroflexi    | c__SAR202          | o__           | f__ | g__ | s__ |
| 318624                         | k__Bacteria | p__Chloroflexi    | c__SAR202          | o__           | f__ | g__ | s__ |
| 105649                         | k__Bacteria | p__Chloroflexi    | c__SAR202          | o__           | f__ | g__ | s__ |
| 1112570                        | k__Bacteria | p__Chloroflexi    | c__SAR202          | o__           | f__ | g__ | s__ |
| 2642683                        | k__Bacteria | p__Chloroflexi    | c__SAR202          | o__           | f__ | g__ | s__ |
| 573377                         | k__Bacteria | p__Chloroflexi    | c__SAR202          | o__           | f__ | g__ | s__ |
| 570432                         | k__Bacteria | p__Chloroflexi    | c__SAR202          | o__           | f__ | g__ | s__ |
| 561898                         | k__Bacteria | p__Chloroflexi    | c__SAR202          | o__           | f__ | g__ | s__ |
| 548109                         | k__Bacteria | p__Chloroflexi    | c__SAR202          | o__           | f__ | g__ | s__ |
| New.CleanUp.ReferenceOTU100180 | k__Bacteria | p__Chloroflexi    | c__SAR202          | o__           | f__ | g__ | s__ |
| New.ReferenceOTU120            | k__Bacteria | p__Chloroflexi    | c__SAR202          | o__           | f__ | g__ | s__ |
| 830429                         | k__Bacteria | p__Chloroflexi    | c__SAR202          | o__           | f__ | g__ | s__ |
| 833556                         | k__Bacteria | p__Chloroflexi    | c__SAR202          | o__           | f__ | g__ | s__ |
| 837714                         | k__Bacteria | p__Chloroflexi    | c__SAR202          | o__           | f__ | g__ | s__ |
| New.CleanUp.ReferenceOTU103504 | k__Bacteria | p__Chloroflexi    | c__SAR202          | o__           | f__ | g__ | s__ |
| New.CleanUp.ReferenceOTU109270 | k__Bacteria | p__Chloroflexi    | c__SAR202          | o__           | f__ | g__ | s__ |
| New.CleanUp.ReferenceOTU103950 | k__Bacteria | p__Chloroflexi    | c__SAR202          | o__           | f__ | g__ | s__ |
| New.CleanUp.ReferenceOTU110854 | k__Bacteria | p__Chloroflexi    | c__SAR202          | o__           | f__ | g__ | s__ |
| New.CleanUp.ReferenceOTU121352 | k__Bacteria | p__Chloroflexi    | c__SAR202          | o__           | f__ | g__ | s__ |

|                                |            |               |          |     |     |     |     |
|--------------------------------|------------|---------------|----------|-----|-----|-----|-----|
| New.CleanUp.ReferenceOTU128579 | k_Bacteria | p_Chloroflexi | c_SAR202 | o__ | f__ | g__ | s__ |
| New.CleanUp.ReferenceOTU12743  | k_Bacteria | p_Chloroflexi | c_SAR202 | o__ | f__ | g__ | s__ |
| New.CleanUp.ReferenceOTU131145 | k_Bacteria | p_Chloroflexi | c_SAR202 | o__ | f__ | g__ | s__ |
| New.CleanUp.ReferenceOTU145249 | k_Bacteria | p_Chloroflexi | c_SAR202 | o__ | f__ | g__ | s__ |
| New.CleanUp.ReferenceOTU138186 | k_Bacteria | p_Chloroflexi | c_SAR202 | o__ | f__ | g__ | s__ |
| New.CleanUp.ReferenceOTU144679 | k_Bacteria | p_Chloroflexi | c_SAR202 | o__ | f__ | g__ | s__ |
| New.CleanUp.ReferenceOTU150595 | k_Bacteria | p_Chloroflexi | c_SAR202 | o__ | f__ | g__ | s__ |
| New.CleanUp.ReferenceOTU146815 | k_Bacteria | p_Chloroflexi | c_SAR202 | o__ | f__ | g__ | s__ |
| New.CleanUp.ReferenceOTU156465 | k_Bacteria | p_Chloroflexi | c_SAR202 | o__ | f__ | g__ | s__ |
| New.CleanUp.ReferenceOTU156936 | k_Bacteria | p_Chloroflexi | c_SAR202 | o__ | f__ | g__ | s__ |
| New.CleanUp.ReferenceOTU157335 | k_Bacteria | p_Chloroflexi | c_SAR202 | o__ | f__ | g__ | s__ |
| New.CleanUp.ReferenceOTU157999 | k_Bacteria | p_Chloroflexi | c_SAR202 | o__ | f__ | g__ | s__ |
| New.CleanUp.ReferenceOTU173459 | k_Bacteria | p_Chloroflexi | c_SAR202 | o__ | f__ | g__ | s__ |
| New.CleanUp.ReferenceOTU173820 | k_Bacteria | p_Chloroflexi | c_SAR202 | o__ | f__ | g__ | s__ |
| New.CleanUp.ReferenceOTU168137 | k_Bacteria | p_Chloroflexi | c_SAR202 | o__ | f__ | g__ | s__ |
| New.CleanUp.ReferenceOTU181690 | k_Bacteria | p_Chloroflexi | c_SAR202 | o__ | f__ | g__ | s__ |
| New.CleanUp.ReferenceOTU182084 | k_Bacteria | p_Chloroflexi | c_SAR202 | o__ | f__ | g__ | s__ |
| New.CleanUp.ReferenceOTU184931 | k_Bacteria | p_Chloroflexi | c_SAR202 | o__ | f__ | g__ | s__ |
| New.CleanUp.ReferenceOTU186030 | k_Bacteria | p_Chloroflexi | c_SAR202 | o__ | f__ | g__ | s__ |
| New.CleanUp.ReferenceOTU194259 | k_Bacteria | p_Chloroflexi | c_SAR202 | o__ | f__ | g__ | s__ |
| New.CleanUp.ReferenceOTU200108 | k_Bacteria | p_Chloroflexi | c_SAR202 | o__ | f__ | g__ | s__ |
| New.CleanUp.ReferenceOTU203998 | k_Bacteria | p_Chloroflexi | c_SAR202 | o__ | f__ | g__ | s__ |
| New.CleanUp.ReferenceOTU203281 | k_Bacteria | p_Chloroflexi | c_SAR202 | o__ | f__ | g__ | s__ |
| New.CleanUp.ReferenceOTU208929 | k_Bacteria | p_Chloroflexi | c_SAR202 | o__ | f__ | g__ | s__ |
| New.CleanUp.ReferenceOTU206324 | k_Bacteria | p_Chloroflexi | c_SAR202 | o__ | f__ | g__ | s__ |
| New.CleanUp.ReferenceOTU210119 | k_Bacteria | p_Chloroflexi | c_SAR202 | o__ | f__ | g__ | s__ |
| New.CleanUp.ReferenceOTU215842 | k_Bacteria | p_Chloroflexi | c_SAR202 | o__ | f__ | g__ | s__ |
| New.CleanUp.ReferenceOTU25587  | k_Bacteria | p_Chloroflexi | c_SAR202 | o__ | f__ | g__ | s__ |
| New.CleanUp.ReferenceOTU219142 | k_Bacteria | p_Chloroflexi | c_SAR202 | o__ | f__ | g__ | s__ |
| New.CleanUp.ReferenceOTU27896  | k_Bacteria | p_Chloroflexi | c_SAR202 | o__ | f__ | g__ | s__ |
| New.CleanUp.ReferenceOTU28154  | k_Bacteria | p_Chloroflexi | c_SAR202 | o__ | f__ | g__ | s__ |
| New.CleanUp.ReferenceOTU38708  | k_Bacteria | p_Chloroflexi | c_SAR202 | o__ | f__ | g__ | s__ |
| New.CleanUp.ReferenceOTU42896  | k_Bacteria | p_Chloroflexi | c_SAR202 | o__ | f__ | g__ | s__ |
| New.CleanUp.ReferenceOTU47678  | k_Bacteria | p_Chloroflexi | c_SAR202 | o__ | f__ | g__ | s__ |
| New.CleanUp.ReferenceOTU52572  | k_Bacteria | p_Chloroflexi | c_SAR202 | o__ | f__ | g__ | s__ |
| New.CleanUp.ReferenceOTU50580  | k_Bacteria | p_Chloroflexi | c_SAR202 | o__ | f__ | g__ | s__ |
| New.CleanUp.ReferenceOTU53325  | k_Bacteria | p_Chloroflexi | c_SAR202 | o__ | f__ | g__ | s__ |

|                                |            |                 |                 |                    |                   |     |     |
|--------------------------------|------------|-----------------|-----------------|--------------------|-------------------|-----|-----|
| New.CleanUp.ReferenceOTU59942  | k_Bacteria | p_Chloroflexi   | c_SAR202        |                    | f__               | g__ | s__ |
| New.CleanUp.ReferenceOTU59925  | k_Bacteria | p_Chloroflexi   | c_SAR202        |                    | f__               | g__ | s__ |
| New.CleanUp.ReferenceOTU64129  | k_Bacteria | p_Chloroflexi   | c_SAR202        |                    | f__               | g__ | s__ |
| New.CleanUp.ReferenceOTU70009  | k_Bacteria | p_Chloroflexi   | c_SAR202        |                    | f__               | g__ | s__ |
| New.CleanUp.ReferenceOTU69013  | k_Bacteria | p_Chloroflexi   | c_SAR202        |                    | f__               | g__ | s__ |
| New.CleanUp.ReferenceOTU70600  | k_Bacteria | p_Chloroflexi   | c_SAR202        |                    | f__               | g__ | s__ |
| New.CleanUp.ReferenceOTU70266  | k_Bacteria | p_Chloroflexi   | c_SAR202        |                    | f__               | g__ | s__ |
| New.CleanUp.ReferenceOTU73476  | k_Bacteria | p_Chloroflexi   | c_SAR202        |                    | f__               | g__ | s__ |
| New.CleanUp.ReferenceOTU7574   | k_Bacteria | p_Chloroflexi   | c_SAR202        |                    | f__               | g__ | s__ |
| New.CleanUp.ReferenceOTU7175   | k_Bacteria | p_Chloroflexi   | c_SAR202        |                    | f__               | g__ | s__ |
| New.CleanUp.ReferenceOTU78002  | k_Bacteria | p_Chloroflexi   | c_SAR202        |                    | f__               | g__ | s__ |
| New.CleanUp.ReferenceOTU74439  | k_Bacteria | p_Chloroflexi   | c_SAR202        |                    | f__               | g__ | s__ |
| New.CleanUp.ReferenceOTU84058  | k_Bacteria | p_Chloroflexi   | c_SAR202        |                    | f__               | g__ | s__ |
| New.CleanUp.ReferenceOTU82766  | k_Bacteria | p_Chloroflexi   | c_SAR202        |                    | f__               | g__ | s__ |
| New.CleanUp.ReferenceOTU89730  | k_Bacteria | p_Chloroflexi   | c_SAR202        |                    | f__               | g__ | s__ |
| New.CleanUp.ReferenceOTU9190   | k_Bacteria | p_Chloroflexi   | c_SAR202        |                    | f__               | g__ | s__ |
| New.CleanUp.ReferenceOTU91195  | k_Bacteria | p_Chloroflexi   | c_SAR202        |                    | f__               | g__ | s__ |
| New.CleanUp.ReferenceOTU85949  | k_Bacteria | p_Chloroflexi   | c_SAR202        |                    | f__               | g__ | s__ |
| New.CleanUp.ReferenceOTU96847  | k_Bacteria | p_Chloroflexi   | c_SAR202        |                    | f__               | g__ | s__ |
| New.CleanUp.ReferenceOTU97226  | k_Bacteria | p_Chloroflexi   | c_SAR202        |                    | f__               | g__ | s__ |
| 268113                         | k_Bacteria | p_Bacteroidetes | c_[Rhodothermi] | o_[Rhodothermales] | f_Rhodothermaceae | g__ | s__ |
| 235984                         | k_Bacteria | p_Bacteroidetes | c_[Rhodothermi] | o_[Rhodothermales] | f_Rhodothermaceae | g__ | s__ |
| 2648                           | k_Bacteria | p_Bacteroidetes | c_[Rhodothermi] | o_[Rhodothermales] | f_Rhodothermaceae | g__ | s__ |
| 571736                         | k_Bacteria | p_Bacteroidetes | c_[Rhodothermi] | o_[Rhodothermales] | f_Rhodothermaceae | g__ | s__ |
| 536800                         | k_Bacteria | p_Bacteroidetes | c_[Rhodothermi] | o_[Rhodothermales] | f_Rhodothermaceae | g__ | s__ |
| New.CleanUp.ReferenceOTU100787 | k_Bacteria | p_Bacteroidetes | c_[Rhodothermi] | o_[Rhodothermales] | f_Rhodothermaceae | g__ | s__ |
| New.ReferenceOTU56             | k_Bacteria | p_Bacteroidetes | c_[Rhodothermi] | o_[Rhodothermales] | f_Rhodothermaceae | g__ | s__ |
| New.CleanUp.ReferenceOTU10850  | k_Bacteria | p_Bacteroidetes | c_[Rhodothermi] | o_[Rhodothermales] | f_Rhodothermaceae | g__ | s__ |
| New.CleanUp.ReferenceOTU106713 | k_Bacteria | p_Bacteroidetes | c_[Rhodothermi] | o_[Rhodothermales] | f_Rhodothermaceae | g__ | s__ |
| New.CleanUp.ReferenceOTU105368 | k_Bacteria | p_Bacteroidetes | c_[Rhodothermi] | o_[Rhodothermales] | f_Rhodothermaceae | g__ | s__ |
| New.CleanUp.ReferenceOTU105742 | k_Bacteria | p_Bacteroidetes | c_[Rhodothermi] | o_[Rhodothermales] | f_Rhodothermaceae | g__ | s__ |
| New.CleanUp.ReferenceOTU115825 | k_Bacteria | p_Bacteroidetes | c_[Rhodothermi] | o_[Rhodothermales] | f_Rhodothermaceae | g__ | s__ |
| New.CleanUp.ReferenceOTU113708 | k_Bacteria | p_Bacteroidetes | c_[Rhodothermi] | o_[Rhodothermales] | f_Rhodothermaceae | g__ | s__ |
| New.CleanUp.ReferenceOTU115807 | k_Bacteria | p_Bacteroidetes | c_[Rhodothermi] | o_[Rhodothermales] | f_Rhodothermaceae | g__ | s__ |
| New.CleanUp.ReferenceOTU109871 | k_Bacteria | p_Bacteroidetes | c_[Rhodothermi] | o_[Rhodothermales] | f_Rhodothermaceae | g__ | s__ |
| New.CleanUp.ReferenceOTU116969 | k_Bacteria | p_Bacteroidetes | c_[Rhodothermi] | o_[Rhodothermales] | f_Rhodothermaceae | g__ | s__ |
| New.CleanUp.ReferenceOTU116809 | k_Bacteria | p_Bacteroidetes | c_[Rhodothermi] | o_[Rhodothermales] | f_Rhodothermaceae | g__ | s__ |



[illegible]

[illegible]

[illegible]

[illegible]

[illegible]

[illegible]

[illegible]

|                                |             |                   |                        |                |                 |           |     |
|--------------------------------|-------------|-------------------|------------------------|----------------|-----------------|-----------|-----|
| New.CleanUp.ReferenceOTU156985 | k__Bacteria | p__Proteobacteria | c__Gammaproteobacteria | o__Vibrionales | f__Vibrionaceae | g__Vibrio | s__ |
| New.CleanUp.ReferenceOTU207070 | k__Bacteria | p__Proteobacteria | c__Gammaproteobacteria | o__Vibrionales | f__Vibrionaceae | g__Vibrio | s__ |
| New.CleanUp.ReferenceOTU23645  | k__Bacteria | p__Proteobacteria | c__Gammaproteobacteria | o__Vibrionales | f__Vibrionaceae | g__Vibrio | s__ |
| New.CleanUp.ReferenceOTU39855  | k__Bacteria | p__Proteobacteria | c__Gammaproteobacteria | o__Vibrionales | f__Vibrionaceae | g__Vibrio | s__ |
| New.CleanUp.ReferenceOTU85010  | k__Bacteria | p__Proteobacteria | c__Gammaproteobacteria | o__Vibrionales | f__Vibrionaceae | g__Vibrio | s__ |
| New.CleanUp.ReferenceOTU9698   | k__Bacteria | p__Proteobacteria | c__Gammaproteobacteria | o__Vibrionales | f__Vibrionaceae | g__Vibrio | s__ |
| 1110857                        | k__Bacteria | p__Planctomycetes | c__OM190               | o__agg27       | f__             | g__       | s__ |
| 242961                         | k__Bacteria | p__Planctomycetes | c__OM190               | o__agg27       | f__             | g__       | s__ |
| 270621                         | k__Bacteria | p__Planctomycetes | c__OM190               | o__agg27       | f__             | g__       | s__ |
| 242474                         | k__Bacteria | p__Planctomycetes | c__OM190               | o__agg27       | f__             | g__       | s__ |
| 2910                           | k__Bacteria | p__Planctomycetes | c__OM190               | o__agg27       | f__             | g__       | s__ |
| 4336113                        | k__Bacteria | p__Planctomycetes | c__OM190               | o__agg27       | f__             | g__       | s__ |
| 564055                         | k__Bacteria | p__Planctomycetes | c__OM190               | o__agg27       | f__             | g__       | s__ |
| New.ReferenceOTU101            | k__Bacteria | p__Planctomycetes | c__OM190               | o__agg27       | f__             | g__       | s__ |
| 725876                         | k__Bacteria | p__Planctomycetes | c__OM190               | o__agg27       | f__             | g__       | s__ |
| New.ReferenceOTU55             | k__Bacteria | p__Planctomycetes | c__OM190               | o__agg27       | f__             | g__       | s__ |
| New.ReferenceOTU97             | k__Bacteria | p__Planctomycetes | c__OM190               | o__agg27       | f__             | g__       | s__ |
| New.ReferenceOTU482            | k__Bacteria | p__Planctomycetes | c__OM190               | o__agg27       | f__             | g__       | s__ |
| New.CleanUp.ReferenceOTU10629  | k__Bacteria | p__Planctomycetes | c__OM190               | o__agg27       | f__             | g__       | s__ |
| New.CleanUp.ReferenceOTU113424 | k__Bacteria | p__Planctomycetes | c__OM190               | o__agg27       | f__             | g__       | s__ |
| New.CleanUp.ReferenceOTU11496  | k__Bacteria | p__Planctomycetes | c__OM190               | o__agg27       | f__             | g__       | s__ |
| New.CleanUp.ReferenceOTU113589 | k__Bacteria | p__Planctomycetes | c__OM190               | o__agg27       | f__             | g__       | s__ |
| New.CleanUp.ReferenceOTU111469 | k__Bacteria | p__Planctomycetes | c__OM190               | o__agg27       | f__             | g__       | s__ |
| New.CleanUp.ReferenceOTU118185 | k__Bacteria | p__Planctomycetes | c__OM190               | o__agg27       | f__             | g__       | s__ |
| New.CleanUp.ReferenceOTU118197 | k__Bacteria | p__Planctomycetes | c__OM190               | o__agg27       | f__             | g__       | s__ |
| New.CleanUp.ReferenceOTU119701 | k__Bacteria | p__Planctomycetes | c__OM190               | o__agg27       | f__             | g__       | s__ |
| New.CleanUp.ReferenceOTU123039 | k__Bacteria | p__Planctomycetes | c__OM190               | o__agg27       | f__             | g__       | s__ |
| New.CleanUp.ReferenceOTU118076 | k__Bacteria | p__Planctomycetes | c__OM190               | o__agg27       | f__             | g__       | s__ |
| New.CleanUp.ReferenceOTU127164 | k__Bacteria | p__Planctomycetes | c__OM190               | o__agg27       | f__             | g__       | s__ |
| New.CleanUp.ReferenceOTU12883  | k__Bacteria | p__Planctomycetes | c__OM190               | o__agg27       | f__             | g__       | s__ |
| New.CleanUp.ReferenceOTU135134 | k__Bacteria | p__Planctomycetes | c__OM190               | o__agg27       | f__             | g__       | s__ |
| New.CleanUp.ReferenceOTU131025 | k__Bacteria | p__Planctomycetes | c__OM190               | o__agg27       | f__             | g__       | s__ |
| New.CleanUp.ReferenceOTU134810 | k__Bacteria | p__Planctomycetes | c__OM190               | o__agg27       | f__             | g__       | s__ |
| New.CleanUp.ReferenceOTU139444 | k__Bacteria | p__Planctomycetes | c__OM190               | o__agg27       | f__             | g__       | s__ |
| New.CleanUp.ReferenceOTU140941 | k__Bacteria | p__Planctomycetes | c__OM190               | o__agg27       | f__             | g__       | s__ |
| New.CleanUp.ReferenceOTU143556 | k__Bacteria | p__Planctomycetes | c__OM190               | o__agg27       | f__             | g__       | s__ |
| New.CleanUp.ReferenceOTU154927 | k__Bacteria | p__Planctomycetes | c__OM190               | o__agg27       | f__             | g__       | s__ |



[illegible]

|                                |            |                  |                       |                 |              |    |    |
|--------------------------------|------------|------------------|-----------------------|-----------------|--------------|----|----|
| New.CleanUp.ReferenceOTU7015   | k_Bacteria | p_Planctomycetes | c_OM190               | o_agg27         | f_           | g_ | s_ |
| New.CleanUp.ReferenceOTU65458  | k_Bacteria | p_Planctomycetes | c_OM190               | o_agg27         | f_           | g_ | s_ |
| New.CleanUp.ReferenceOTU65937  | k_Bacteria | p_Planctomycetes | c_OM190               | o_agg27         | f_           | g_ | s_ |
| New.CleanUp.ReferenceOTU6708   | k_Bacteria | p_Planctomycetes | c_OM190               | o_agg27         | f_           | g_ | s_ |
| New.CleanUp.ReferenceOTU7783   | k_Bacteria | p_Planctomycetes | c_OM190               | o_agg27         | f_           | g_ | s_ |
| New.CleanUp.ReferenceOTU72825  | k_Bacteria | p_Planctomycetes | c_OM190               | o_agg27         | f_           | g_ | s_ |
| New.CleanUp.ReferenceOTU74522  | k_Bacteria | p_Planctomycetes | c_OM190               | o_agg27         | f_           | g_ | s_ |
| New.CleanUp.ReferenceOTU77405  | k_Bacteria | p_Planctomycetes | c_OM190               | o_agg27         | f_           | g_ | s_ |
| New.CleanUp.ReferenceOTU78187  | k_Bacteria | p_Planctomycetes | c_OM190               | o_agg27         | f_           | g_ | s_ |
| New.CleanUp.ReferenceOTU80346  | k_Bacteria | p_Planctomycetes | c_OM190               | o_agg27         | f_           | g_ | s_ |
| New.CleanUp.ReferenceOTU80261  | k_Bacteria | p_Planctomycetes | c_OM190               | o_agg27         | f_           | g_ | s_ |
| New.CleanUp.ReferenceOTU91509  | k_Bacteria | p_Planctomycetes | c_OM190               | o_agg27         | f_           | g_ | s_ |
| New.CleanUp.ReferenceOTU89737  | k_Bacteria | p_Planctomycetes | c_OM190               | o_agg27         | f_           | g_ | s_ |
| New.CleanUp.ReferenceOTU8739   | k_Bacteria | p_Planctomycetes | c_OM190               | o_agg27         | f_           | g_ | s_ |
| 229420                         | k_Bacteria | p_Proteobacteria | c_Alphaproteobacteria | o_Rickettsiales | f_AEGEAN_112 | g_ | s_ |
| 344179                         | k_Bacteria | p_Proteobacteria | c_Alphaproteobacteria | o_Rickettsiales | f_AEGEAN_112 | g_ | s_ |
| 305656                         | k_Bacteria | p_Proteobacteria | c_Alphaproteobacteria | o_Rickettsiales | f_AEGEAN_112 | g_ | s_ |
| 234095                         | k_Bacteria | p_Proteobacteria | c_Alphaproteobacteria | o_Rickettsiales | f_AEGEAN_112 | g_ | s_ |
| 353181                         | k_Bacteria | p_Proteobacteria | c_Alphaproteobacteria | o_Rickettsiales | f_AEGEAN_112 | g_ | s_ |
| 4356184                        | k_Bacteria | p_Proteobacteria | c_Alphaproteobacteria | o_Rickettsiales | f_AEGEAN_112 | g_ | s_ |
| New.CleanUp.ReferenceOTU100069 | k_Bacteria | p_Proteobacteria | c_Alphaproteobacteria | o_Rickettsiales | f_AEGEAN_112 | g_ | s_ |
| New.CleanUp.ReferenceOTU100374 | k_Bacteria | p_Proteobacteria | c_Alphaproteobacteria | o_Rickettsiales | f_AEGEAN_112 | g_ | s_ |
| New.CleanUp.ReferenceOTU10869  | k_Bacteria | p_Proteobacteria | c_Alphaproteobacteria | o_Rickettsiales | f_AEGEAN_112 | g_ | s_ |
| New.CleanUp.ReferenceOTU10969  | k_Bacteria | p_Proteobacteria | c_Alphaproteobacteria | o_Rickettsiales | f_AEGEAN_112 | g_ | s_ |
| New.CleanUp.ReferenceOTU105527 | k_Bacteria | p_Proteobacteria | c_Alphaproteobacteria | o_Rickettsiales | f_AEGEAN_112 | g_ | s_ |
| New.CleanUp.ReferenceOTU103551 | k_Bacteria | p_Proteobacteria | c_Alphaproteobacteria | o_Rickettsiales | f_AEGEAN_112 | g_ | s_ |
| New.CleanUp.ReferenceOTU11005  | k_Bacteria | p_Proteobacteria | c_Alphaproteobacteria | o_Rickettsiales | f_AEGEAN_112 | g_ | s_ |
| New.CleanUp.ReferenceOTU115856 | k_Bacteria | p_Proteobacteria | c_Alphaproteobacteria | o_Rickettsiales | f_AEGEAN_112 | g_ | s_ |
| New.CleanUp.ReferenceOTU113084 | k_Bacteria | p_Proteobacteria | c_Alphaproteobacteria | o_Rickettsiales | f_AEGEAN_112 | g_ | s_ |
| New.CleanUp.ReferenceOTU116689 | k_Bacteria | p_Proteobacteria | c_Alphaproteobacteria | o_Rickettsiales | f_AEGEAN_112 | g_ | s_ |
| New.CleanUp.ReferenceOTU123729 | k_Bacteria | p_Proteobacteria | c_Alphaproteobacteria | o_Rickettsiales | f_AEGEAN_112 | g_ | s_ |
| New.CleanUp.ReferenceOTU118295 | k_Bacteria | p_Proteobacteria | c_Alphaproteobacteria | o_Rickettsiales | f_AEGEAN_112 | g_ | s_ |
| New.CleanUp.ReferenceOTU123566 | k_Bacteria | p_Proteobacteria | c_Alphaproteobacteria | o_Rickettsiales | f_AEGEAN_112 | g_ | s_ |
| New.CleanUp.ReferenceOTU127556 | k_Bacteria | p_Proteobacteria | c_Alphaproteobacteria | o_Rickettsiales | f_AEGEAN_112 | g_ | s_ |
| New.CleanUp.ReferenceOTU127305 | k_Bacteria | p_Proteobacteria | c_Alphaproteobacteria | o_Rickettsiales | f_AEGEAN_112 | g_ | s_ |
| New.CleanUp.ReferenceOTU124593 | k_Bacteria | p_Proteobacteria | c_Alphaproteobacteria | o_Rickettsiales | f_AEGEAN_112 | g_ | s_ |
| New.CleanUp.ReferenceOTU134241 | k_Bacteria | p_Proteobacteria | c_Alphaproteobacteria | o_Rickettsiales | f_AEGEAN_112 | g_ | s_ |

[illegible]

[illegible]

[illegible]

[illegible]

[illegible]

[illegible]



[illegible]

[illegible]

[illegible]

|                                |             |                    |                   |                |     |     |     |
|--------------------------------|-------------|--------------------|-------------------|----------------|-----|-----|-----|
| New.CleanUp.ReferenceOTU41917  | k__Bacteria | p__Planctomycetes  | c__OM190          | o__CL500-15    | f__ | g__ | s__ |
| New.CleanUp.ReferenceOTU5626   | k__Bacteria | p__Planctomycetes  | c__OM190          | o__CL500-15    | f__ | g__ | s__ |
| New.CleanUp.ReferenceOTU49938  | k__Bacteria | p__Planctomycetes  | c__OM190          | o__CL500-15    | f__ | g__ | s__ |
| New.CleanUp.ReferenceOTU50499  | k__Bacteria | p__Planctomycetes  | c__OM190          | o__CL500-15    | f__ | g__ | s__ |
| New.CleanUp.ReferenceOTU49256  | k__Bacteria | p__Planctomycetes  | c__OM190          | o__CL500-15    | f__ | g__ | s__ |
| New.CleanUp.ReferenceOTU63083  | k__Bacteria | p__Planctomycetes  | c__OM190          | o__CL500-15    | f__ | g__ | s__ |
| New.CleanUp.ReferenceOTU57908  | k__Bacteria | p__Planctomycetes  | c__OM190          | o__CL500-15    | f__ | g__ | s__ |
| New.CleanUp.ReferenceOTU57459  | k__Bacteria | p__Planctomycetes  | c__OM190          | o__CL500-15    | f__ | g__ | s__ |
| New.CleanUp.ReferenceOTU62560  | k__Bacteria | p__Planctomycetes  | c__OM190          | o__CL500-15    | f__ | g__ | s__ |
| New.CleanUp.ReferenceOTU65598  | k__Bacteria | p__Planctomycetes  | c__OM190          | o__CL500-15    | f__ | g__ | s__ |
| New.CleanUp.ReferenceOTU68779  | k__Bacteria | p__Planctomycetes  | c__OM190          | o__CL500-15    | f__ | g__ | s__ |
| New.CleanUp.ReferenceOTU69366  | k__Bacteria | p__Planctomycetes  | c__OM190          | o__CL500-15    | f__ | g__ | s__ |
| New.CleanUp.ReferenceOTU69968  | k__Bacteria | p__Planctomycetes  | c__OM190          | o__CL500-15    | f__ | g__ | s__ |
| New.CleanUp.ReferenceOTU64648  | k__Bacteria | p__Planctomycetes  | c__OM190          | o__CL500-15    | f__ | g__ | s__ |
| New.CleanUp.ReferenceOTU72193  | k__Bacteria | p__Planctomycetes  | c__OM190          | o__CL500-15    | f__ | g__ | s__ |
| New.CleanUp.ReferenceOTU73220  | k__Bacteria | p__Planctomycetes  | c__OM190          | o__CL500-15    | f__ | g__ | s__ |
| New.CleanUp.ReferenceOTU89577  | k__Bacteria | p__Planctomycetes  | c__OM190          | o__CL500-15    | f__ | g__ | s__ |
| New.CleanUp.ReferenceOTU9425   | k__Bacteria | p__Planctomycetes  | c__OM190          | o__CL500-15    | f__ | g__ | s__ |
| New.CleanUp.ReferenceOTU99887  | k__Bacteria | p__Planctomycetes  | c__OM190          | o__CL500-15    | f__ | g__ | s__ |
| New.CleanUp.ReferenceOTU94380  | k__Bacteria | p__Planctomycetes  | c__OM190          | o__CL500-15    | f__ | g__ | s__ |
| 158564                         | k__Bacteria | p__Verrucomicrobia | c__[Pedosphaerae] | o__Arctic97B-4 | f__ | g__ | s__ |
| 32593                          | k__Bacteria | p__Verrucomicrobia | c__[Pedosphaerae] | o__Arctic97B-4 | f__ | g__ | s__ |
| 1130212                        | k__Bacteria | p__Verrucomicrobia | c__[Pedosphaerae] | o__Arctic97B-4 | f__ | g__ | s__ |
| 4259472                        | k__Bacteria | p__Verrucomicrobia | c__[Pedosphaerae] | o__Arctic97B-4 | f__ | g__ | s__ |
| 355710                         | k__Bacteria | p__Verrucomicrobia | c__[Pedosphaerae] | o__Arctic97B-4 | f__ | g__ | s__ |
| 835852                         | k__Bacteria | p__Verrucomicrobia | c__[Pedosphaerae] | o__Arctic97B-4 | f__ | g__ | s__ |
| New.CleanUp.ReferenceOTU100601 | k__Bacteria | p__Verrucomicrobia | c__[Pedosphaerae] | o__Arctic97B-4 | f__ | g__ | s__ |
| 817250                         | k__Bacteria | p__Verrucomicrobia | c__[Pedosphaerae] | o__Arctic97B-4 | f__ | g__ | s__ |
| New.CleanUp.ReferenceOTU106036 | k__Bacteria | p__Verrucomicrobia | c__[Pedosphaerae] | o__Arctic97B-4 | f__ | g__ | s__ |
| New.CleanUp.ReferenceOTU108935 | k__Bacteria | p__Verrucomicrobia | c__[Pedosphaerae] | o__Arctic97B-4 | f__ | g__ | s__ |
| New.CleanUp.ReferenceOTU109193 | k__Bacteria | p__Verrucomicrobia | c__[Pedosphaerae] | o__Arctic97B-4 | f__ | g__ | s__ |
| New.CleanUp.ReferenceOTU103360 | k__Bacteria | p__Verrucomicrobia | c__[Pedosphaerae] | o__Arctic97B-4 | f__ | g__ | s__ |
| New.CleanUp.ReferenceOTU111842 | k__Bacteria | p__Verrucomicrobia | c__[Pedosphaerae] | o__Arctic97B-4 | f__ | g__ | s__ |
| New.CleanUp.ReferenceOTU114645 | k__Bacteria | p__Verrucomicrobia | c__[Pedosphaerae] | o__Arctic97B-4 | f__ | g__ | s__ |
| New.CleanUp.ReferenceOTU115975 | k__Bacteria | p__Verrucomicrobia | c__[Pedosphaerae] | o__Arctic97B-4 | f__ | g__ | s__ |
| New.CleanUp.ReferenceOTU118882 | k__Bacteria | p__Verrucomicrobia | c__[Pedosphaerae] | o__Arctic97B-4 | f__ | g__ | s__ |
| New.CleanUp.ReferenceOTU120283 | k__Bacteria | p__Verrucomicrobia | c__[Pedosphaerae] | o__Arctic97B-4 | f__ | g__ | s__ |

[illegible]

[illegible]

[illegible]

[illegible]



[illegible]

[illegible]

|                               |             |               |               |                  |                    |     |     |
|-------------------------------|-------------|---------------|---------------|------------------|--------------------|-----|-----|
| 523934                        | k__Bacteria | p__Firmicutes | c__Clostridia | o__Clostridiales | f__Lachnospiraceae | g__ | s__ |
| 523064                        | k__Bacteria | p__Firmicutes | c__Clostridia | o__Clostridiales | f__Lachnospiraceae | g__ | s__ |
| 515279                        | k__Bacteria | p__Firmicutes | c__Clostridia | o__Clostridiales | f__Lachnospiraceae | g__ | s__ |
| 352852                        | k__Bacteria | p__Firmicutes | c__Clostridia | o__Clostridiales | f__Lachnospiraceae | g__ | s__ |
| 363264                        | k__Bacteria | p__Firmicutes | c__Clostridia | o__Clostridiales | f__Lachnospiraceae | g__ | s__ |
| 355905                        | k__Bacteria | p__Firmicutes | c__Clostridia | o__Clostridiales | f__Lachnospiraceae | g__ | s__ |
| 587669                        | k__Bacteria | p__Firmicutes | c__Clostridia | o__Clostridiales | f__Lachnospiraceae | g__ | s__ |
| 355697                        | k__Bacteria | p__Firmicutes | c__Clostridia | o__Clostridiales | f__Lachnospiraceae | g__ | s__ |
| 369526                        | k__Bacteria | p__Firmicutes | c__Clostridia | o__Clostridiales | f__Lachnospiraceae | g__ | s__ |
| 571178                        | k__Bacteria | p__Firmicutes | c__Clostridia | o__Clostridiales | f__Lachnospiraceae | g__ | s__ |
| 528596                        | k__Bacteria | p__Firmicutes | c__Clostridia | o__Clostridiales | f__Lachnospiraceae | g__ | s__ |
| 3849736                       | k__Bacteria | p__Firmicutes | c__Clostridia | o__Clostridiales | f__Lachnospiraceae | g__ | s__ |
| 573379                        | k__Bacteria | p__Firmicutes | c__Clostridia | o__Clostridiales | f__Lachnospiraceae | g__ | s__ |
| 554338                        | k__Bacteria | p__Firmicutes | c__Clostridia | o__Clostridiales | f__Lachnospiraceae | g__ | s__ |
| 369182                        | k__Bacteria | p__Firmicutes | c__Clostridia | o__Clostridiales | f__Lachnospiraceae | g__ | s__ |
| 548503                        | k__Bacteria | p__Firmicutes | c__Clostridia | o__Clostridiales | f__Lachnospiraceae | g__ | s__ |
| 358798                        | k__Bacteria | p__Firmicutes | c__Clostridia | o__Clostridiales | f__Lachnospiraceae | g__ | s__ |
| 578649                        | k__Bacteria | p__Firmicutes | c__Clostridia | o__Clostridiales | f__Lachnospiraceae | g__ | s__ |
| 554303                        | k__Bacteria | p__Firmicutes | c__Clostridia | o__Clostridiales | f__Lachnospiraceae | g__ | s__ |
| 561171                        | k__Bacteria | p__Firmicutes | c__Clostridia | o__Clostridiales | f__Lachnospiraceae | g__ | s__ |
| 361845                        | k__Bacteria | p__Firmicutes | c__Clostridia | o__Clostridiales | f__Lachnospiraceae | g__ | s__ |
| 575261                        | k__Bacteria | p__Firmicutes | c__Clostridia | o__Clostridiales | f__Lachnospiraceae | g__ | s__ |
| 588429                        | k__Bacteria | p__Firmicutes | c__Clostridia | o__Clostridiales | f__Lachnospiraceae | g__ | s__ |
| 370809                        | k__Bacteria | p__Firmicutes | c__Clostridia | o__Clostridiales | f__Lachnospiraceae | g__ | s__ |
| 547913                        | k__Bacteria | p__Firmicutes | c__Clostridia | o__Clostridiales | f__Lachnospiraceae | g__ | s__ |
| 352733                        | k__Bacteria | p__Firmicutes | c__Clostridia | o__Clostridiales | f__Lachnospiraceae | g__ | s__ |
| 562038                        | k__Bacteria | p__Firmicutes | c__Clostridia | o__Clostridiales | f__Lachnospiraceae | g__ | s__ |
| 360329                        | k__Bacteria | p__Firmicutes | c__Clostridia | o__Clostridiales | f__Lachnospiraceae | g__ | s__ |
| 355771                        | k__Bacteria | p__Firmicutes | c__Clostridia | o__Clostridiales | f__Lachnospiraceae | g__ | s__ |
| 4310448                       | k__Bacteria | p__Firmicutes | c__Clostridia | o__Clostridiales | f__Lachnospiraceae | g__ | s__ |
| 4430497                       | k__Bacteria | p__Firmicutes | c__Clostridia | o__Clostridiales | f__Lachnospiraceae | g__ | s__ |
| 4468959                       | k__Bacteria | p__Firmicutes | c__Clostridia | o__Clostridiales | f__Lachnospiraceae | g__ | s__ |
| 450047                        | k__Bacteria | p__Firmicutes | c__Clostridia | o__Clostridiales | f__Lachnospiraceae | g__ | s__ |
| 363400                        | k__Bacteria | p__Firmicutes | c__Clostridia | o__Clostridiales | f__Lachnospiraceae | g__ | s__ |
| 753891                        | k__Bacteria | p__Firmicutes | c__Clostridia | o__Clostridiales | f__Lachnospiraceae | g__ | s__ |
| 739826                        | k__Bacteria | p__Firmicutes | c__Clostridia | o__Clostridiales | f__Lachnospiraceae | g__ | s__ |
| New.CleanUp.ReferenceOTU10224 | k__Bacteria | p__Firmicutes | c__Clostridia | o__Clostridiales | f__Lachnospiraceae | g__ | s__ |





|                                |             |               |               |                  |                    |     |     |
|--------------------------------|-------------|---------------|---------------|------------------|--------------------|-----|-----|
| New.CleanUp.ReferenceOTU77091  | k__Bacteria | p__Firmicutes | c__Clostridia | o__Clostridiales | f__Lachnospiraceae | g__ | s__ |
| New.CleanUp.ReferenceOTU83585  | k__Bacteria | p__Firmicutes | c__Clostridia | o__Clostridiales | f__Lachnospiraceae | g__ | s__ |
| New.CleanUp.ReferenceOTU84910  | k__Bacteria | p__Firmicutes | c__Clostridia | o__Clostridiales | f__Lachnospiraceae | g__ | s__ |
| New.CleanUp.ReferenceOTU79903  | k__Bacteria | p__Firmicutes | c__Clostridia | o__Clostridiales | f__Lachnospiraceae | g__ | s__ |
| New.CleanUp.ReferenceOTU81467  | k__Bacteria | p__Firmicutes | c__Clostridia | o__Clostridiales | f__Lachnospiraceae | g__ | s__ |
| New.CleanUp.ReferenceOTU86364  | k__Bacteria | p__Firmicutes | c__Clostridia | o__Clostridiales | f__Lachnospiraceae | g__ | s__ |
| New.CleanUp.ReferenceOTU90284  | k__Bacteria | p__Firmicutes | c__Clostridia | o__Clostridiales | f__Lachnospiraceae | g__ | s__ |
| New.CleanUp.ReferenceOTU90567  | k__Bacteria | p__Firmicutes | c__Clostridia | o__Clostridiales | f__Lachnospiraceae | g__ | s__ |
| New.CleanUp.ReferenceOTU97142  | k__Bacteria | p__Firmicutes | c__Clostridia | o__Clostridiales | f__Lachnospiraceae | g__ | s__ |
| New.CleanUp.ReferenceOTU98548  | k__Bacteria | p__Firmicutes | c__Clostridia | o__Clostridiales | f__Lachnospiraceae | g__ | s__ |
| New.CleanUp.ReferenceOTU93237  | k__Bacteria | p__Firmicutes | c__Clostridia | o__Clostridiales | f__Lachnospiraceae | g__ | s__ |
| 149592                         | k__Bacteria | p__GN02       | c__BD1-5      | o__              | f__                | g__ | s__ |
| 2609994                        | k__Bacteria | p__GN02       | c__BD1-5      | o__              | f__                | g__ | s__ |
| 255765                         | k__Bacteria | p__GN02       | c__BD1-5      | o__              | f__                | g__ | s__ |
| 11188                          | k__Bacteria | p__GN02       | c__BD1-5      | o__              | f__                | g__ | s__ |
| 2726907                        | k__Bacteria | p__GN02       | c__BD1-5      | o__              | f__                | g__ | s__ |
| 537633                         | k__Bacteria | p__GN02       | c__BD1-5      | o__              | f__                | g__ | s__ |
| 562277                         | k__Bacteria | p__GN02       | c__BD1-5      | o__              | f__                | g__ | s__ |
| 534444                         | k__Bacteria | p__GN02       | c__BD1-5      | o__              | f__                | g__ | s__ |
| 4404199                        | k__Bacteria | p__GN02       | c__BD1-5      | o__              | f__                | g__ | s__ |
| 572572                         | k__Bacteria | p__GN02       | c__BD1-5      | o__              | f__                | g__ | s__ |
| 4399127                        | k__Bacteria | p__GN02       | c__BD1-5      | o__              | f__                | g__ | s__ |
| 583073                         | k__Bacteria | p__GN02       | c__BD1-5      | o__              | f__                | g__ | s__ |
| 594103                         | k__Bacteria | p__GN02       | c__BD1-5      | o__              | f__                | g__ | s__ |
| 562805                         | k__Bacteria | p__GN02       | c__BD1-5      | o__              | f__                | g__ | s__ |
| 562734                         | k__Bacteria | p__GN02       | c__BD1-5      | o__              | f__                | g__ | s__ |
| 4457085                        | k__Bacteria | p__GN02       | c__BD1-5      | o__              | f__                | g__ | s__ |
| 853457                         | k__Bacteria | p__GN02       | c__BD1-5      | o__              | f__                | g__ | s__ |
| New.CleanUp.ReferenceOTU10228  | k__Bacteria | p__GN02       | c__BD1-5      | o__              | f__                | g__ | s__ |
| New.CleanUp.ReferenceOTU106217 | k__Bacteria | p__GN02       | c__BD1-5      | o__              | f__                | g__ | s__ |
| New.CleanUp.ReferenceOTU108562 | k__Bacteria | p__GN02       | c__BD1-5      | o__              | f__                | g__ | s__ |
| New.CleanUp.ReferenceOTU102778 | k__Bacteria | p__GN02       | c__BD1-5      | o__              | f__                | g__ | s__ |
| New.CleanUp.ReferenceOTU103967 | k__Bacteria | p__GN02       | c__BD1-5      | o__              | f__                | g__ | s__ |
| New.CleanUp.ReferenceOTU105794 | k__Bacteria | p__GN02       | c__BD1-5      | o__              | f__                | g__ | s__ |
| New.CleanUp.ReferenceOTU111595 | k__Bacteria | p__GN02       | c__BD1-5      | o__              | f__                | g__ | s__ |
| New.CleanUp.ReferenceOTU114665 | k__Bacteria | p__GN02       | c__BD1-5      | o__              | f__                | g__ | s__ |
| New.CleanUp.ReferenceOTU114652 | k__Bacteria | p__GN02       | c__BD1-5      | o__              | f__                | g__ | s__ |

|                                |             |         |          |     |     |     |     |
|--------------------------------|-------------|---------|----------|-----|-----|-----|-----|
| New.CleanUp.ReferenceOTU114724 | k__Bacteria | p__GN02 | c__BD1-5 | o__ | f__ | g__ | s__ |
| New.CleanUp.ReferenceOTU123637 | k__Bacteria | p__GN02 | c__BD1-5 | o__ | f__ | g__ | s__ |
| New.CleanUp.ReferenceOTU118720 | k__Bacteria | p__GN02 | c__BD1-5 | o__ | f__ | g__ | s__ |
| New.CleanUp.ReferenceOTU11954  | k__Bacteria | p__GN02 | c__BD1-5 | o__ | f__ | g__ | s__ |
| New.CleanUp.ReferenceOTU11992  | k__Bacteria | p__GN02 | c__BD1-5 | o__ | f__ | g__ | s__ |
| New.CleanUp.ReferenceOTU129641 | k__Bacteria | p__GN02 | c__BD1-5 | o__ | f__ | g__ | s__ |
| New.CleanUp.ReferenceOTU128399 | k__Bacteria | p__GN02 | c__BD1-5 | o__ | f__ | g__ | s__ |
| New.CleanUp.ReferenceOTU13983  | k__Bacteria | p__GN02 | c__BD1-5 | o__ | f__ | g__ | s__ |
| New.CleanUp.ReferenceOTU146575 | k__Bacteria | p__GN02 | c__BD1-5 | o__ | f__ | g__ | s__ |
| New.CleanUp.ReferenceOTU146329 | k__Bacteria | p__GN02 | c__BD1-5 | o__ | f__ | g__ | s__ |
| New.CleanUp.ReferenceOTU146463 | k__Bacteria | p__GN02 | c__BD1-5 | o__ | f__ | g__ | s__ |
| New.CleanUp.ReferenceOTU146697 | k__Bacteria | p__GN02 | c__BD1-5 | o__ | f__ | g__ | s__ |
| New.CleanUp.ReferenceOTU145418 | k__Bacteria | p__GN02 | c__BD1-5 | o__ | f__ | g__ | s__ |
| New.CleanUp.ReferenceOTU153146 | k__Bacteria | p__GN02 | c__BD1-5 | o__ | f__ | g__ | s__ |
| New.CleanUp.ReferenceOTU165723 | k__Bacteria | p__GN02 | c__BD1-5 | o__ | f__ | g__ | s__ |
| New.CleanUp.ReferenceOTU160356 | k__Bacteria | p__GN02 | c__BD1-5 | o__ | f__ | g__ | s__ |
| New.CleanUp.ReferenceOTU162420 | k__Bacteria | p__GN02 | c__BD1-5 | o__ | f__ | g__ | s__ |
| New.CleanUp.ReferenceOTU16417  | k__Bacteria | p__GN02 | c__BD1-5 | o__ | f__ | g__ | s__ |
| New.CleanUp.ReferenceOTU167278 | k__Bacteria | p__GN02 | c__BD1-5 | o__ | f__ | g__ | s__ |
| New.CleanUp.ReferenceOTU16733  | k__Bacteria | p__GN02 | c__BD1-5 | o__ | f__ | g__ | s__ |
| New.CleanUp.ReferenceOTU172570 | k__Bacteria | p__GN02 | c__BD1-5 | o__ | f__ | g__ | s__ |
| New.CleanUp.ReferenceOTU180176 | k__Bacteria | p__GN02 | c__BD1-5 | o__ | f__ | g__ | s__ |
| New.CleanUp.ReferenceOTU179472 | k__Bacteria | p__GN02 | c__BD1-5 | o__ | f__ | g__ | s__ |
| New.CleanUp.ReferenceOTU175650 | k__Bacteria | p__GN02 | c__BD1-5 | o__ | f__ | g__ | s__ |
| New.CleanUp.ReferenceOTU17649  | k__Bacteria | p__GN02 | c__BD1-5 | o__ | f__ | g__ | s__ |
| New.CleanUp.ReferenceOTU175785 | k__Bacteria | p__GN02 | c__BD1-5 | o__ | f__ | g__ | s__ |
| New.CleanUp.ReferenceOTU186277 | k__Bacteria | p__GN02 | c__BD1-5 | o__ | f__ | g__ | s__ |
| New.CleanUp.ReferenceOTU186087 | k__Bacteria | p__GN02 | c__BD1-5 | o__ | f__ | g__ | s__ |
| New.CleanUp.ReferenceOTU18673  | k__Bacteria | p__GN02 | c__BD1-5 | o__ | f__ | g__ | s__ |
| New.CleanUp.ReferenceOTU194409 | k__Bacteria | p__GN02 | c__BD1-5 | o__ | f__ | g__ | s__ |
| New.CleanUp.ReferenceOTU196978 | k__Bacteria | p__GN02 | c__BD1-5 | o__ | f__ | g__ | s__ |
| New.CleanUp.ReferenceOTU199842 | k__Bacteria | p__GN02 | c__BD1-5 | o__ | f__ | g__ | s__ |
| New.CleanUp.ReferenceOTU202038 | k__Bacteria | p__GN02 | c__BD1-5 | o__ | f__ | g__ | s__ |
| New.CleanUp.ReferenceOTU208502 | k__Bacteria | p__GN02 | c__BD1-5 | o__ | f__ | g__ | s__ |
| New.CleanUp.ReferenceOTU209473 | k__Bacteria | p__GN02 | c__BD1-5 | o__ | f__ | g__ | s__ |
| New.CleanUp.ReferenceOTU210276 | k__Bacteria | p__GN02 | c__BD1-5 | o__ | f__ | g__ | s__ |
| New.CleanUp.ReferenceOTU214080 | k__Bacteria | p__GN02 | c__BD1-5 | o__ | f__ | g__ | s__ |





[illegible]

[illegible]

|                                |            |                  |                       |                 |                  |     |     |
|--------------------------------|------------|------------------|-----------------------|-----------------|------------------|-----|-----|
| New.CleanUp.ReferenceOTU188013 | k_Bacteria | p_Cyanobacteria  | c_Chloroplast         | o_Chlorophyta   | f__              | g__ | s__ |
| New.CleanUp.ReferenceOTU193851 | k_Bacteria | p_Cyanobacteria  | c_Chloroplast         | o_Chlorophyta   | f__              | g__ | s__ |
| New.CleanUp.ReferenceOTU200113 | k_Bacteria | p_Cyanobacteria  | c_Chloroplast         | o_Chlorophyta   | f__              | g__ | s__ |
| New.CleanUp.ReferenceOTU19824  | k_Bacteria | p_Cyanobacteria  | c_Chloroplast         | o_Chlorophyta   | f__              | g__ | s__ |
| New.CleanUp.ReferenceOTU216785 | k_Bacteria | p_Cyanobacteria  | c_Chloroplast         | o_Chlorophyta   | f__              | g__ | s__ |
| New.CleanUp.ReferenceOTU216646 | k_Bacteria | p_Cyanobacteria  | c_Chloroplast         | o_Chlorophyta   | f__              | g__ | s__ |
| New.CleanUp.ReferenceOTU215737 | k_Bacteria | p_Cyanobacteria  | c_Chloroplast         | o_Chlorophyta   | f__              | g__ | s__ |
| New.CleanUp.ReferenceOTU218036 | k_Bacteria | p_Cyanobacteria  | c_Chloroplast         | o_Chlorophyta   | f__              | g__ | s__ |
| New.CleanUp.ReferenceOTU39359  | k_Bacteria | p_Cyanobacteria  | c_Chloroplast         | o_Chlorophyta   | f__              | g__ | s__ |
| New.CleanUp.ReferenceOTU37130  | k_Bacteria | p_Cyanobacteria  | c_Chloroplast         | o_Chlorophyta   | f__              | g__ | s__ |
| New.CleanUp.ReferenceOTU48183  | k_Bacteria | p_Cyanobacteria  | c_Chloroplast         | o_Chlorophyta   | f__              | g__ | s__ |
| New.CleanUp.ReferenceOTU4718   | k_Bacteria | p_Cyanobacteria  | c_Chloroplast         | o_Chlorophyta   | f__              | g__ | s__ |
| New.CleanUp.ReferenceOTU544    | k_Bacteria | p_Cyanobacteria  | c_Chloroplast         | o_Chlorophyta   | f__              | g__ | s__ |
| New.CleanUp.ReferenceOTU53429  | k_Bacteria | p_Cyanobacteria  | c_Chloroplast         | o_Chlorophyta   | f__              | g__ | s__ |
| New.CleanUp.ReferenceOTU61769  | k_Bacteria | p_Cyanobacteria  | c_Chloroplast         | o_Chlorophyta   | f__              | g__ | s__ |
| New.CleanUp.ReferenceOTU64314  | k_Bacteria | p_Cyanobacteria  | c_Chloroplast         | o_Chlorophyta   | f__              | g__ | s__ |
| New.CleanUp.ReferenceOTU68093  | k_Bacteria | p_Cyanobacteria  | c_Chloroplast         | o_Chlorophyta   | f__              | g__ | s__ |
| New.CleanUp.ReferenceOTU73536  | k_Bacteria | p_Cyanobacteria  | c_Chloroplast         | o_Chlorophyta   | f__              | g__ | s__ |
| New.CleanUp.ReferenceOTU76929  | k_Bacteria | p_Cyanobacteria  | c_Chloroplast         | o_Chlorophyta   | f__              | g__ | s__ |
| New.CleanUp.ReferenceOTU81618  | k_Bacteria | p_Cyanobacteria  | c_Chloroplast         | o_Chlorophyta   | f__              | g__ | s__ |
| New.CleanUp.ReferenceOTU91705  | k_Bacteria | p_Cyanobacteria  | c_Chloroplast         | o_Chlorophyta   | f__              | g__ | s__ |
| 254127                         | k_Bacteria | p_Proteobacteria | c_Alphaproteobacteria | o_Rickettsiales | f_Rickettsiaceae | g__ | s__ |
| 201204                         | k_Bacteria | p_Proteobacteria | c_Alphaproteobacteria | o_Rickettsiales | f_Rickettsiaceae | g__ | s__ |
| 325735                         | k_Bacteria | p_Proteobacteria | c_Alphaproteobacteria | o_Rickettsiales | f_Rickettsiaceae | g__ | s__ |
| 231758                         | k_Bacteria | p_Proteobacteria | c_Alphaproteobacteria | o_Rickettsiales | f_Rickettsiaceae | g__ | s__ |
| 139511                         | k_Bacteria | p_Proteobacteria | c_Alphaproteobacteria | o_Rickettsiales | f_Rickettsiaceae | g__ | s__ |
| 1919149                        | k_Bacteria | p_Proteobacteria | c_Alphaproteobacteria | o_Rickettsiales | f_Rickettsiaceae | g__ | s__ |
| 593993                         | k_Bacteria | p_Proteobacteria | c_Alphaproteobacteria | o_Rickettsiales | f_Rickettsiaceae | g__ | s__ |
| 4469172                        | k_Bacteria | p_Proteobacteria | c_Alphaproteobacteria | o_Rickettsiales | f_Rickettsiaceae | g__ | s__ |
| 566196                         | k_Bacteria | p_Proteobacteria | c_Alphaproteobacteria | o_Rickettsiales | f_Rickettsiaceae | g__ | s__ |
| 4388411                        | k_Bacteria | p_Proteobacteria | c_Alphaproteobacteria | o_Rickettsiales | f_Rickettsiaceae | g__ | s__ |
| 647393                         | k_Bacteria | p_Proteobacteria | c_Alphaproteobacteria | o_Rickettsiales | f_Rickettsiaceae | g__ | s__ |
| 355833                         | k_Bacteria | p_Proteobacteria | c_Alphaproteobacteria | o_Rickettsiales | f_Rickettsiaceae | g__ | s__ |
| New.ReferenceOTU253            | k_Bacteria | p_Proteobacteria | c_Alphaproteobacteria | o_Rickettsiales | f_Rickettsiaceae | g__ | s__ |
| New.CleanUp.ReferenceOTU110381 | k_Bacteria | p_Proteobacteria | c_Alphaproteobacteria | o_Rickettsiales | f_Rickettsiaceae | g__ | s__ |
| New.CleanUp.ReferenceOTU113391 | k_Bacteria | p_Proteobacteria | c_Alphaproteobacteria | o_Rickettsiales | f_Rickettsiaceae | g__ | s__ |
| New.CleanUp.ReferenceOTU110497 | k_Bacteria | p_Proteobacteria | c_Alphaproteobacteria | o_Rickettsiales | f_Rickettsiaceae | g__ | s__ |

[illegible]

[illegible]

[illegible]

[illegible]

[illegible]



[illegible]

[illegible]

[illegible]

[illegible]

[illegible]

[illegible]

[illegible]

[illegible]



[illegible]

[illegible]

[illegible]

[illegible]
