# Supplementary material
Source: publisher figshare collection journal article supplement (https://karger.figshare.com/articles/dataset/_/6715517)
Supplement: Supplementary file 3 [file 1]

**Table S2. An overview of the sequencing and quality of reads from each sample.**

| Sampling date | Depth   | <sup>1</sup> Raw reads | <sup>2</sup> Unjoined reads | <sup>3</sup> High quality reads | <sup>4</sup> Low quality reads |
|---------------|---------|------------------------|-----------------------------|---------------------------------|--------------------------------|
| 04 Jun        | Surface | 279904                 | 1935                        | 258552                          | 19382                          |
|               | Middle  | 309552                 | 1798                        | 288666                          | 18680                          |
|               | Bottom  | 301956                 | 1743                        | 281470                          | 17736                          |
| 21 Jul        | Surface | 294606                 | 2423                        | 270026                          | 20972                          |
|               | Middle  | 278252                 | 1743                        | 257822                          | 17976                          |
|               | Bottom  | 297738                 | 1728                        | 276542                          | 18878                          |
| 04 Aug        | Surface | 202130                 | 1021                        | 189882                          | 11374                          |
|               | Middle  | 212194                 | 1224                        | 197980                          | 13312                          |
|               | Bottom  | 256416                 | 1094                        | 241440                          | 13992                          |
| 22 Sep        | Surface | 356056                 | 54783                       | 241724                          | 5646                           |
|               | Middle  | 357448                 | 51594                       | 249294                          | 5800                           |
|               | Bottom  | 363996                 | 53832                       | 251542                          | 5588                           |
| 26 Oct        | Surface | 361714                 | 12461                       | 328656                          | 8136                           |
|               | Middle  | 242786                 | 8689                        | 221592                          | 3816                           |
|               | Bottom  | 328198                 | 12286                       | 297226                          | 6400                           |
| 16 Nov        | Surface | 343340                 | 14935                       | 305656                          | 7814                           |
|               | Middle  | 298736                 | 11857                       | 268646                          | 6376                           |
|               | Bottom  | 324856                 | 14010                       | 289974                          | 6862                           |
| 05 Dec        | Surface | 251508                 | 18868                       | 207490                          | 6282                           |
|               | Middle  | 352656                 | 31621                       | 281412                          | 8002                           |
|               | Bottom  | 265134                 | 23089                       | 213334                          | 5622                           |

<sup>1</sup>Number of raw sequencing data which has 100bp.

<sup>2</sup>Number of raw sequencing data which are not assembled.

<sup>3</sup>Number of raw sequencing data which has high quality.

<sup>4</sup>Number of raw sequencing data which has low quality.
